# Supplementary material for: Asymmetric Synthesis of Fully Substituted Cyclopentane-Oxindoles through an Organocatalytic Triple Michael Domino Reaction
Source: PubMed Central journal article supplement — Chemistry. 2014 Dec 2;21(3):1004–8. doi: 10.1002/chem.201406047 (PMC4648040; doi:10.1002/chem.201406047), 2014-12-02
Supplement: chem0021-1004-sd1.pdf [file chem0021-1004-sd1.pdf]

# CHEMISTRY

## A **European** Journal

### Supporting Information

© Copyright Wiley-VCH Verlag GmbH & Co. KGaA, 69451 Weinheim, 2014

#### **Asymmetric Synthesis of Fully Substituted Cyclopentane-Oxindoles through an Organocatalytic Triple Michael Domino Reaction**

Liang-Hua Zou, Arne R. Philipps, Gerhard Raabe, and Dieter Enders\*<sup>[a]</sup>

chem\_201406047\_sm\_miscellaneous\_information.pdf

# CONTENTS

|                                          |    |
|------------------------------------------|----|
| 1. General Information.....              | 2  |
| 2. Materials .....                       | 2  |
| 3. General Procedure.....                | 3  |
| 4. Analytical Data of the Products ..... | 4  |
| 5. References.....                       | 11 |
| 6. NMR Spectra and HPLC Data .....       | 12 |

## 1. General Information

Flash chromatography was carried out with Merck silica gel 60 (230-240 mesh). Analytical TLC was performed with aluminium-backed silica gel sheets 60 F254 (Merck), and the products were visualized by UV detection. Optical rotation values were measured on a Perkin-Elmer 241 polarimeter. Microanalyses were performed with a Vario EL element analyser. High resolution mass spectra (HRMS) were acquired on a ThermoFisher Scientific LTQ-Orbitrap XL. IR spectra ( $\text{cm}^{-1}$ ) were taken on a PerkinElmer Spectrum 100 FT-IR Spectrometer.  $^1\text{H}$  NMR and  $^{13}\text{C}$  NMR spectra were recorded at ambient temperature on Inova 400 or Agilent VNMRS 600 spectrometers. Chemical shifts ( $\delta$ ) are given in ppm relative to solvent residual peak ( $\text{CDCl}_3$ ,  $\delta = 7.26$  ppm) as external standard. Analytical HPLC was performed on a Hewlett-Packard 1100 Series instrument using chiral stationary phases [Daicel IC, Daicel AD, Daicel IA, Merck (s,s)-Whelk 01]. Abbreviations are as follows: s (singlet), d (doublet), t (triplet), q (quartet), m (multiplet), bs (broad singlet).

## 2. Materials

*N*-Boc-oxindoles **1a-f** were synthesized according to the known procedures.<sup>[1]</sup> Nitrodiene **2** was prepared according to the literature.<sup>[2]</sup> Chloroform (analytical grade) was bought from Fisher. Other solvents were dried and distilled prior to use. All other chemicals were used as purchased from commercial suppliers without further purification.

The racemic samples of **4a**, **4b**, **4d**, **4e**, **4f**, **4g**, **4h**, **4i** and **4j** were prepared using pyrrolidine as catalyst. The racemic samples of **4c**, **4k**, **4l**, **4m**, were prepared using a mixture of (R+S)-catalyst A. The racemic sample of **6** was prepared according to the literature.<sup>[3]</sup>

Procedure for the synthesis of compound **6**: To a 25 mL round bottom flask, equipped with a stirring bar, was added compound **4a** (112 mg, 0.17 mmol), trifluoroacetic acid (0.8 ml) and DCM (8 mL). After stirring for 15 h, a saturated aqueous NaHCO<sub>3</sub> solution (20 mL) solution was added. The mixture was extracted with DCM (3 x 50 mL) and washed with brine. The combined organic layers were dried over Na<sub>2</sub>SO<sub>4</sub>, filtered and concentrated under reduced pressure. Purification was performed by column chromatography on silica gel (pentane/ethyl acetate = 3:1 as eluent) to provide the desired product **6** as a colorless solid in 94% yield and with 95% ee (89 mg, 0.16 mmol).

### 3. General Procedure

General procedure for the organocatalytic domino reaction (described for **4a** as a typical example):

a) Method A: A 10 mL glass vial equipped with a magnetic stirring bar was charged with **1a** (154.6 mg, 0.5 mmol), **2** (86 mg, 0.5 mmol), **3a** (66 mg, 0.5 mmol) and catalyst **A** (81.5 mg, 0.25 mmol). After adding CHCl<sub>3</sub> (4 mL), the reaction tube was purged using an argon flow for 1 min, then covered with a teflon-coated screw cap. The reaction mixture was stirred at room temperature for 22 h. After addition of Wittig reagent **5** (250 mg, 0.75 mmol) and purging using an argon flow for 1 min, the mixture was stirred for another 5 h. The resulting solution was then directly applied to flash chromatography (at first pentane/ethyl acetate = 10:1, then pentane/ethyl acetate = 5:1 as eluent) to get the desired product **4a** as a yellow solid (180 mg, 54% yield, 15:1 dr, 98% ee).

b) Method B: A 10 mL glass vial equipped with a magnetic stirring bar was charged with **1a** (51.5 mg, 0.17 mmol), **2** (28.7 mg, 0.17 mmol), **3a** (22 mg, 0.17 mmol) and catalyst **A** (81.5 mg, 0.25 mmol) (starting materials **1a**, **2** and **3a** were divided into three portions). The reaction tube was purged using an argon flow for 1 min, then covered with a teflon-coated screw cap after adding CHCl<sub>3</sub> (4 mL). After stirring at room temperature for 3 h, the second portion of **1a** (51.5 mg, 0.17 mmol), **2** (28.7 mg, 0.17 mmol) and **3a** (22 mg, 0.17 mmol) was added in the reaction tube. After purging using an argon flow for 1 min, the mixture was stirred for another 3 h. After that, the third portion of **1a** (51.5 mg, 0.17 mmol), **2** (28.7 mg, 0.17 mmol) and **3a** (22 mg, 0.17 mmol) was added into the reaction mixture, which was stirred for another 16 h after purging using an argon flow for 1 min. Then the first portion of Wittig reagent **5** (83.5 mg, 0.25 mmol) was added into the reaction tube. The mixture was stirred for 3 h after purging using an argon flow for 1 min. After that, the second portion of Wittig reagent **5** (83.5 mg, 0.25 mmol) was added into the reaction mixture. The mixture was stirred for another 3 h after purging using an argon flow for 1 min. The resulting solution was then directly applied to flash chromatography (at first pentane/ethyl acetate = 10:1, then pentane/ethyl acetate = 5:1 as eluent) to get product **4a** as a yellow solid (209 mg, 63% yield, 15:1 dr, 99% ee).

For both cases, the major diastereoisomer could be isolated as a colorless solid by using a preparative TLC plate (hexane/isopropanol = 15:1 as eluent).

#### 4. Analytical data of the products

(*S*)-*tert*-Butyl-3-{(1*S*, 2*S*, 3*S*, 4*S*, 5*R*)-2-(2-ethoxy-2-oxoethyl)-3-[(*E*)-3-methoxy-3-oxoprop-1-en-1-yl]-5-nitro-4-phenylcyclopentyl}-2-oxo-3-phenylindoline-1-carboxylate (**4a**)

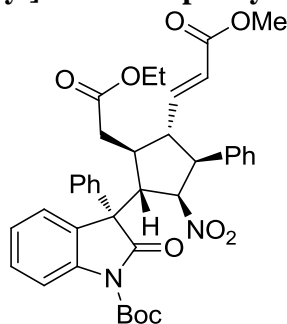

The compound was prepared according to the general procedure (method B). The product was obtained as a colorless solid, yield 63%, m.p. 74-76 °C. The ee (99%) was measured by HPLC using a chiral stationary phase [Daicel IC, n-heptane:EtOH = 97:3, 0.7 mL/min,  $t_R$  = 20.66 min (major), 15.39 min (minor)].  $[\alpha]_D^{22} = -77.9$  ( $c = 0.66$ ,  $\text{CHCl}_3$ ).

$^1\text{H NMR}$  (600 MHz,  $\text{CDCl}_3$ ):  $\delta = 8.04$  (d,  $J = 8.2$  Hz, 1H), 7.52-7.50 (m, 1H), 7.38-7.36 (m, 4H), 7.33-7.28 (m, 3H), 7.24-7.20 (m, 3H), 7.00 (d,  $J = 6.7$  Hz, 2H), 6.30 (dd,  $J = 15.5$  Hz, 9.5 Hz, 1H), 5.75 (d,  $J = 15.6$  Hz, 1H), 4.86 (d,  $J = 6.4$  Hz, 1H), 4.05-4.01 (m, 3H), 3.58 (s, 3H), 3.47-3.41 (m, 1H), 3.30-3.26 (m, 1H), 2.52 (d,  $J = 14.0$  Hz, 1H), 2.32-2.27 (m, 2H), 1.61 (s, 9H), 1.22 (t,  $J = 7.1$  Hz, 3H);  $^{13}\text{C NMR}$  (150 MHz,  $\text{CDCl}_3$ ):  $\delta = 174.9$ , 171.0, 165.9, 148.6, 146.5, 140.6, 136.6, 133.2, 130.0, 129.2, 128.8, 128.6, 128.3, 127.7, 127.5, 124.9, 124.6, 124.1, 116.0, 94.8, 85.0, 60.6, 58.3, 55.0, 54.8, 51.4, 50.4, 42.1, 37.6, 29.7, 28.0, 14.0. IR: 2970, 1736, 1553, 1457, 1365, 1218, 1150, 987, 905, 845, 736. HRMS (ESI): calcd for  $\text{C}_{38}\text{H}_{40}\text{N}_2\text{O}_9\text{Na}$ : 691.2632; found: 691.2631. Anal. Calcd for  $\text{C}_{38}\text{H}_{40}\text{N}_2\text{O}_9$ : C, 68.25; H, 6.03; N, 4.19; Found: C, 67.95; H, 6.04; N, 4.16.

**(S)-tert-Butyl-3-((1S, 2S, 3S, 4S, 5R)-2-(2-ethoxy-2-oxoethyl)-3-[(E)-3-methoxy-3-oxoprop-1-en-1-yl]-5-nitro-4-phenylcyclopentyl)-5-methyl-2-oxo-3-phenylindoline-1-carboxylate (4b)**

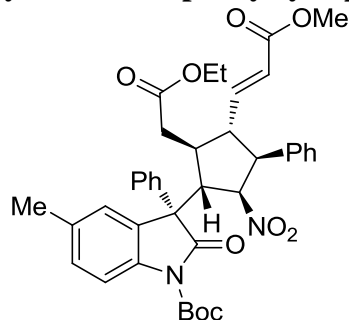

The compound was prepared according to the general procedure (method B). The product was obtained as a colorless solid, yield 63%, m.p. 80-82 °C. The ee (98%) was measured by HPLC using a chiral stationary phase [Daicel AD, n-heptane:isopropanol = 97:3, 0.3 mL/min,  $t_R$  = 45.76 min (major), 59.97 min (minor)].  $[\alpha]_D^{22} = -77.5$  ( $c = 1.06$ ,  $\text{CHCl}_3$ ).

$^1\text{H}$  NMR (600 MHz,  $\text{CDCl}_3$ ):  $\delta = 7.91$  (d,  $J = 8.4$  Hz, 1H), 7.36 (d,  $J = 7.6$  Hz, 2H), 7.33-7.28 (m, 4H), 7.24-7.20 (m, 3H), 7.18 (s, 1H), 6.97 (d,  $J = 6.8$  Hz, 2H), 6.29 (dd,  $J = 15.5$  Hz, 9.6 Hz, 1H), 5.75 (d,  $J = 15.6$  Hz, 1H), 4.87 (d,  $J = 6.5$  Hz, 1H), 4.04-4.00 (m, 3H), 3.58 (s, 3H), 3.46-3.40 (m, 1H), 3.25-3.22 (m, 1H), 2.54 (d,  $J = 15.5$  Hz, 1H), 2.49 (s, 3H), 2.33 (br, 1H), 2.24 (br, 1H), 1.60 (s, 9H), 1.21 (t,  $J = 7.2$  Hz, 3H);  $^{13}\text{C}$  NMR (150 MHz,  $\text{CDCl}_3$ ):  $\delta = 175.0$ , 171.0, 166.0, 148.7, 146.6, 138.3, 136.8, 134.6, 133.2, 130.5, 129.2, 128.8, 128.5, 128.3, 127.7, 127.6, 125.2, 124.1, 115.7, 94.8, 84.8, 60.6, 58.4, 55.1, 54.6, 51.4, 50.4, 42.0, 37.7, 29.7, 28.0, 21.5, 14.0. IR: 2939, 1731, 1550, 1470, 1344, 1245, 1155, 1030, 845, 747. HRMS (ESI) calcd for  $\text{C}_{39}\text{H}_{42}\text{N}_2\text{O}_9\text{Na}$ : 705.2788; found: 705.2765.

**(S)-tert-Butyl-3-((1S, 2S, 3S, 4S, 5R)-2-(2-ethoxy-2-oxoethyl)-3-[(E)-3-methoxy-3-oxoprop-1-en-1-yl]-5-nitro-4-phenylcyclopentyl)-5-methoxy-2-oxo-3-phenylindoline-1-carboxylate (4c)**

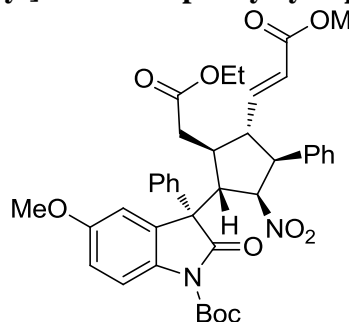

The compound was prepared according to the general procedure (method B). The product was obtained as a colorless solid, yield 72%, m.p. 83-85 °C. The ee (97%) was measured by HPLC using a chiral stationary phase [Daicel IA, n-heptane:isopropanol = 95:5, 0.7 mL/min,  $t_R$  = 24.37 min (major), 38.75 min (minor)].  $[\alpha]_D^{22} = -58.7$  ( $c = 2.07$ ,  $\text{CHCl}_3$ ).

$^1\text{H}$  NMR (600 MHz,  $\text{CDCl}_3$ ):  $\delta = 7.97$  (d,  $J = 9.0$  Hz, 1H), 7.36 (d,  $J = 7.4$  Hz, 2H), 7.32-7.28 (m, 3H), 7.24-7.20 (m, 3H), 7.03-7.00 (m, 3H), 6.91 (d,  $J = 2.6$  Hz, 1H), 6.32 (dd,  $J = 15.5$  Hz, 9.5 Hz, 1H), 5.77 (d,  $J = 15.6$  Hz, 1H), 4.86 (d,  $J = 6.3$  Hz, 1H), 4.05-4.00 (m, 3H), 3.90 (s, 3H), 3.58 (s, 3H), 3.47-3.41 (m, 1H), 3.32-3.28 (m, 1H), 2.54 (d,  $J = 15.7$  Hz, 1H), 2.34 (br, 1H), 2.25 (br, 1H), 1.60 (s, 9H), 1.21 (t,  $J = 7.1$  Hz, 3H);  $^{13}\text{C}$  NMR (150 MHz,  $\text{CDCl}_3$ ):  $\delta = 174.9$ , 171.0, 166.0, 157.1, 148.7, 146.6, 136.7, 133.9, 133.2, 129.2, 128.8, 128.6, 128.3, 127.7, 127.5, 124.2, 116.8, 113.9, 111.6, 94.8, 84.8, 60.6, 58.6,

55.8, 55.0, 54.7, 51.5, 50.5, 42.0, 37.7, 29.7, 28.0, 14.0. IR: 2940, 1732, 1554, 1479, 1360, 1237, 1155, 1031, 839, 702. HRMS (ESI) calcd for C<sub>39</sub>H<sub>42</sub>N<sub>2</sub>O<sub>10</sub>Na: 721.2737; found: 721.2703.

**(S)-tert-Butyl-3-((1S, 2S, 3S, 4S, 5R)-2-(2-ethoxy-2-oxoethyl)-3-[(E)-3-methoxy-3-oxoprop-1-en-1-yl]-5-nitro-4-phenylcyclopentyl)-2-oxo-3-biphenylindoline-1-carboxylate (4d)**

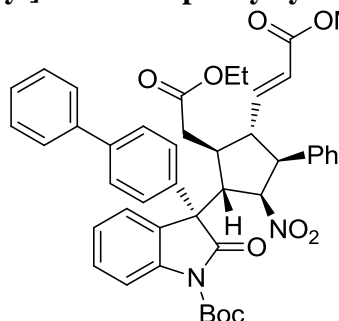

The compound was prepared according to the general procedure (method A). The product was obtained as a colorless solid, yield 57%, m.p. 90-92 °C. The ee (99%) was measured by HPLC using a chiral stationary phase [Merck (s,s)-Whelk 01, n-heptane:EtOH = 7:3, 0.7 mL/min, t<sub>R</sub> = 14.13 min (major), 18.75 min (minor)]. [α]<sub>D</sub><sup>22</sup> = -70.8 (c = 1.12, CHCl<sub>3</sub>).

<sup>1</sup>H NMR (600 MHz, CDCl<sub>3</sub>): δ = 8.07 (d, J = 8.2 Hz, 1H), 7.54-7.50 (m, 5H), 7.42-7.39 (m, 6H), 7.32 (m, J = 7.3 Hz, 1H), 7.25-7.21 (m, 3H), 7.01 (d, J = 6.8 Hz, 2H), 6.32-6.28 (m, 1H), 5.76 (d, J = 15.6 Hz, 1H), 4.93 (d, J = 6.0 Hz, 1H), 4.08 (dd, J = 8.4 Hz, 2.5 Hz, 1H), 4.05-4.01 (m, 2H), 3.58 (s, 3H), 3.48-3.43 (m, 1H), 3.31-3.28 (m, 1H), 2.58 (d, J = 14.5 Hz, 1H), 2.38-2.34 (m, 1H), 2.27 (bs, 1H), 1.62 (s, 9H), 1.22 (t, J = 7.1 Hz, 3H); <sup>13</sup>C NMR (150 MHz, CDCl<sub>3</sub>): δ = 174.9, 171.0, 165.9, 148.6, 146.5, 141.5, 140.7, 139.9, 135.6, 133.2, 130.1, 128.8 (2C), 128.3, 128.0, 127.8, 127.7, 127.6, 127.4, 125.0, 124.6, 124.1, 116.0, 94.9, 85.0, 60.6, 58.2, 55.0, 54.7, 51.5, 50.4, 42.1, 37.8, 29.7, 28.0, 14.0. IR: 2933, 1730, 1553, 1464, 1347, 1233, 1152, 1028, 841, 749, 699. HRMS (ESI) calcd for C<sub>44</sub>H<sub>44</sub>N<sub>2</sub>O<sub>9</sub>Na: 767.2945; found: 767.2895.

**(R)-tert-Butyl-3-benzyl-3-((1S, 2S, 3S, 4S, 5R)-2-(2-ethoxy-2-oxoethyl)-3-[(E)-3-methoxy-3-oxoprop-1-en-1-yl]-5-nitro-4-phenylcyclopentyl)-2-oxoindoline-1-carboxylate (4e)**

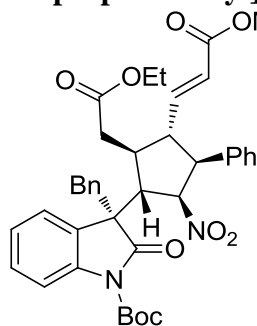

The compound was prepared according to the general procedure (method B). The product was obtained as a colorless solid, yield 30%, m.p. 65-67 °C. The ee (99%) was measured by HPLC using a chiral stationary phase [Daicel IA, n-heptane:EtOH = 7:3, 0.7 mL/min, t<sub>R</sub> = 12.29 min (major), 9.34 min (minor)]. [α]<sub>D</sub><sup>22</sup> = -17.6 (c = 0.46, CHCl<sub>3</sub>).

<sup>1</sup>H NMR (600 MHz, CDCl<sub>3</sub>): δ = 7.48 (d, J = 8.1 Hz, 1H), 7.27 (d, J = 8.1 Hz, 2H), 7.24-7.21 (m, 2H), 7.17 (t, J = 7.2 Hz, 1H), 7.03-6.97 (m, 5H), 6.73 (q, J = 7.8 Hz, 3H), 5.64 (d, J = 15.8 Hz, 1H), 4.43 (t, J = 7.9 Hz, 1H), 4.20-4.08 (m, 2H), 3.64-3.58 (m, 5H), 3.45 (d, J = 12.8 Hz, 2H), 3.39 (dd, J = 7.1 Hz, 3.0

Hz, 1H), 3.35-3.30 (m, 1H), 3.02 (d,  $J = 12.8$  Hz, 1H), 2.77-2.74 (m, 1H), 2.63-2.60 (m, 1H), 1.55 (s, 9H), 1.28 (t,  $J = 7.2$  Hz, 3H);  $^{13}\text{C}$  NMR (150 MHz,  $\text{CDCl}_3$ ):  $\delta = 176.4, 171.7, 165.9, 148.0, 143.8, 139.8, 136.0, 133.9, 129.7, 129.4, 129.2, 128.3, 127.7, 127.0, 126.9, 124.7, 124.6, 123.3, 115.2, 96.0, 84.5, 61.0, 56.6, 55.5, 54.4, 51.5, 48.1, 42.9, 39.7, 37.7, 29.7, 28.0, 14.1$ . IR: 2931, 1674, 1450, 1291, 1221, 1145, 974, 851, 753, 693. HRMS (ESI) calcd for  $\text{C}_{39}\text{H}_{42}\text{N}_2\text{O}_9\text{Na}$ : 705.2788; found: 705.2754.

**(R)-tert-Butyl-3-[(1S, 2S, 3S, 4S, 5R)-2-(2-ethoxy-2-oxoethyl)-3-[(E)-3-methoxy-3-oxoprop-1-en-1-yl]-5-nitro-4-phenylcyclopentyl]-3-methyl-2-oxoindoline-1-carboxylate (4f)**

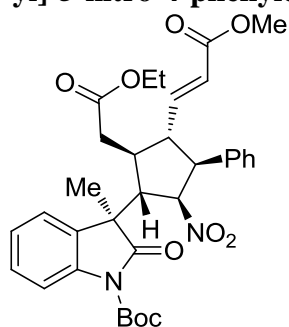

The compound was prepared according to the general procedure (method A). The product was obtained as a colorless solid, yield 44%, m.p. 57-59 °C. The ee (91%) was measured by HPLC using a chiral stationary phase [Daicel IA, n-heptane:isopropanol = 95:5, 0.7 mL/min,  $t_{\text{R}} = 22.17$  min (major), 27.99 min (minor)].  $[\alpha]_{\text{D}}^{22} = -5.8$  ( $c = 0.87$ ,  $\text{CHCl}_3$ ).

$^1\text{H}$  NMR (600 MHz,  $\text{CDCl}_3$ ):  $\delta = 7.83$  (d,  $J = 8.2$  Hz, 1H), 7.35-7.33 (m, 1H), 7.27-7.23 (m, 3H), 7.17-7.16 (m, 2H), 7.00 (d,  $J = 6.8$  Hz, 2H), 6.67 (dd,  $J = 15.8$  Hz, 7.2 Hz, 1H), 5.57 (d,  $J = 15.6$  Hz, 1H), 4.43-4.40 (m, 1H), 4.17-4.10 (m, 2H), 3.60 (s, 3H), 3.58-3.55 (m, 1H), 3.17-3.14 (m, 3H), 2.67 (dd,  $J = 15.3$  Hz, 6.6 Hz, 1H), 2.53 (dd,  $J = 15.4$  Hz, 6.9 Hz, 1H), 1.67 (s, 9H), 1.51 (s, 3H), 1.27 (t,  $J = 7.2$  Hz, 3H);  $^{13}\text{C}$  NMR (150 MHz,  $\text{CDCl}_3$ ):  $\delta = 177.4, 171.6, 165.8, 148.7, 143.7, 139.0, 136.1, 129.7, 129.3, 129.2, 128.3, 126.9, 125.1, 124.5, 122.8, 115.4, 95.5, 85.0, 60.9, 56.3, 54.3, 51.5, 49.7, 48.1, 39.5, 37.5, 30.9, 28.1, 22.5, 14.1$ . IR: 2976, 1729, 1553, 1478, 1240, 1153, 1031, 838, 748. HRMS (ESI) calcd for  $\text{C}_{33}\text{H}_{38}\text{N}_2\text{O}_9\text{Na}$ : 629.2475; found: 629.2448.

**(S)-tert-Butyl-3-[(1S, 2S, 3S, 4S, 5R)-2-(2-ethoxy-2-oxoethyl)-3-[(E)-3-methoxy-3-oxoprop-1-en-1-yl]-4-(4-methoxyphenyl)-5-nitrocyclopentyl]-2-oxo-3-phenylindoline-1-carboxylate (4g)**

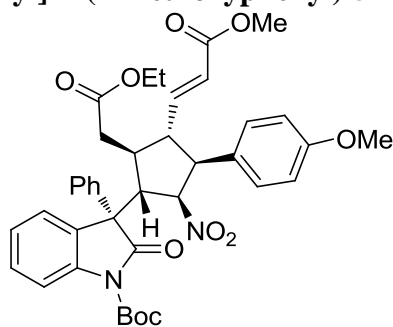

The compound was prepared according to the general procedure (method B). The product was obtained as a colorless solid, yield 61%, m.p. 90-92 °C. The ee (99%) was measured by HPLC using a chiral stationary phase [Daicel IC, n-heptane:isopropanol = 7:3, 0.5 mL/min,  $t_{\text{R}} = 12.51$  min (major), 9.36 min (minor)].  $[\alpha]_{\text{D}}^{22} = -66.9$  ( $c = 0.48$ ,  $\text{CHCl}_3$ ).

$^1\text{H}$  NMR (600 MHz,  $\text{CDCl}_3$ ):  $\delta$  = 8.03 (d,  $J$  = 8.2 Hz, 1H), 7.50 (p,  $J$  = 4.6 Hz, 1H), 7.37-7.35 (m, 4H), 7.32-7.28 (m, 3H), 6.91 (d,  $J$  = 8.7 Hz, 2H), 6.74 (d,  $J$  = 8.8 Hz, 2H), 6.30-6.26 (m, 1H), 5.73 (d,  $J$  = 15.6 Hz, 2H), 4.82 (d,  $J$  = 6.4 Hz, 1H), 4.04-4.00 (m, 3H), 3.72 (s, 3H), 3.58 (s, 3H), 3.40-3.34 (m, 1H), 3.24-3.21 (m, 1H), 2.51 (d,  $J$  = 14.6 Hz, 1H), 2.30-2.24 (br, 1H), 1.61 (s, 9H), 1.21 (t,  $J$  = 7.2 Hz, 3H);  $^{13}\text{C}$  NMR (150 MHz,  $\text{CDCl}_3$ ):  $\delta$  = 175.0, 171.0, 165.9, 159.4, 148.6, 146.7, 140.5, 136.7, 130.0, 129.2, 128.8, 128.6, 127.5, 125.1, 125.0, 124.5, 124.0, 116.0, 114.2, 94.8, 85.0, 60.6, 58.3, 55.1, 54.8, 54.4, 51.4, 50.7, 42.0, 37.7, 29.7, 28.0, 14.0. IR: 2927, 1728, 1553, 1462, 1248, 1154, 1031, 843, 752. HRMS (ESI) calcd for  $\text{C}_{39}\text{H}_{42}\text{N}_2\text{O}_{10}\text{Na}$ : 721.2737; found: 721.2678.

**(S)-tert-Butyl-3-((1S, 2S, 3S, 4S, 5R)-4-(4-chlorophenyl)-2-(2-ethoxy-2-oxoethyl)-3-[(E)-3-methoxy-3-oxoprop-1-en-1-yl]-5-nitrocyclopentyl)-2-oxo-3-phenylindoline-1-carboxylate (4h)**

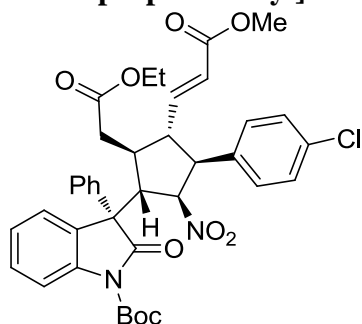

The compound was prepared according to the general procedure (method B). The product was obtained as a colorless solid, yield 65%, m.p. 89-91 °C. The ee (99%) was measured by HPLC using a chiral stationary phase [Daicel IC, n-heptane:EtOH = 97:3, 0.7 mL/min,  $t_{\text{R}}$  = 17.41 min (major), 15.52 min (minor)].  $[\alpha]_{\text{D}}^{22}$  = -62.3 ( $c$  = 1.43,  $\text{CHCl}_3$ ).

$^1\text{H}$  NMR (600 MHz,  $\text{CDCl}_3$ ):  $\delta$  = 8.02 (d,  $J$  = 8.2 Hz, 1H), 7.52-7.49 (m, 1H), 7.38-7.36 (m, 4H), 7.33-7.29 (m, 3H), 7.20 (d,  $J$  = 8.5 Hz, 2H), 6.93 (d,  $J$  = 8.5 Hz, 2H), 6.31-6.27 (m, 1H), 5.74 (d,  $J$  = 15.6 Hz, 1H), 4.82 (d,  $J$  = 6.3 Hz, 1H), 4.05-4.01 (m, 3H), 3.59 (s, 3H), 3.42-3.36 (m, 1H), 3.26-3.23 (m, 1H), 2.47 (d,  $J$  = 14.1 Hz, 1H), 2.26 (bs, 2H), 1.61 (s, 9H), 1.22 (t,  $J$  = 7.1 Hz, 3H);  $^{13}\text{C}$  NMR (150 MHz,  $\text{CDCl}_3$ ):  $\delta$  = 174.9, 170.9, 165.8, 148.6, 146.1, 140.5, 136.4, 134.3, 131.8, 130.0, 129.2, 129.1, 129.0, 128.7, 127.5, 125.0, 124.4, 124.3, 116.0, 94.6, 85.1, 60.6, 58.2, 54.7, 54.2, 51.5, 50.5, 42.0, 37.4, 29.7, 28.0, 14.0. IR: 2941, 1729, 1554, 1467, 1346, 1285, 1247, 1150, 1094, 1019, 845, 757, 724. HRMS (ESI) calcd for  $\text{C}_{38}\text{H}_{39}\text{ClN}_2\text{O}_9\text{Na}$ : 725.2242; found: 725.2222.

**(S)-tert-Butyl-3-((1S, 2S, 3S, 4S, 5R)-2-(2-ethoxy-2-oxoethyl)-3-[(E)-3-methoxy-3-oxoprop-1-en-1-yl]-5-nitro-4-(4-nitrophenyl)cyclopentyl)-2-oxo-3-phenylindoline-1-carboxylate (4i)**

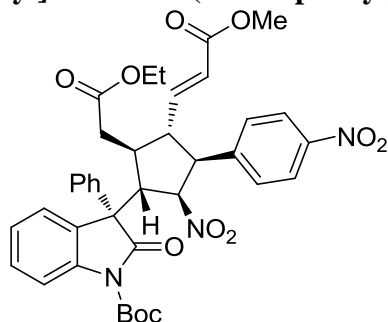

The compound was prepared according to the general procedure (method A). The product was obtained as a yellow solid, yield 61%, m.p. 93-95 °C. The ee (99%) was measured by HPLC using a chiral



stationary phase [Daicel IA, n-heptane:EtOH = 7:3, 0.7 mL/min,  $t_R$  = 9.45 min (major), 15.28 min (minor)].  $[\alpha]_D^{22} = -53.0$  ( $c = 0.74$ ,  $\text{CHCl}_3$ ).

$^1\text{H}$  NMR (600 MHz,  $\text{CDCl}_3$ ):  $\delta = 8.09$  (d,  $J = 8.7$  Hz, 2H), 8.01 (d,  $J = 8.7$  Hz, 1H), 7.52-7.49 (m, 1H), 7.40-7.36 (m, 4H), 7.34-7.30 (m, 3H), 7.19 (d,  $J = 8.7$  Hz, 2H), 6.34-6.30 (m, 1H), 5.78 (d,  $J = 15.6$  Hz, 1H), 4.84 (d,  $J = 5.7$  Hz, 1H), 4.09-4.03 (m, 3H), 3.59 (s, 3H), 3.51-3.45 (m, 1H), 3.41-3.38 (m, 1H), 2.43 (d,  $J = 14.8$  Hz, 2H), 2.20 (bs, 1H), 1.62 (s, 9H), 1.23 (t,  $J = 7.1$  Hz, 3H);  $^{13}\text{C}$  NMR (150 MHz,  $\text{CDCl}_3$ ):  $\delta = 175.0$ , 170.8, 165.7, 148.5, 147.8, 145.5, 140.7, 140.3, 136.2, 130.1, 129.3, 128.9, 128.8, 127.4, 125.0, 124.7, 124.3, 123.9, 116.1, 94.4, 85.2, 60.7, 58.1, 54.5, 54.1, 51.6, 50.3, 42.1, 37.0, 29.7, 28.0, 14.0. IR: 2940, 2322, 2077, 1729, 1535, 1464, 1345, 1243, 1152, 1027, 854, 748. HRMS (ESI) calcd for  $\text{C}_{38}\text{H}_{39}\text{N}_3\text{O}_{11}\text{Na}$ : 736.2482; found: 736.2452.

**(S)-tert-Butyl-3-[(1S, 2S, 3S, 4S, 5R)-2-(2-ethoxy-2-oxoethyl)-3-[(E)-3-methoxy-3-oxoprop-1-en-1-yl]-5-nitro-4-(2-nitrophenyl)cyclopentyl]-2-oxo-3-phenylindoline-1-carboxylate (4j)**

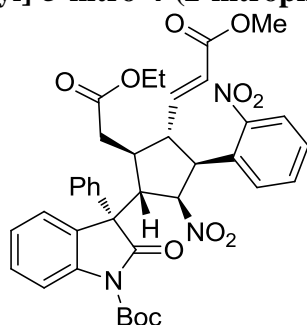

The compound was prepared according to the general procedure (method B). The product was obtained as a yellow solid, yield 61%, m.p. 89-91 °C. The ee (97%) was measured by HPLC using a chiral stationary phase [Daicel IA, n-heptane:EtOH = 9:1, 1.0 mL/min,  $t_R$  = 10.51 min (major), 9.34 min (minor)].  $[\alpha]_D^{22} = -207.3$  ( $c = 1.25$ ,  $\text{CHCl}_3$ ).

$^1\text{H}$  NMR (600 MHz,  $\text{CDCl}_3$ ):  $\delta = 8.02$  (d,  $J = 8.2$  Hz, 1H), 7.96 (d,  $J = 8.2$  Hz, 1H), 7.64 (d,  $J = 7.4$  Hz, 1H), 7.53-7.48 (m, 2H), 7.43-7.38 (m, 4H), 7.32-7.27 (m, 3H), 7.14 (d,  $J = 7.6$  Hz, 1H), 6.27-6.23 (m, 1H), 5.78 (d,  $J = 15.6$  Hz, 1H), 5.31 (br, 1H), 4.18 (dd,  $J = 8.7$  Hz, 2.4 Hz, 1H), 4.08-3.99 (m, 2H), 3.86 (dd,  $J = 12.5$  Hz, 7.9 Hz, 1H), 3.58 (s, 3H), 3.55-3.50 (m, 1H), 2.54 (d,  $J = 12.5$  Hz, 1H), 2.34-2.22 (m, 2H), 1.62 (s, 9H), 1.22 (t,  $J = 7.1$  Hz, 3H);  $^{13}\text{C}$  NMR (150 MHz,  $\text{CDCl}_3$ ):  $\delta = 175.1$ , 170.8, 165.6, 149.5, 148.6, 145.4, 140.3, 136.7, 133.9, 129.9, 129.3, 129.2, 128.8, 128.6, 127.5, 125.6, 125.3, 124.9 (2C), 115.8, 93.4, 84.9, 60.7, 58.0, 54.8, 51.6, 50.4, 49.8, 41.7, 36.9, 29.6, 28.0, 14.0. IR: 2980, 1730, 1535, 1464, 1344, 1285, 1152, 1025, 848, 732. HRMS (ESI) calcd for  $\text{C}_{38}\text{H}_{39}\text{N}_3\text{O}_{11}\text{Na}$ : 736.2482; found: 736.2487.

**(S)-tert-Butyl-3-[(1S, 2S, 3S, 4S, 5R)-2-(2-ethoxy-2-oxoethyl)-4-(furan-2-yl)-3-[(E)-3-methoxy-3-oxoprop-1-en-1-yl]-5-nitrocyclopentyl]-2-oxo-3-phenylindoline-1-carboxylate (4k)**

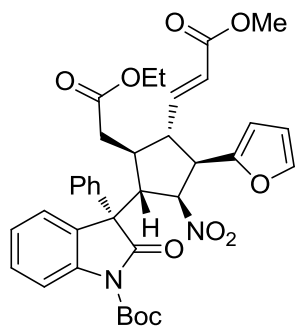

The compound was prepared according to the general procedure (method B). The product was obtained as a pink solid, yield 47%, m.p. 75-77 °C. The ee (99%) was measured by HPLC using a chiral stationary phase [Daicel IC, n-heptane:isopropanol = 9:1, 0.7 mL/min,  $t_R$  = 15.62 min (major), 11.26 min (minor)].  $[\alpha]_D^{22} = -70.5$  (c = 0.29, CHCl<sub>3</sub>).

<sup>1</sup>H NMR (600 MHz, CDCl<sub>3</sub>):  $\delta$  = 8.02 (d,  $J$  = 8.2 Hz, 1H), 7.51-7.48 (m, 1H), 7.37-7.35 (m, 4H), 7.32-7.30 (m, 3H), 7.24 (d,  $J$  = 1.6 Hz, 1H), 6.34-6.30 (m, 1H), 6.21-6.20 (m, 1H), 6.01 (d,  $J$  = 3.2 Hz, 1H), 5.75 (d,  $J$  = 15.6 Hz, 1H), 4.91 (d,  $J$  = 6.7 Hz, 1H), 4.03-4.00 (m, 3H), 3.62 (s, 3H), 3.41-3.37 (m, 1H), 3.28-3.23 (m, 1H), 2.47 (br, 1H), 2.26 (br, 2H), 1.61 (s, 9H), 1.20 (t,  $J$  = 7.2 Hz, 3H); <sup>13</sup>C NMR (150 MHz, CDCl<sub>3</sub>):  $\delta$  = 174.9, 170.9, 165.9, 148.6, 147.9, 146.1, 142.7, 136.5, 130.0, 129.2, 128.6, 127.5, 125.0, 124.5, 124.2, 116.0, 110.5, 108.4, 92.6, 85.0, 60.6, 58.2, 54.9, 51.5, 50.8, 48.9, 41.9, 37.7, 29.7, 28.1, 28.0, 14.0. IR: 2926, 1730, 1555, 1464, 1247, 1151, 1019, 843, 740. HRMS (ESI) calcd for C<sub>36</sub>H<sub>38</sub>N<sub>2</sub>O<sub>10</sub>Na: 681.2424; found: 681.2385.

**(*R*)-tert-Butyl-3-benzyl-3-[(1*S*, 2*S*, 3*S*, 4*S*, 5*R*)-2-(2-ethoxy-2-oxoethyl)-3-[(*E*)-3-methoxy-3-oxoprop-1-en-1-yl]-4-(4-methoxyphenyl)-5-nitrocyclopentyl]-2-oxoindoline-1-carboxylate (4l)**

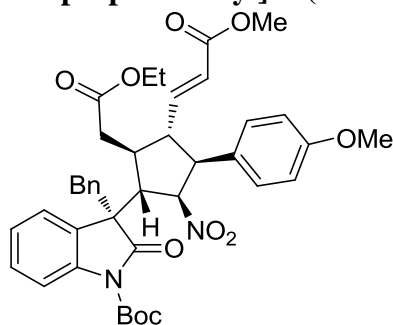

The compound was prepared according to the general procedure (method B). The product was obtained as a colorless solid, yield 47%, m.p. 71-73 °C. The ee (99%) was measured by HPLC using a chiral stationary phase [Daicel IA, n-heptane:isopropanol = 9:1, 1.0 mL/min,  $t_R$  = 28.10 min (major), 10.69 min (minor)].  $[\alpha]_D^{22} = -29.2$  (c = 0.42, CHCl<sub>3</sub>).

<sup>1</sup>H NMR (600 MHz, CDCl<sub>3</sub>): δ = 7.47 (d, *J* = 8.1 Hz, 1H), 7.27 (d, *J* = 7.1 Hz, 1H), 7.24-7.21 (m, 1H), 7.17 (t, *J* = 7.5 Hz, 1H), 7.03 (t, *J* = 7.3 Hz, 1H), 6.98 (t, *J* = 7.7 Hz, 2H), 6.93 (d, *J* = 8.7 Hz, 2H), 6.78 (d, *J* = 8.7 Hz, 2H), 6.73 (dd, *J* = 7.7 Hz, 2.4 Hz, 2H), 5.63 (d, *J* = 15.8 Hz, 1H), 4.39 (t, *J* = 8.4 Hz, 1H), 4.18-4.10 (m, 2H), 3.74 (s, 3H), 3.63 (s, 3H), 3.60-3.54 (m, 2H), 3.44 (d, *J* = 12.8 Hz, 2H), 3.37 (dd, *J* = 7.2 Hz, 3.0 Hz, 1H), 3.29-3.24 (m, 1H), 3.01 (d, *J* = 12.8 Hz, 1H), 2.76-2.72 (m, 1H), 2.62-2.58 (m, 1H), 1.55 (s, 9H), 1.27 (t, *J* = 7.2 Hz, 3H); <sup>13</sup>C NMR (150 MHz, CDCl<sub>3</sub>): δ = 176.4, 171.7, 165.9, 159.4, 148.0, 143.9, 139.8, 133.9, 129.7, 129.3, 128.0, 127.9, 127.4, 127.0, 126.9, 124.6, 123.3, 115.2, 114.6, 96.2, 84.5, 60.9, 56.6, 55.4, 55.2, 53.8, 51.5, 48.1, 42.9, 39.6, 37.8, 29.7, 28.0, 14.1. IR: 2976, 1729, 1551, 1463, 1354, 1247, 1153, 1025, 837, 752, 702. HRMS (ESI) calcd for C<sub>40</sub>H<sub>44</sub>N<sub>2</sub>O<sub>10</sub>Na: 735.2894; found: 735.2853.

**(R)-tert-Butyl-3-benzyl-3-[(1S, 2S, 3S, 4S, 5R)-4-(4-dimethylaminophenyl)-2-(2-ethoxy-2-oxoethyl)-3-(*E*)-3-methoxy-3-oxoprop-1-en-1-yl]-5-nitrocyclopentyl]-2-oxolindoline-1-carboxylate (4m)**

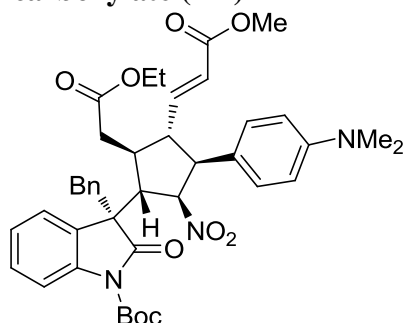

The compound was prepared according to the general procedure (method B). The product was obtained as a yellow solid, yield 63%, m.p. 70-72 °C. The ee (99%) was measured by HPLC using a chiral stationary phase [Daicel IA, n-heptane:isopropanol = 95:5, 0.7 mL/min, *t<sub>R</sub>* = 49.06 min (major), 23.21 min (minor)]. [ $\alpha$ ]<sub>D</sub><sup>22</sup> = -58.9 (*c* = 0.28, CHCl<sub>3</sub>).

<sup>1</sup>H NMR (600 MHz, CDCl<sub>3</sub>): δ = 7.48 (d, *J* = 8.1 Hz, 1H), 7.28 (d, *J* = 7.2 Hz, 1H), 7.22 (td, *J* = 7.7 Hz, 1.2 Hz, 1H), 7.17 (td, *J* = 7.5 Hz, 0.9 Hz, 1H), 7.04-7.01 (m, 1H), 6.99-6.96 (m, 2H), 6.87 (d, *J* = 8.7 Hz, 2H), 6.73-6.71 (m, 2H), 6.59 (d, *J* = 8.0 Hz, 2H), 5.65 (d, *J* = 15.8 Hz, 1H), 4.41 (brs, 1H), 4.18-4.08 (m, 2H), 3.62 (s, 3H), 3.59-3.51 (m, 2H), 3.42 (d, *J* = 12.8 Hz, 1H), 3.35 (dd, *J* = 7.1 Hz, 2.3 Hz, 2H), 3.26-3.21 (m, 1H), 3.01 (d, *J* = 12.9 Hz, 1H), 2.89 (s, 6H), 2.75-2.71 (m, 1H), 2.59 (dd, *J* = 15.4 Hz, 7.2 Hz, 1H), 1.55 (s, 9H), 1.27 (t, *J* = 7.2 Hz, 3H); <sup>13</sup>C NMR (150 MHz, CDCl<sub>3</sub>): δ = 175.1, 170.8, 165.6, 150.2, 149.5, 148.6, 145.4, 140.3, 136.7, 133.9, 129.9, 129.3, 129.2, 128.8, 128.6, 127.5, 125.6, 125.3, 124.9, 115.8, 93.4, 84.9, 60.7, 58.0, 54.8, 51.6, 50.4, 49.8, 41.7, 36.9, 30.9, 29.7, 28.0, 14.0. IR: 2927, 1731, 1550, 1469, 1352, 1246, 1154, 1032, 831, 749. HRMS (ESI) calcd for C<sub>41</sub>H<sub>47</sub>N<sub>3</sub>O<sub>9</sub>Na: 748.3210; found: 748.3173.

**3-[(1S,2S,3S,4R,5S)-2-(2-Ethoxy-2-oxoethyl)-4-nitro-3-[(*S*)-2-oxo-3-phenylindolin-3-yl]-5-phenyleclopentyl]acrylate (6)**

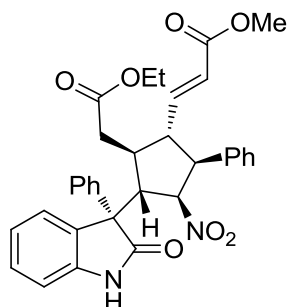

The product was obtained as a colorless solid, yield 94%, m.p. 103-105 °C. The ee (95%) was measured by HPLC using a chiral stationary phase [Daicel IC, n-heptane:EtOH = 9:1, 0.7 mL/min,  $t_R$  = 22.02 min (major), 11.94 min (minor)].  $[\alpha]_D^{22} = -60.3$  (c = 1.29, CHCl<sub>3</sub>).

<sup>1</sup>H NMR (600 MHz, CDCl<sub>3</sub>):  $\delta$  = 8.49 (bs, 1H), 7.46 (d,  $J$  = 7.6 Hz, 2H), 7.40-7.37 (m, 2H), 7.31 (t,  $J$  = 7.1 Hz, 2H), 7.27 (t,  $J$  = 7.2 Hz, 1H), 7.24-7.19 (m, 4H), 7.04-7.01 (m, 3H), 6.40-6.36 (m, 1H), 5.78 (d,  $J$  = 15.6 Hz s, 1H), 4.87 (d,  $J$  = 7.3 Hz, 1H), 4.06-4.02 (m, 3H), 3.58 (s, 3H), 3.53-3.48 (m, 1H), 3.38-3.34 (m, 1H), 2.54 (d,  $J$  = 13.5 Hz, 1H), 2.37-2.32 (m, 2H), 1.23 (t,  $J$  = 7.1 Hz, 3H); <sup>13</sup>C NMR (150 MHz, CDCl<sub>3</sub>):  $\delta$  = 178.0, 171.4, 166.0, 146.9, 141.2, 136.8, 133.3, 129.7, 129.3, 129.1, 128.8, 128.4, 128.3, 127.8, 127.4, 125.2, 124.0, 123.2, 111.1, 94.8, 60.7, 58.2, 54.9, 54.3, 51.5, 50.2, 42.1, 37.6, 29.7, 14.0. IR: 3287, 2935, 1716, 1552, 1469, 1217, 1029, 854, 747, 696. HRMS (ESI) calcd for C<sub>41</sub>H<sub>47</sub>N<sub>3</sub>O<sub>9</sub>Na: 591.2107; found: 591.2064.

## 5. References

- [1] M.-X. Zhao, Z.-W. Zhang, M.-X. Chen, W.-H. Tang, M. Shi, *Eur. J. Org. Chem.* **2001**, 3001-3008.
- [2] S. Belot, A. Quintard, N. Krause, A. Alexakis, *Adv. Synth. Catal.* **2010**, 352, 667-695.
- [3] Q. Zhu, Y. Lu, *Angew. Chem.* **2010**, 122, 7919-7922; *Angew. Chem. Int. Ed.* **2010**, 49, 7753-7756.

## 6. NMR Spectra and HPLC Data

<sup>1</sup>H NMR of **4a**



Sample name: Zou 91-2  
 Data file: C:\SNOOPY\ZOU\ZOU 91-2 IC.D  
 Description: Laufmittel: n-Heptan/EtOH 97:3 Die Probe ist DCM/EtOH/LM gelöst.

Injection date: 2/26/2014 9:25:46 AM  
 Acq. Analysis method: CHIRALPAKIC1-6LNP.M

Column: Chiralpak IC, (150 x 4,6) mm, 5µ, SN: IC00CD-QF015

Pressure at start: 22 bar Start flow: 0.700 ml/min Column oven: 30.01 °C

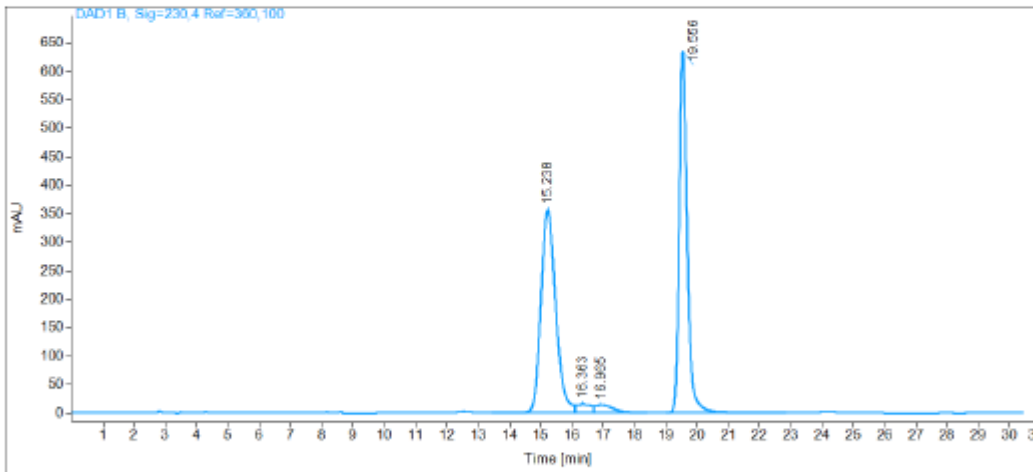

| Name     | Zou 91-2 |        |          |        |             |  |
|----------|----------|--------|----------|--------|-------------|--|
| RT [min] | Type     | Area%  | Area     | Height | Width [min] |  |
| 15.24    | BV       | 48.51  | 11654.49 | 355.90 | 0.50        |  |
| 16.36    | VV       | 2.08   | 499.78   | 14.64  | 0.49        |  |
| 16.97    | VB       | 2.27   | 546.02   | 13.29  | 0.61        |  |
| 19.56    | BB       | 47.14  | 11325.64 | 634.99 | 0.27        |  |
|          | Sum      | 100.00 | 24025.93 |        |             |  |

Chiral HPLC analysis: 4a

**Sample name:** Zou 267 TLC  
**Data file:** C:\SNOOPY\ZOU\267TLC\IC.D  
**Description:** Laufmittel: n-Heptan/EtOH 97:3;  
 Die Probe ist im LM/DCM gelöst.  
**Injection date:** 6/16/2014 3:16:33 PM  
**Acq. Analysis method:** CHIRALPAKIC1-6LNP.M

**Column:** Chiralpak IC, (150 x 4,6) mm, 5 $\mu$ , SN: IC00CD-QF015

**Pressure at start:** 23 bar      **Start flow:** 0.700 ml/min      **Column oven:** 30 °C

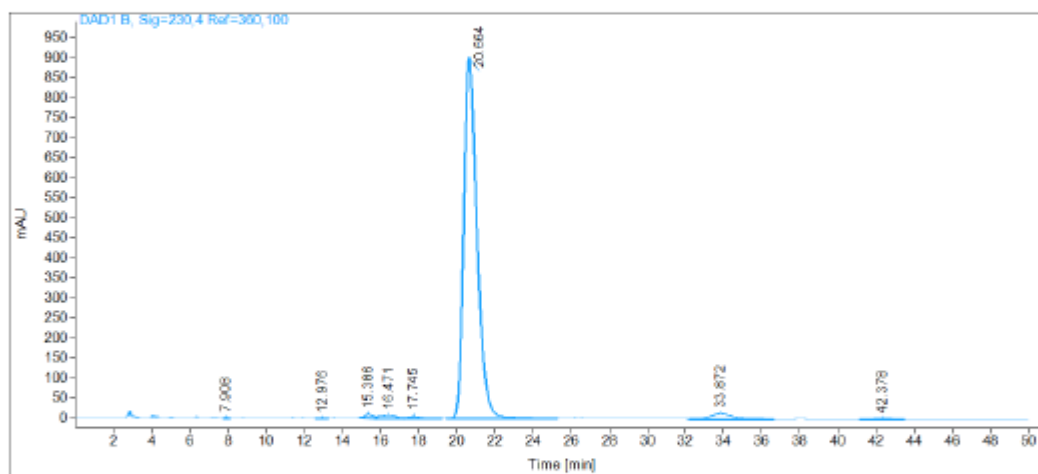

| Name     |      | Zou 267 TLC |          |        |             |
|----------|------|-------------|----------|--------|-------------|
| RT [min] | Type | Area%       | Area     | Height | Width [min] |
| 7.91     | BB   | 0.01        | 2.86     | 0.26   | 0.17        |
| 12.98    | BB   | 0.01        | 6.15     | 0.30   | 0.32        |
| 15.39    | BV   | 0.60        | 276.69   | 9.03   | 0.47        |
| 16.47    | VV   | 0.99        | 454.73   | 8.77   | 0.75        |
| 17.74    | VB   | 0.43        | 196.92   | 5.07   | 0.60        |
| 20.66    | BB   | 95.60       | 43904.68 | 902.04 | 0.75        |
| 33.87    | BB   | 2.23        | 1024.99  | 13.29  | 1.17        |
| 42.38    | BB   | 0.12        | 56.38    | 0.91   | 0.75        |
| Sum      |      | 100.00      | 45923.40 |        |             |

$^1\text{H}$  NMR of **4b**





# Chiral HPLC analysis: rac-4b

AK Enders - Analytische HPLC

Sample Name: Zou 189 neu  
 Data file: D:\GONZO\ZOU\189RXAD.D  
 Sample Info: Laufmittel: n-Heptan/IP 97:3  
 Die Probe ist in LM/DCM gelöst

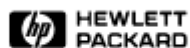

Säule: DAICELAD.M  
 Säuleninfo: Chiralpak AD (250x4,6)mm  
 Operator: Analytik Labor AKEN

Injektion Time: 18:33:58  
 Injektion Date: 21.08.2014

|                        |          |         |
|------------------------|----------|---------|
| Instrument Conditions: | At Start | At Stop |
| Temperature in °C:     | 30.0 °C  | 30.0 °C |
| Pressure in bar:       | 4.3      | 4.6     |
| Flow in ml/min:        | 0.30     | 0.30    |

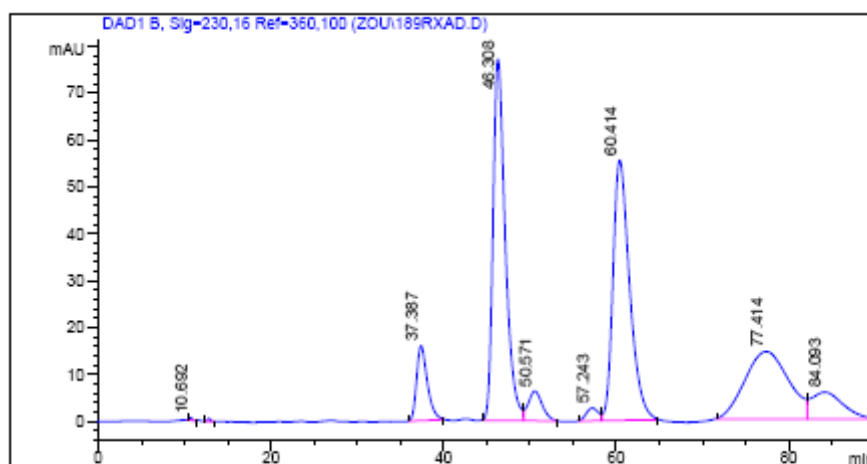

| #            | Ret. Time (min) | Width | Height (mAU) | Area (mAU*s)    | Area %        |
|--------------|-----------------|-------|--------------|-----------------|---------------|
| 1            | 10.69           | 0.30  | 0.60         | 13.08           | 0.05          |
| 2            | 12.78           | 0.32  | 0.62         | 14.32           | 0.06          |
| 3            | 37.39           | 1.19  | 15.92        | 1378.61         | 5.76          |
| 4            | 46.31           | 1.45  | 76.97        | 7569.19         | 31.61         |
| 5            | 50.57           | 1.37  | 6.34         | 723.80          | 3.02          |
| 6            | 57.24           | 1.16  | 2.72         | 264.11          | 1.10          |
| 7            | 60.41           | 1.96  | 55.47        | 7445.76         | 31.10         |
| 8            | 77.41           | 4.12  | 14.39        | 5058.72         | 21.13         |
| 9            | 84.09           | 3.00  | 5.77         | 1475.01         | 6.16          |
| <b>Total</b> |                 |       |              | <b>23942.62</b> | <b>100.00</b> |

# Chiral HPLC analysis: 4b

AK Enders - Analytische HPLC

Sample Name: Zou 326  
 Data file: D:\GONZO\ZOU\326AD.D  
 Sample Info: Laufmittel: n-Heptan/IP 97:3  
 Die Probe ist in LM/DCM gelöst

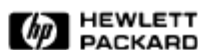

Säule: DAICELAD.M  
 Säuleninfo: Chiralpak AD (250x4,6)mm  
 Operator: Analytik Labor AKEN

Injektion Time: 15:31:22  
 Injektion Date: 21.08.2014

|                        |          |         |
|------------------------|----------|---------|
| Instrument Conditions: | At Start | At Stop |
| Temperature in °C:     | 30.0°C   | 30.0°C  |
| Pressure in bar:       | 4.3      | 4.7     |
| Flow in ml/min:        | 0.30     | 0.30    |

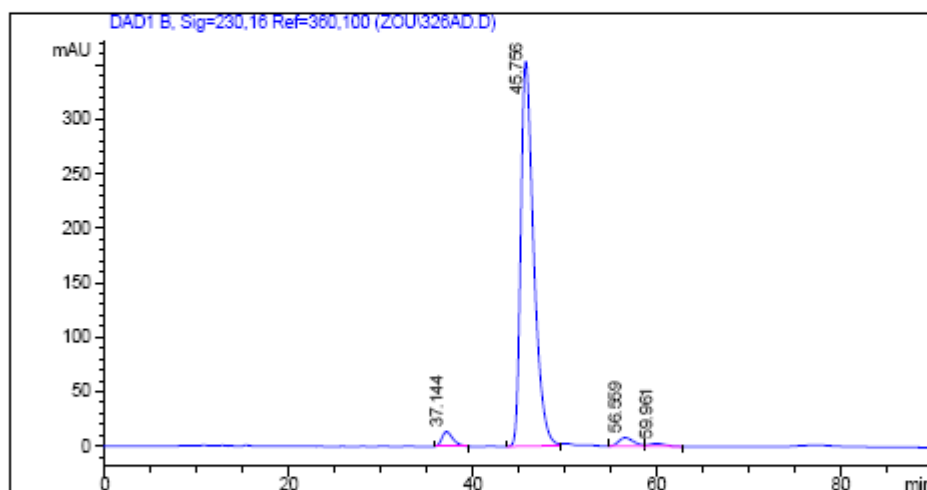

| #     | Ret. Time (min) | Width | Height (mAU) | Area (mAU*s) | Area % |
|-------|-----------------|-------|--------------|--------------|--------|
| 1     | 37.14           | 1.24  | 13.67        | 1175.15      | 3.19   |
| 2     | 45.76           | 1.44  | 353.50       | 34477.43     | 93.46  |
| 3     | 56.56           | 1.37  | 7.88         | 910.82       | 2.47   |
| 4     | 59.96           | 1.46  | 2.65         | 328.09       | 0.89   |
| Total |                 |       |              | 36891.49     | 100.00 |

# <sup>1</sup>H NMR of 4c

e/zou\_318

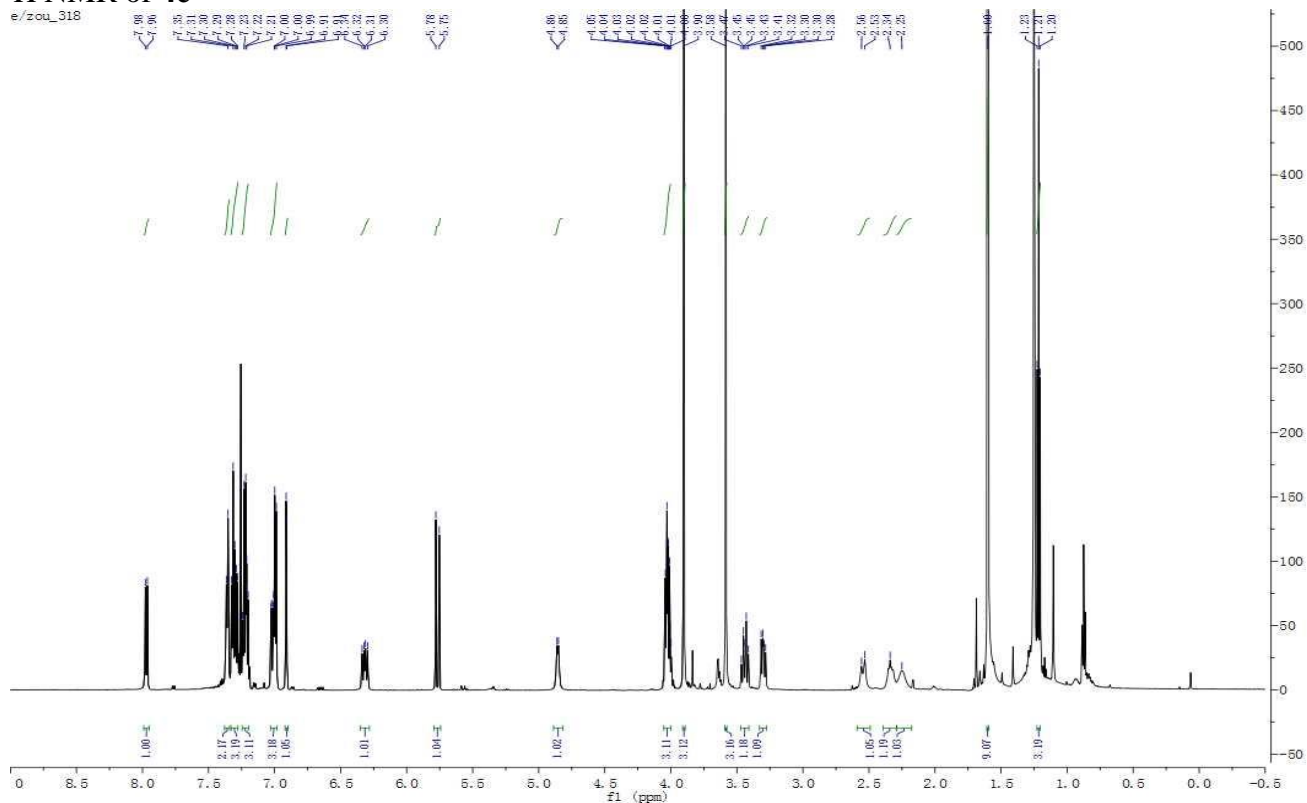

# <sup>13</sup>C NMR of 4c

e/zou\_318

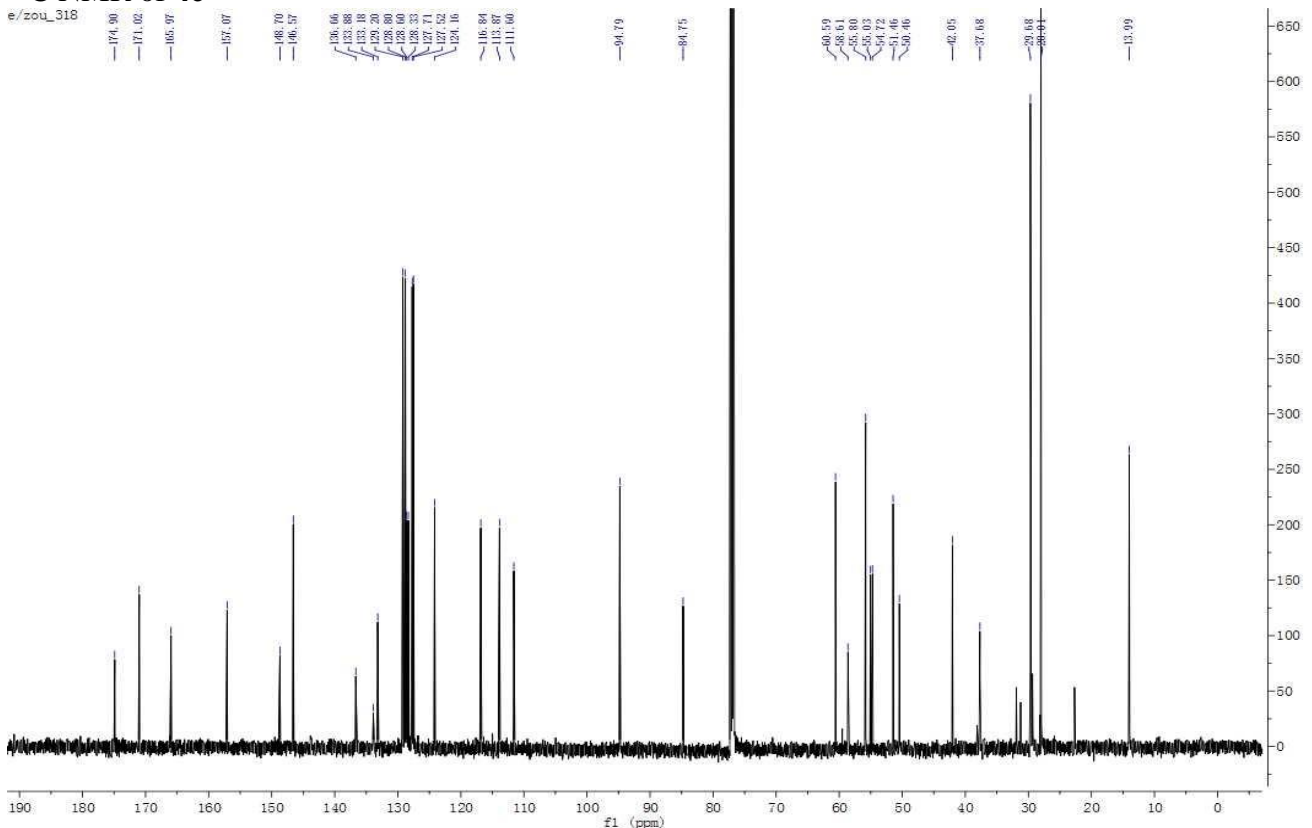

# Chiral HPLC analysis: rac-4c

AK Prof. Enders - Analytiklabor 4.04

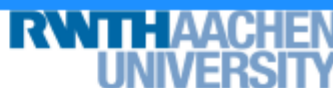

**Sample name:** Zou 344 rac  
**Data file:** C:\SNOOPY\ZOU\344RIA.D  
**Description:** Laufmittel: n-Heptan/IP 95:5;  
 Probe ist in LM/DCM gelöst.  
**Injection date:** 8/28/2014 5:28:02 PM  
**Acq. Analysis method:** CHIRALPAKIARNP.M

**Column:** Chiralpak IA, (250 x 4,6) mm, 5 $\mu$ , SN: IA00CE-RC036

**Pressure at start:** 33 bar      **Start flow:** 0.700 ml/min      **Column oven:** 30 °C

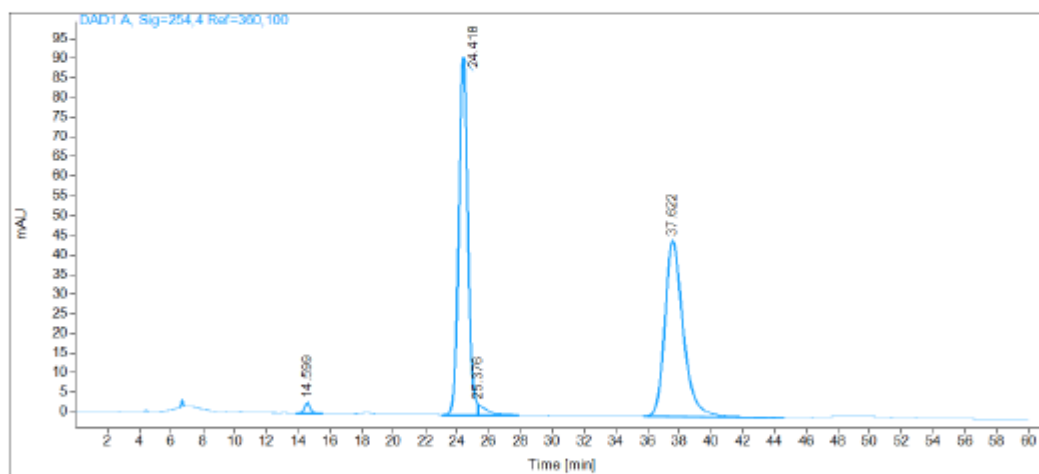

| Name     | Zou 344 rac |        |         |        |             |  |
|----------|-------------|--------|---------|--------|-------------|--|
| RT [min] | Type        | Area%  | Area    | Height | Width [min] |  |
| 14.60    | BB          | 0.88   | 65.10   | 2.50   | 0.40        |  |
| 24.42    | MF          | 48.96  | 3636.45 | 91.15  | 0.66        |  |
| 25.38    | FM          | 1.32   | 98.23   | 2.57   | 0.64        |  |
| 37.62    | BB          | 48.84  | 3627.65 | 44.74  | 1.23        |  |
|          | Sum         | 100.00 | 7427.43 |        |             |  |

# Chiral HPLC analysis: 4c

AK Prof. Enders - Analytiklabor 4.04

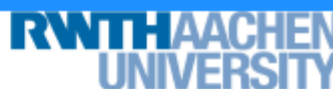

Sample name: Zou 318

Data file: C:\SNOOPY\ZOU\318IA.D

Description: Laufmittel: n-Heptan/IP 95:5;  
Probe ist in LM/DCM gelöst.

Injection date: 9/1/2014 4:16:44 PM

Acq. Analysis method: CHIRALPAKIARNP.M

Column: Chiralpak IA, (250 x 4,6) mm, 5µ, SN: IA00CE-RC036

Pressure at start: 32 bar

Start flow: 0.700 ml/min

Column oven: 29.99 °C

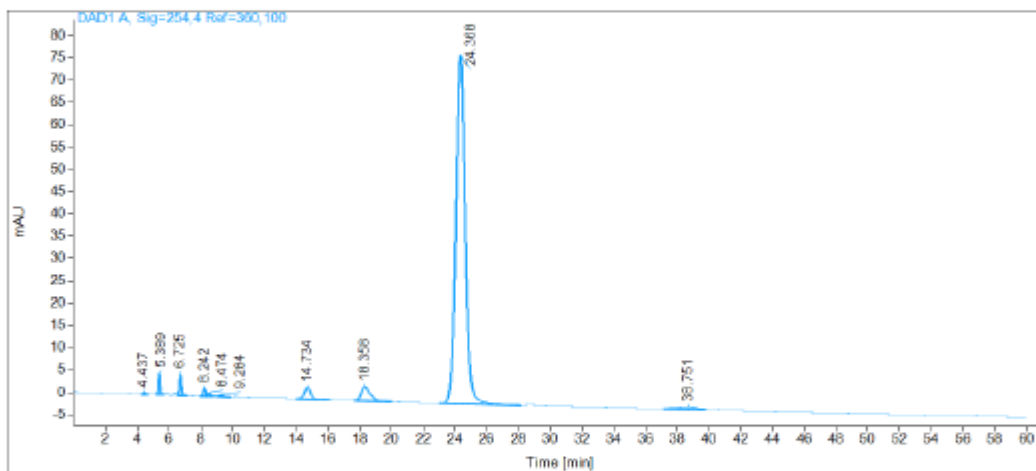

| Name     | Zou 318 |        |         |        |             |  |
|----------|---------|--------|---------|--------|-------------|--|
| RT [min] | Type    | Area%  | Area    | Height | Width [min] |  |
| 4.44     | BV      | 0.10   | 3.69    | 0.42   | 0.13        |  |
| 5.39     | VV      | 1.07   | 37.86   | 4.81   | 0.12        |  |
| 6.72     | VB      | 1.09   | 38.53   | 4.73   | 0.12        |  |
| 8.24     | BV      | 0.48   | 17.03   | 1.74   | 0.15        |  |
| 8.47     | VB      | 0.29   | 10.06   | 0.74   | 0.20        |  |
| 9.28     | BB      | 0.19   | 6.61    | 0.40   | 0.25        |  |
| 14.73    | BB      | 2.15   | 75.78   | 2.68   | 0.42        |  |
| 18.36    | VB      | 3.51   | 123.99  | 3.16   | 0.57        |  |
| 24.37    | BB      | 89.90  | 3171.61 | 78.09  | 0.62        |  |
| 38.75    | MM      | 1.22   | 42.91   | 0.50   | 1.42        |  |
|          | Sum     | 100.00 | 3528.06 |        |             |  |

# <sup>1</sup>H NMR of 4d

e/Zou\_300

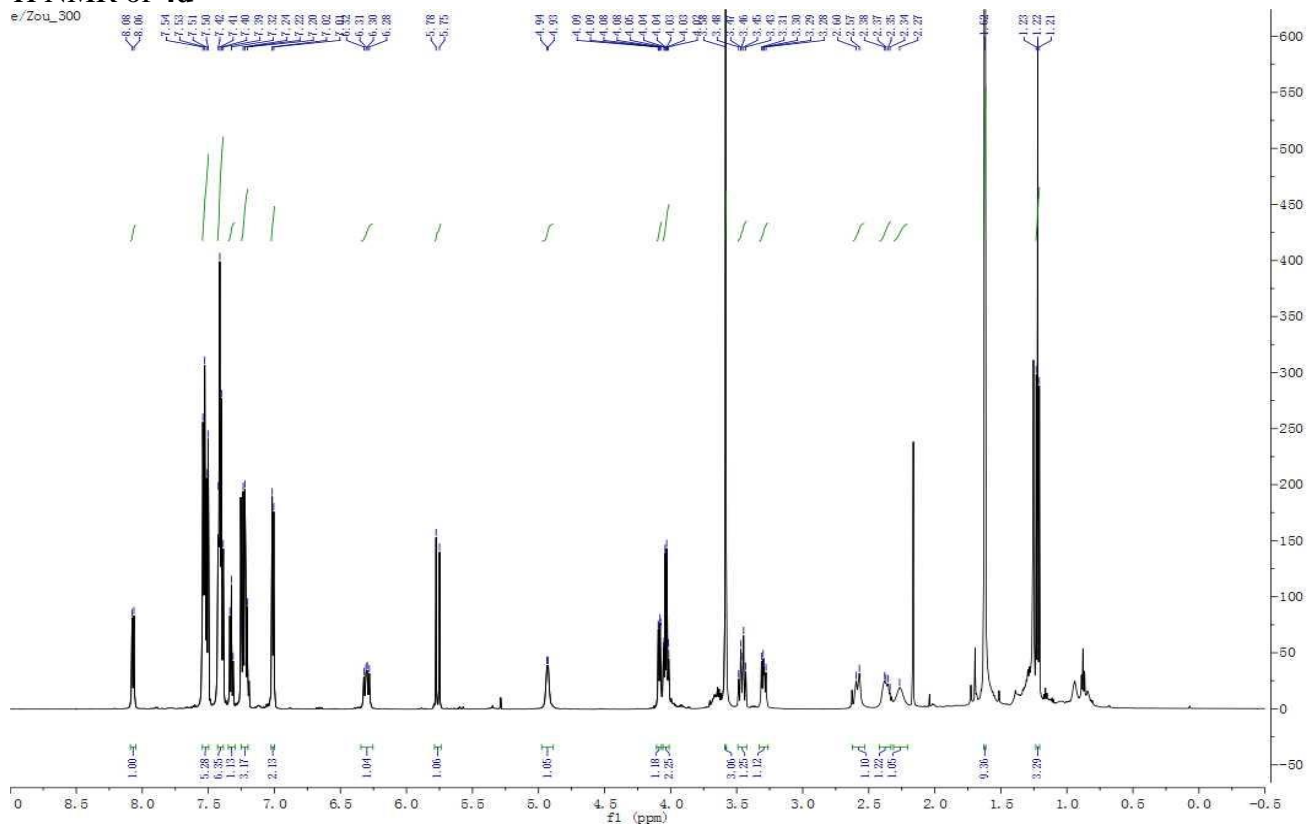

# <sup>13</sup>C NMR of 4d

e/Zou\_300

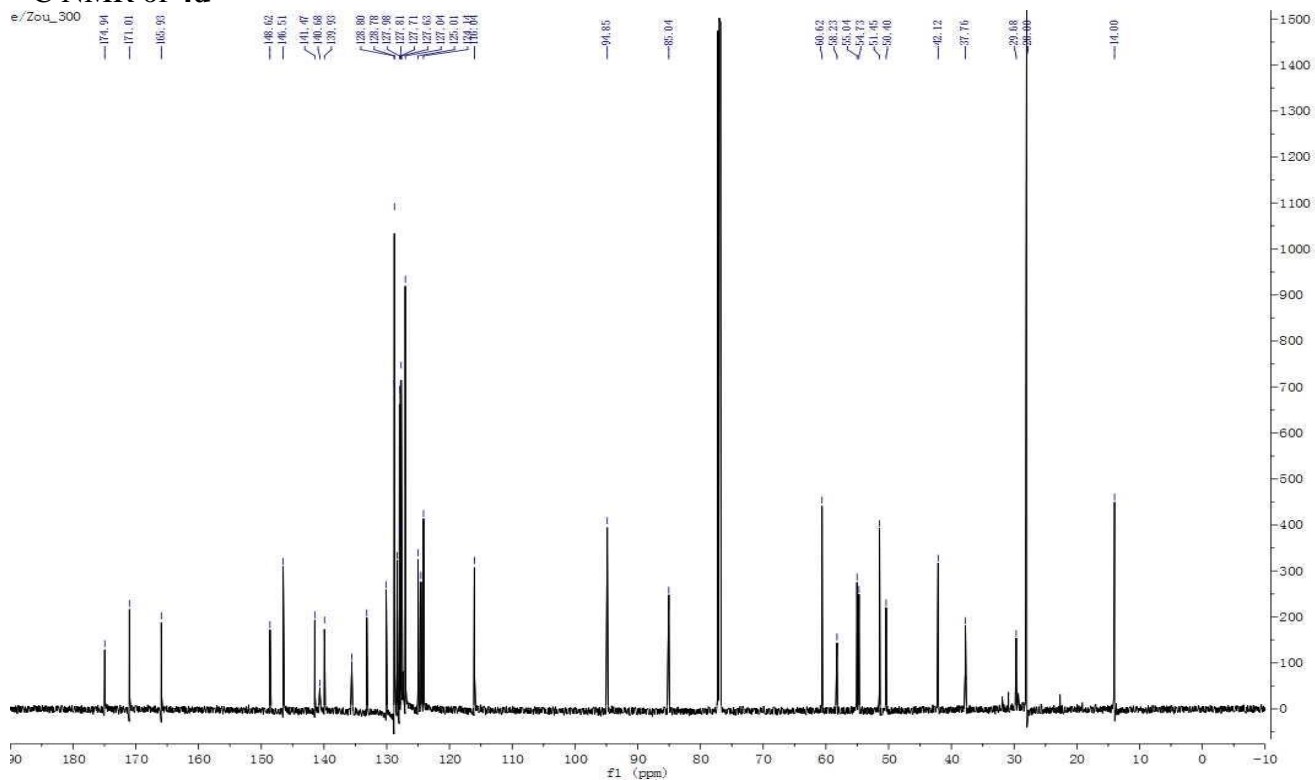

# Chiral HPLC analysis: rac-4d

AK Enders - Analytische HPLC

Sample Name: Zou 299 rac  
 Data file: D:\BERT\ZOU\299RW.D  
 Sample Info: Laufmittel: n-Heptan/EtOH 7:3;  
 Die Probe ist in DCM/LM gelöst

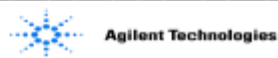

Säule: WHELK.M  
 Säuleninfo: (s,s)-Whelk O1 (250x4,6)mm

Operator: Analytik Labor AKEN

Injektion Time: 14:44:44  
 Injektion Date: 10.07.2014

| Instrument Conditions: | At Start | At Stop |
|------------------------|----------|---------|
| Temperature in °C:     | 30.0     | 30.0    |
| Pressure in bar:       | 47.4     | 47.4    |
| Flow in ml/min:        | 0.7      | 0.7     |

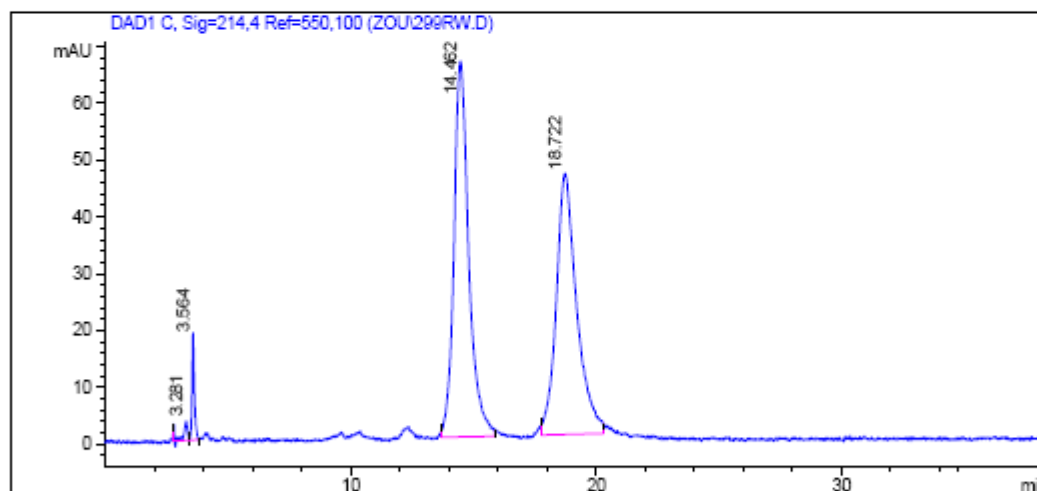

| #     | Ret. Time (min) | Width | Height (mAU) | Area (mAU*s) | Area % |
|-------|-----------------|-------|--------------|--------------|--------|
| 1     | 3.28            | 0.17  | 3.35         | 39.21        | 0.70   |
| 2     | 3.56            | 0.10  | 18.25        | 121.85       | 2.17   |
| 3     | 14.46           | 0.62  | 66.09        | 2780.72      | 49.70  |
| 4     | 18.72           | 0.80  | 45.91        | 2653.62      | 47.43  |
| Total |                 |       |              | 5595.11      | 100.00 |

# Chiral HPLC analysis: 4d

AK Enders - Analytische HPLC

Sample Name: Zou 300  
 Data file: D:\BERT\ZOU\300W.D  
 Sample Info: Laufmittel: n-Heptan/EtOH 7:3;  
 Die Probe ist in DCM/LM gelöst

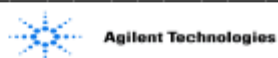

Säule: WHELK.M  
 Säuleninfo: (s,s)-Whelk O1 (250x4,6)mm

Operator: Analytik Labor AKEN

Injektion Time: 15:01:54  
 Injektion Date: 14.07.2014

| Instrument Conditions: | At Start | At Stop |
|------------------------|----------|---------|
| Temperature in °C:     | 30.0     | 30.0    |
| Pressure in bar:       | 47.2     | 47.6    |
| Flow in ml/min:        | 0.7      | 0.7     |

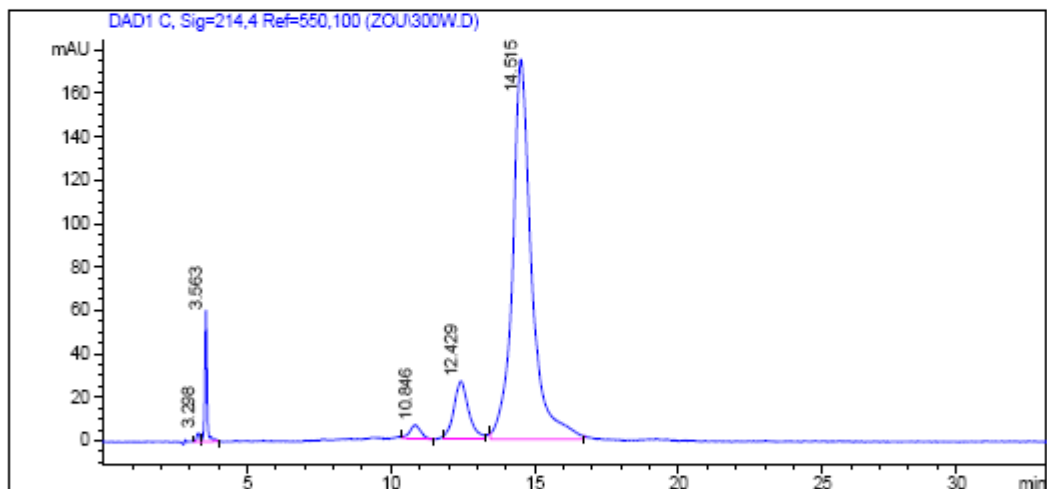

| #     | Ret. Time (min) | Width | Height (mAU) | Area (mAU*s) | Area % |
|-------|-----------------|-------|--------------|--------------|--------|
| 1     | 3.30            | 0.12  | 3.86         | 30.45        | 0.32   |
| 2     | 3.56            | 0.09  | 58.69        | 330.51       | 3.44   |
| 3     | 10.85           | 0.40  | 6.39         | 171.00       | 1.78   |
| 4     | 12.43           | 0.52  | 26.66        | 968.36       | 10.08  |
| 5     | 14.51           | 0.67  | 175.10       | 8102.05      | 84.38  |
| Total |                 |       |              | 9602.37      | 100.00 |



### <sup>1</sup>H NMR of 4e

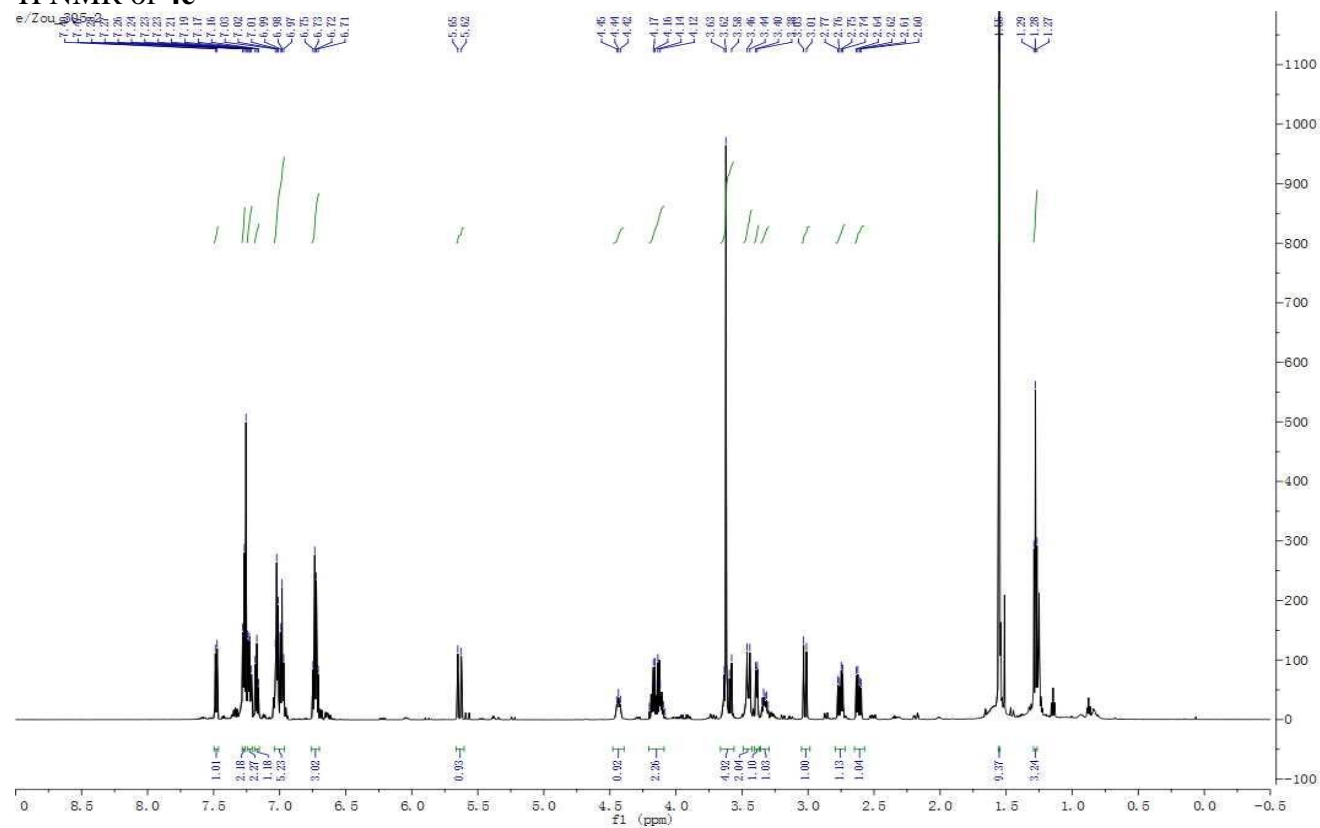

### <sup>13</sup>C NMR of 4e

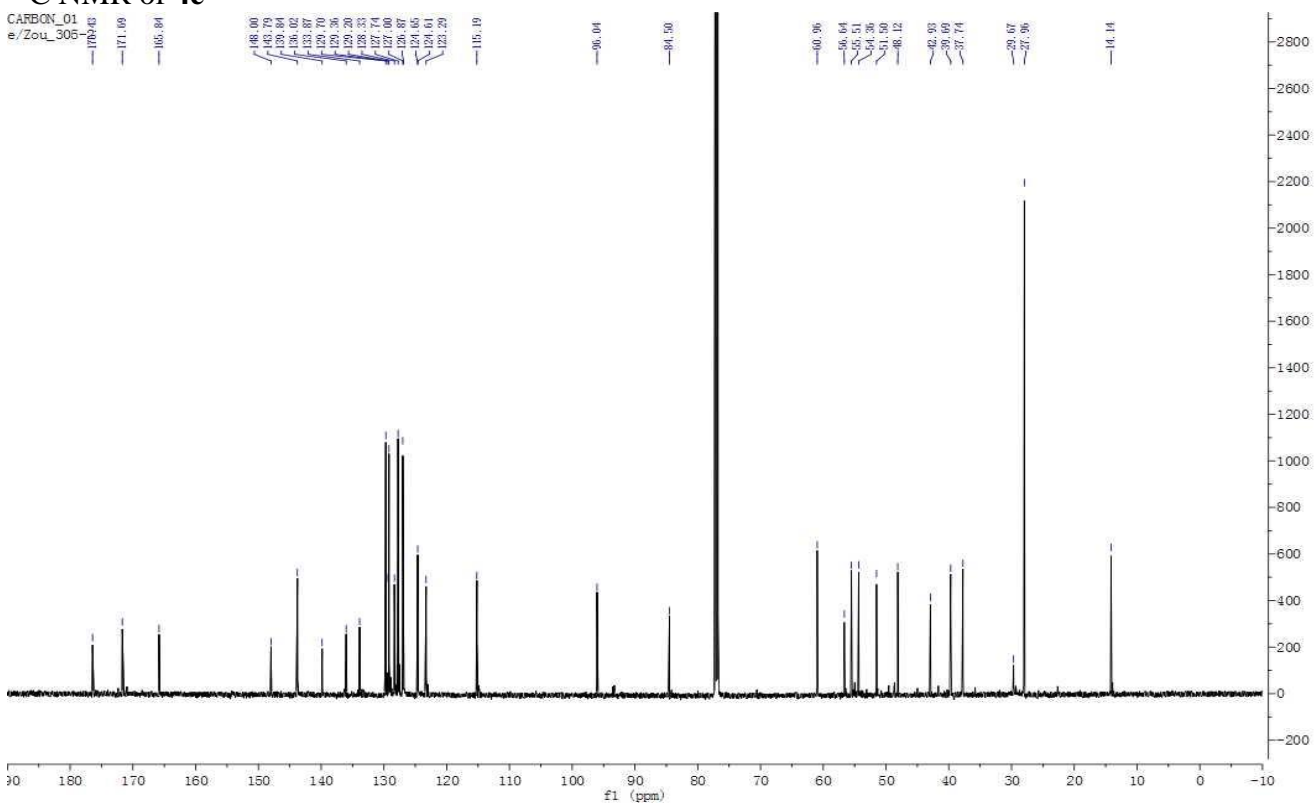

# Chiral HPLC analysis: rac-4e

AK Prof. Enders - Analytiklabor 4.04

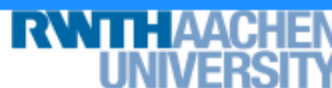

**Sample name:** Zou 356 + 349 T  
**Data file:** C:\SNOOPY\ZOU\ZOU 356 + 349 T IA.D  
**Description:** Laufmittel: n-Heptan/EtOH 7:3 Die Probe ist DCM/LM gelöst.

**Injection date:** 9/15/2014 2:03:59 PM  
**Acq. Analysis method:** CHIRALPAKIARNP.M

**Column:** Chiralpak IA, (250 x 4,6) mm, 5µ, SN: IA00CE-RC036

**Pressure at start:** 30 bar      **Start flow:** 0.500 ml/min      **Column oven:** 29.99 °C

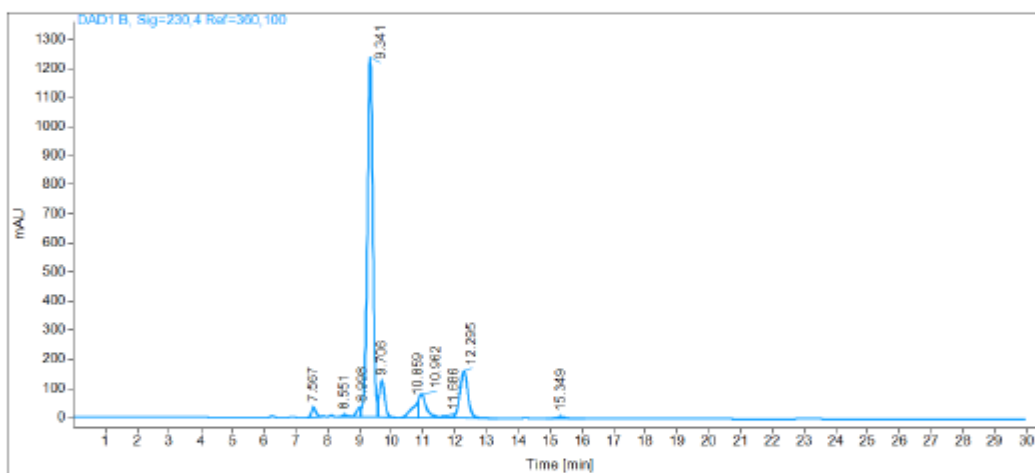

| Name     | Zou 356 + 349 T |        |          |         |             |  |
|----------|-----------------|--------|----------|---------|-------------|--|
| RT [min] | Type            | Area%  | Area     | Height  | Width [min] |  |
| 7.57     | BV              | 1.47   | 324.54   | 32.92   | 0.15        |  |
| 8.55     | BB              | 0.35   | 78.16    | 6.95    | 0.17        |  |
| 9.00     | BV              | 1.25   | 276.37   | 30.35   | 0.14        |  |
| 9.34     | VV              | 66.09  | 14582.02 | 1235.90 | 0.18        |  |
| 9.71     | VB              | 7.04   | 1554.16  | 125.07  | 0.19        |  |
| 10.86    | MF              | 3.52   | 776.32   | 59.00   | 0.22        |  |
| 10.96    | FM              | 5.94   | 1311.59  | 81.93   | 0.27        |  |
| 11.69    | VV              | 0.45   | 98.51    | 5.84    | 0.25        |  |
| 12.30    | VB              | 13.25  | 2923.73  | 162.50  | 0.28        |  |
| 15.35    | BB              | 0.63   | 138.36   | 6.14    | 0.35        |  |
| Sum      |                 | 100.00 | 22063.76 |         |             |  |

# Chiral HPLC analysis: 4e

AK Prof. Enders - Analytiklabor 4.04

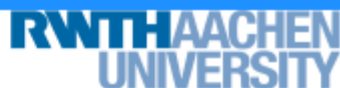

**Sample name:** Zou 356  
**Data file:** C:\SNOOPY\ZOU\356\IA.D  
**Description:** Laufmittel: n-Heptan/EtOH 7:3;  
 Probe ist in LM/DCM gelöst.  
**Injection date:** 9/15/2014 12:19:06 PM  
**Acq. Analysis method:** CHIRALPAKIARNP.M

**Column:** Chiralpak IA, (250 x 4,6) mm, 5µ, SN: IA00CE-RC038

**Pressure at start:** 30 bar      **Start flow:** 0.500 ml/min      **Column oven:** 30.01 °C

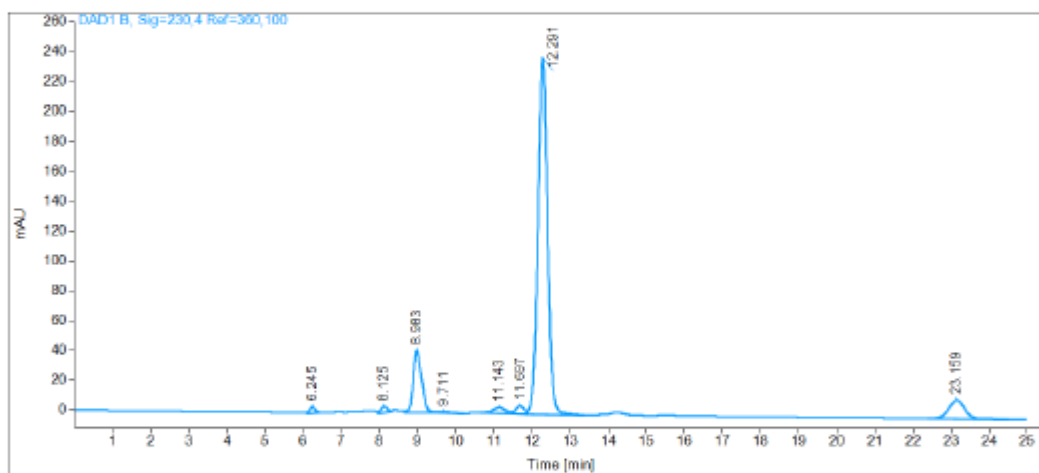

| Name     | Zou 356 |        |         |        |             |  |
|----------|---------|--------|---------|--------|-------------|--|
| RT [min] | Type    | Area%  | Area    | Height | Width [min] |  |
| 6.25     | MM      | 0.79   | 43.70   | 4.30   | 0.17        |  |
| 8.13     | MM      | 0.89   | 48.78   | 4.25   | 0.19        |  |
| 8.98     | VV      | 11.51  | 632.99  | 41.36  | 0.22        |  |
| 9.71     | VB      | 0.32   | 17.60   | 0.96   | 0.27        |  |
| 11.14    | BV      | 1.64   | 90.07   | 3.81   | 0.36        |  |
| 11.70    | VV      | 1.44   | 79.25   | 5.30   | 0.23        |  |
| 12.29    | VB      | 78.79  | 4223.29 | 238.83 | 0.27        |  |
| 23.16    | BBA     | 6.62   | 364.28  | 12.53  | 0.45        |  |
|          | Sum     | 100.00 | 5499.96 |        |             |  |

# <sup>1</sup>H NMR of 4f

e/zou\_321

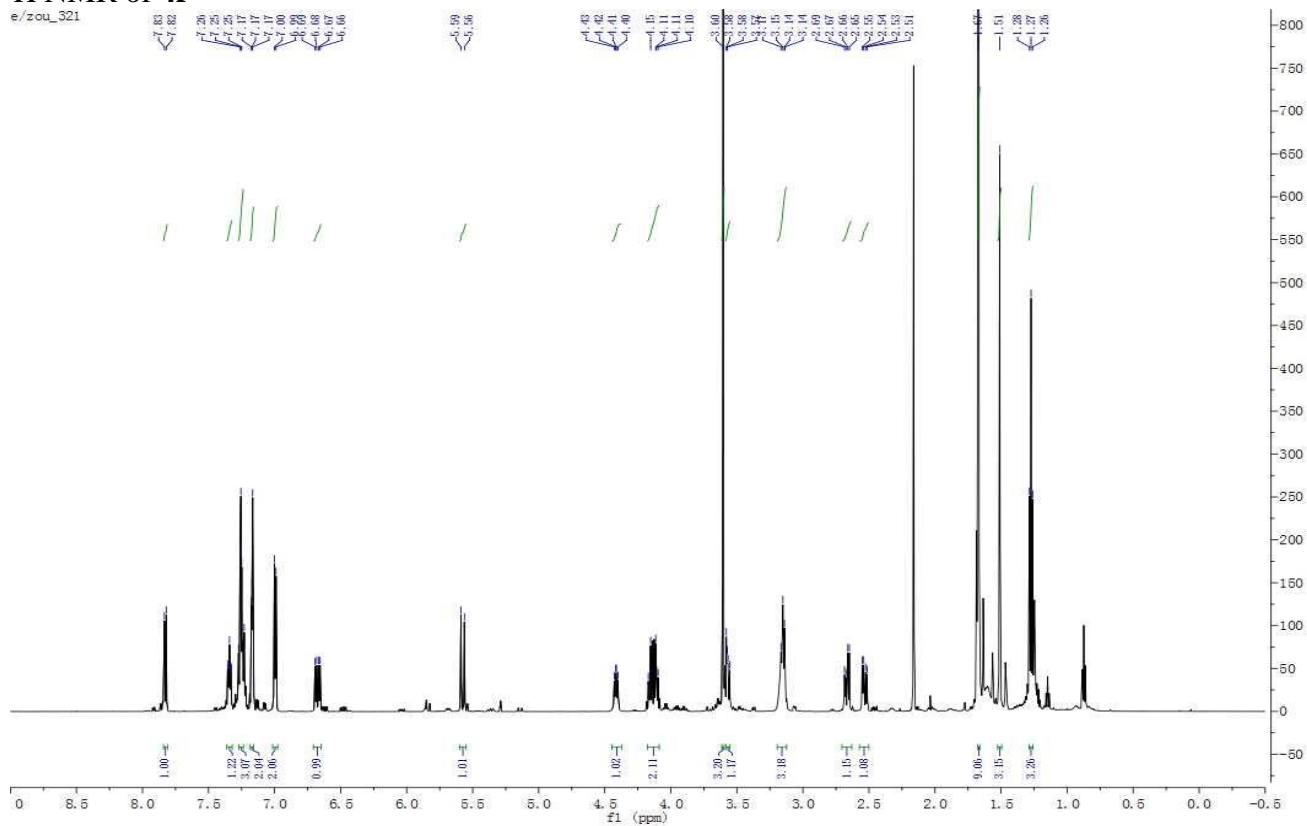

# <sup>13</sup>C NMR of 4f

e/zou\_321

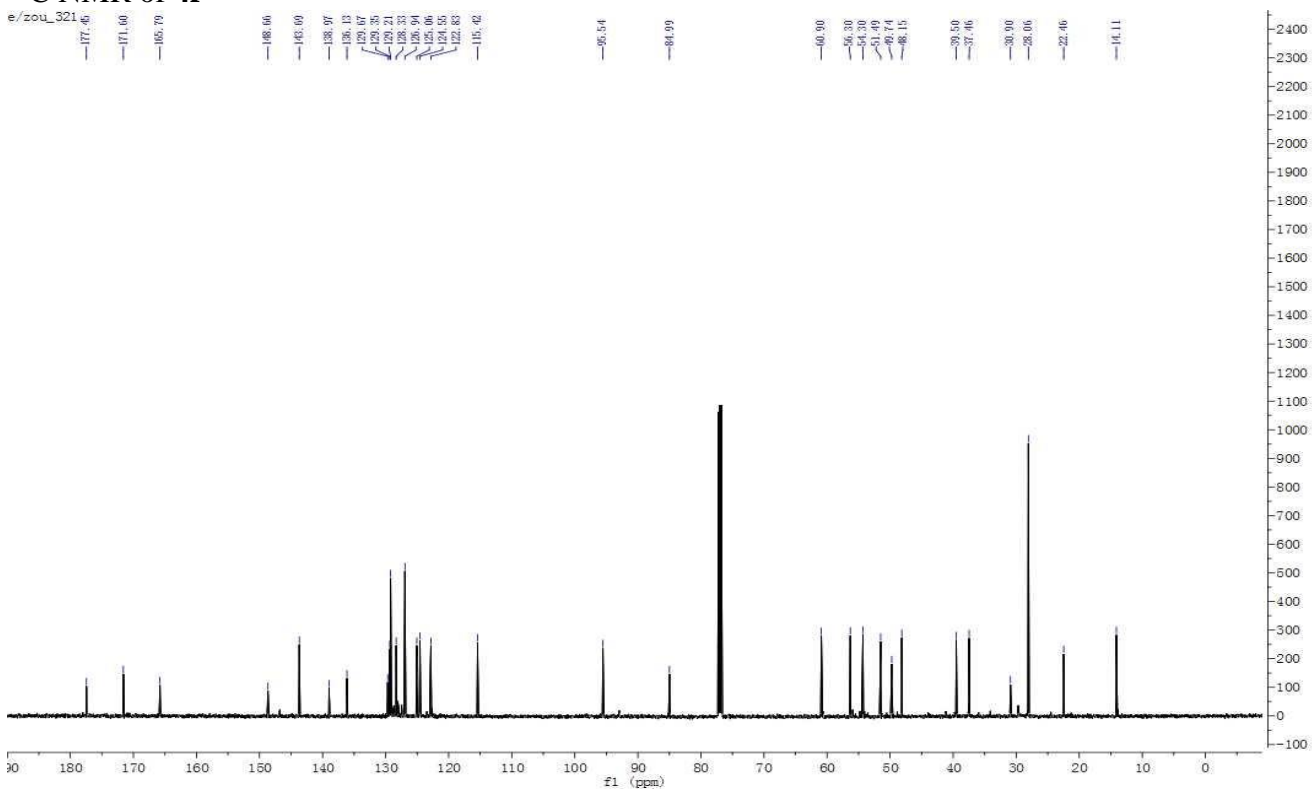

# Chiral HPLC analysis: rac-4f

AK Prof. Enders - Analytiklabor 4.04

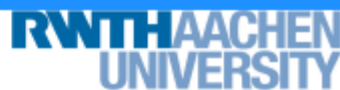

Sample name: Zou 190 rac

Data file: C:\SNOOPY\ZOU\190RXIA.D

Description: Laufmittel: n-Heptan/IP 95:5;  
Probe ist in LM/DCM gelöst.

Injection date: 8/21/2014 11:55:37 AM

Acq. Analysis method: CHIRALPAKIARNP.M

Column: Chiralpak IA, (250 x 4,6) mm, 5µ, SN: IA00CE-RC036

Pressure at start: 32 bar      Start flow: 0.700 ml/min      Column oven: 29.98 °C

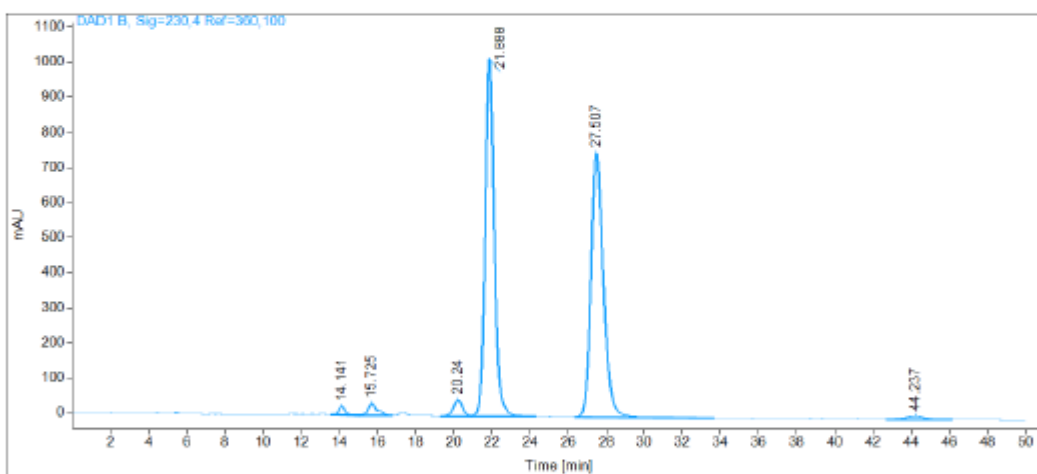

| Name     |      | Zou 190 rac |          |         |             |  |
|----------|------|-------------|----------|---------|-------------|--|
| RT [min] | Type | Area%       | Area     | Height  | Width [min] |  |
| 14.14    | BV   | 0.80        | 573.74   | 23.76   | 0.36        |  |
| 15.73    | VV   | 1.51        | 1089.98  | 33.25   | 0.47        |  |
| 20.24    | BV   | 2.08        | 1501.04  | 46.64   | 0.50        |  |
| 21.89    | VV   | 47.61       | 34315.27 | 1018.71 | 0.51        |  |
| 27.51    | VB   | 47.00       | 33875.26 | 752.95  | 0.68        |  |
| 44.24    | VB   | 1.00        | 719.29   | 10.13   | 1.08        |  |
| Sum      |      | 100.00      | 72074.58 |         |             |  |

# Chiral HPLC analysis: 4f

AK Prof. Enders - Analytiklabor 4.04

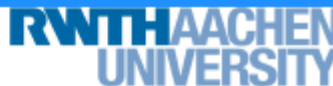

**Sample name:** Zou 321 down  
**Data file:** C:\SNOOPY\ZOU\321\DOIA.D  
**Description:** Laufmittel: n-Heptan/IP 95:5;  
 Probe ist in LM/DCM gelöst.  
**Injection date:** 8/21/2014 1:47:51 PM  
**Acq. Analysis method:** CHIRALPAKIARNP.M

**Column:** Chiralpak IA, (250 x 4,6) mm, 5µ, SN: IA00CE-RC036

**Pressure at start:** 32 bar      **Start flow:** 0.700 ml/min      **Column oven:** 30.01 °C

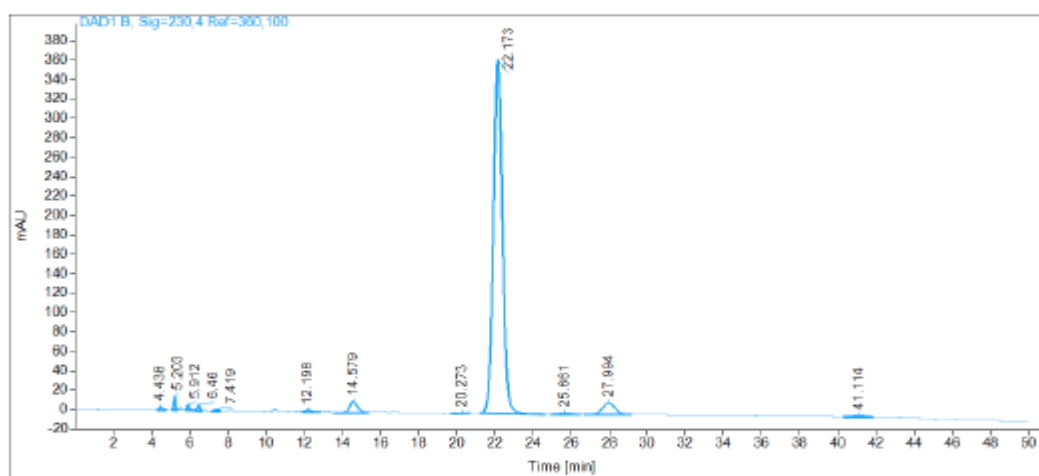

| Name     |      | Zou 321 down |          |        |             |  |
|----------|------|--------------|----------|--------|-------------|--|
| RT [min] | Type | Area%        | Area     | Height | Width [min] |  |
| 4.44     | VV   | 0.36         | 48.63    | 4.16   | 0.16        |  |
| 5.20     | VB   | 0.65         | 86.57    | 14.77  | 0.09        |  |
| 5.91     | BV   | 0.33         | 44.74    | 6.57   | 0.11        |  |
| 6.46     | VV   | 0.43         | 57.67    | 6.30   | 0.13        |  |
| 7.42     | BV   | 0.18         | 24.20    | 1.98   | 0.18        |  |
| 12.20    | VB   | 0.39         | 52.77    | 1.89   | 0.41        |  |
| 14.58    | BV   | 2.50         | 334.89   | 11.86  | 0.42        |  |
| 20.27    | BB   | 0.16         | 21.64    | 0.73   | 0.48        |  |
| 22.17    | BB   | 89.70        | 12034.51 | 364.83 | 0.51        |  |
| 25.66    | BB   | 0.58         | 78.36    | 2.03   | 0.59        |  |
| 27.99    | BB   | 4.03         | 540.81   | 12.05  | 0.69        |  |
| 41.11    | MM   | 0.68         | 91.71    | 1.62   | 0.94        |  |
|          | Sum  | 100.00       | 13416.51 |        |             |  |

# <sup>1</sup>H NMR of 4g

e/zou\_316

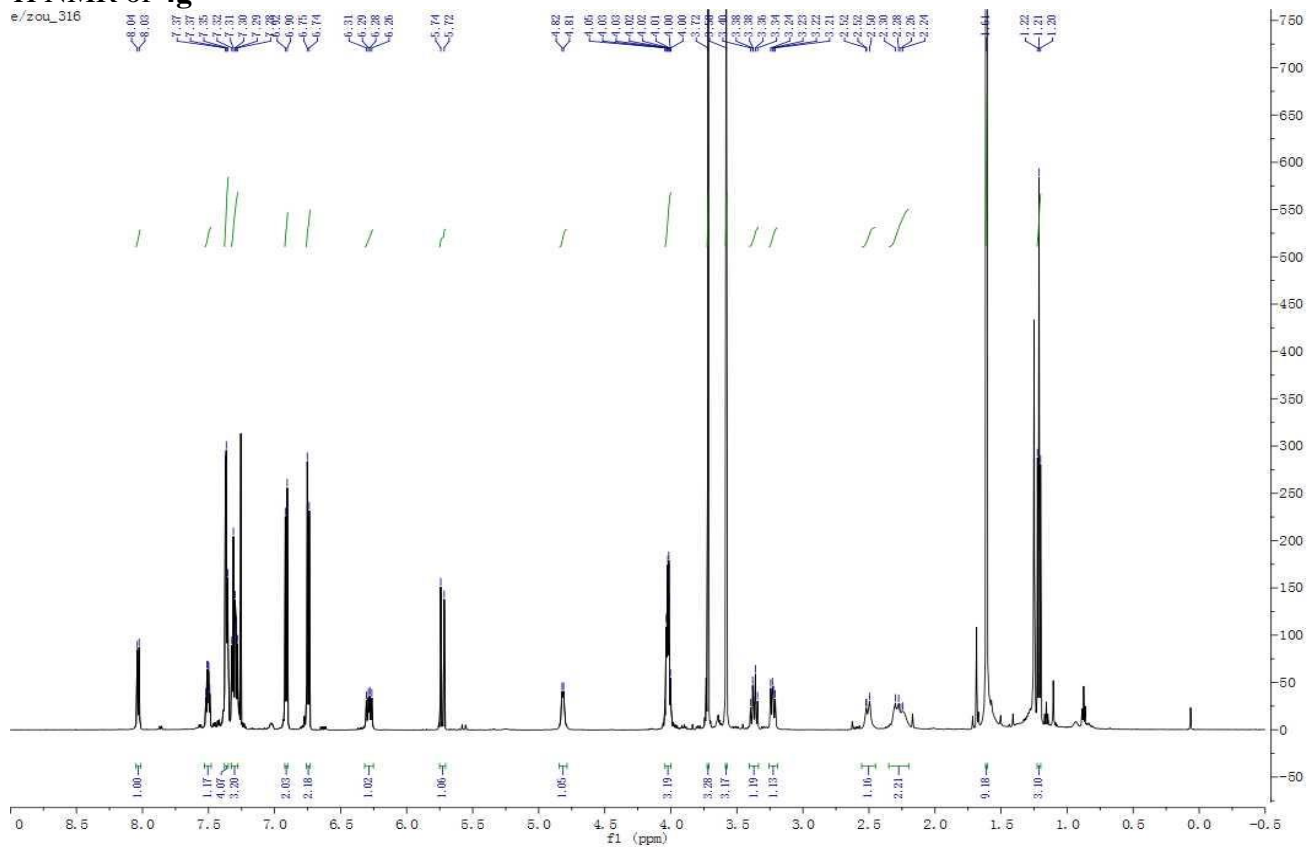

# <sup>13</sup>C NMR of 4g

e/zou\_316

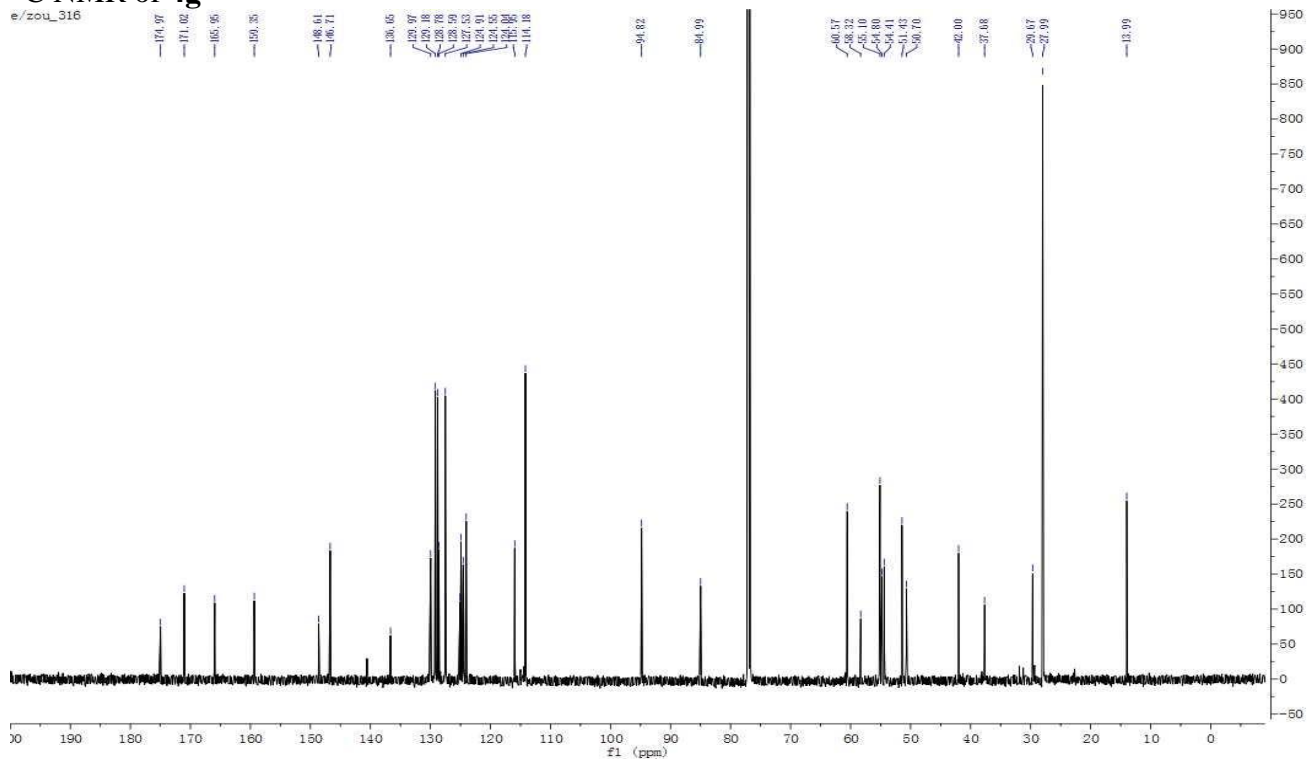

# Chiral HPLC analysis: rac-4g

AK Prof. Enders - Analytiklabor 4.04

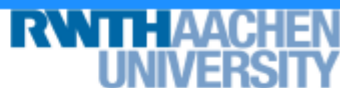

Sample name: Zou 262 rac  
 Data file: C:\SNOOPY\ZOU\ZOU 262 RAC ZIC.D  
 Description: Laufmittel: n-Heptan/IP 7:3 Die Probe ist DCM/LM gelöst.

Injection date: 7/9/2014 11:35:31 AM  
 Acq. Analysis method: CHIRALPAKIC1-8LNP.M

Column: Chiralpak IC, (150 x 4,6) mm, 5µ, SN: IC00CD-QF015

Pressure at start: 23 bar Start flow: 0.500 ml/min Column oven: 30 °C

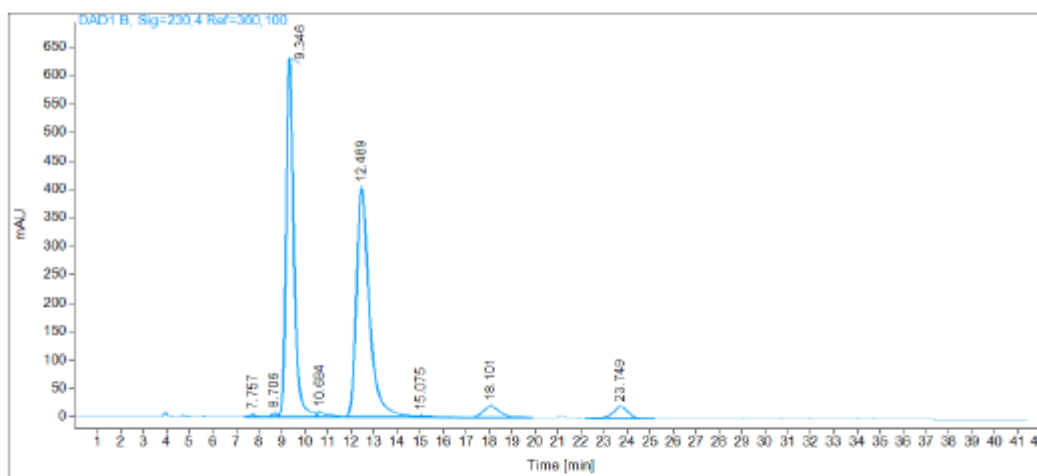

| Name     |      | Zou 262 rac |          |        |             |  |
|----------|------|-------------|----------|--------|-------------|--|
| RT [min] | Type | Area%       | Area     | Height | Width [min] |  |
| 7.76     | VB   | 0.24        | 81.29    | 3.66   | 0.33        |  |
| 8.71     | BV   | 0.33        | 108.54   | 5.87   | 0.28        |  |
| 9.35     | VV   | 44.93       | 14975.37 | 630.27 | 0.36        |  |
| 10.68    | VB   | 0.68        | 227.48   | 7.03   | 0.45        |  |
| 12.49    | BV   | 47.69       | 15894.60 | 401.00 | 0.60        |  |
| 15.07    | VB   | 0.41        | 137.93   | 2.61   | 0.75        |  |
| 18.10    | BV   | 3.01        | 1004.52  | 18.92  | 0.81        |  |
| 23.75    | BB   | 2.70        | 899.71   | 19.90  | 0.68        |  |
| Sum      |      | 100.00      | 33329.45 |        |             |  |



# Chiral HPLC analysis: 4g

AK Prof. Enders - Analytiklabor 4.04

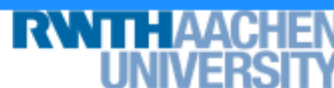

**Sample name:** Zou 325 TLC  
**Data file:** C:\SNOOPY\ZOU\325TLC.D  
**Description:** Laufmittel: n-Heptan/IP 7:3;  
 Probe ist in LM/DCM gelöst.  
**Injection date:** 8/25/2014 9:10:20 AM  
**Acq. Analysis method:** CHIRALPAKIC1-6LNP.M  
**Column:** Chiralpak IC, (150 x 4,6) mm, 5µ, SN: IC00CD-QF015

**Pressure at start:** 26 bar      **Start flow:** 0.500 ml/min      **Column oven:** 29.99 °C

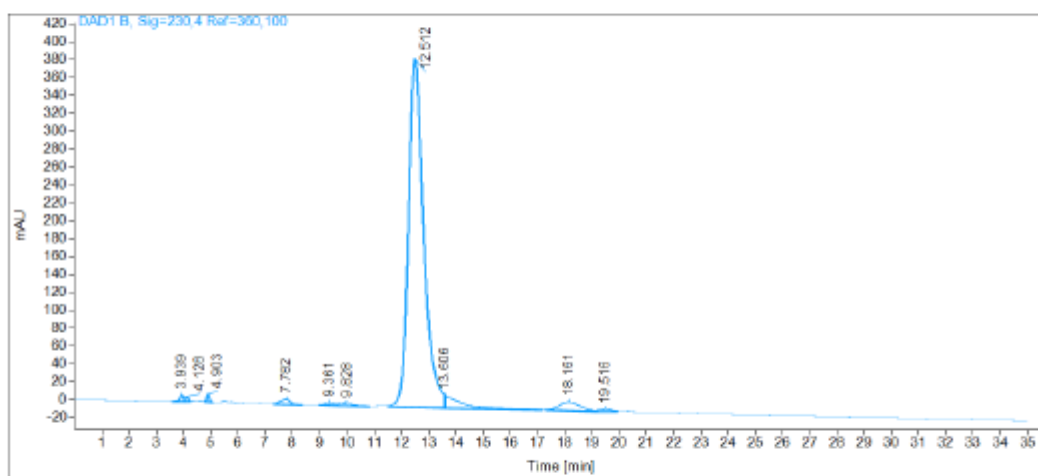

| Name     |      | Zou 325 TLC |          |        |             |  |
|----------|------|-------------|----------|--------|-------------|--|
| RT [min] | Type | Area%       | Area     | Height | Width [min] |  |
| 3.04     | BV   | 0.48        | 80.12    | 7.93   | 0.15        |  |
| 4.13     | VV   | 0.28        | 46.80    | 6.30   | 0.11        |  |
| 4.90     | VV   | 0.37        | 62.05    | 8.78   | 0.11        |  |
| 7.78     | BB   | 0.83        | 140.20   | 5.71   | 0.35        |  |
| 9.36     | BV   | 0.40        | 67.90    | 3.02   | 0.33        |  |
| 9.83     | VB   | 0.56        | 93.73    | 2.55   | 0.50        |  |
| 12.51    | MF   | 90.40       | 15233.67 | 389.64 | 0.65        |  |
| 13.61    | FM   | 3.28        | 553.13   | 14.27  | 0.65        |  |
| 18.16    | BV   | 2.92        | 492.76   | 9.82   | 0.75        |  |
| 19.52    | VV   | 0.48        | 80.24    | 2.63   | 0.45        |  |
| Sum      |      | 100.00      | 16850.60 |        |             |  |



# Chiral HPLC analysis: rac-4h

## AK Prof. Enders - Analytiklabor 4.04

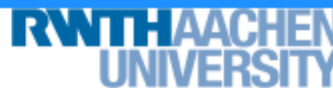

**Sample name:** Zou 263 rac  
**Data file:** C:\SNOOPY\ZOU\ZOU 263 RAC IC.D  
**Description:** Laufmittel: n-Heptan/EtOH 97:3 Die Probe ist DCM/LM gelöst.

**Injection date:** 6/26/2014 8:42:20 AM  
**Acq. Analysis method:** CHIRALPAKIC1-6LNP.M

**Column:** Chiralpak IC, (150 x 4,6) mm, 5µ, SN: IC00CD-QF015

**Pressure at start:** 27 bar      **Start flow:** 0.700 ml/min      **Column oven:** 29.98 °C

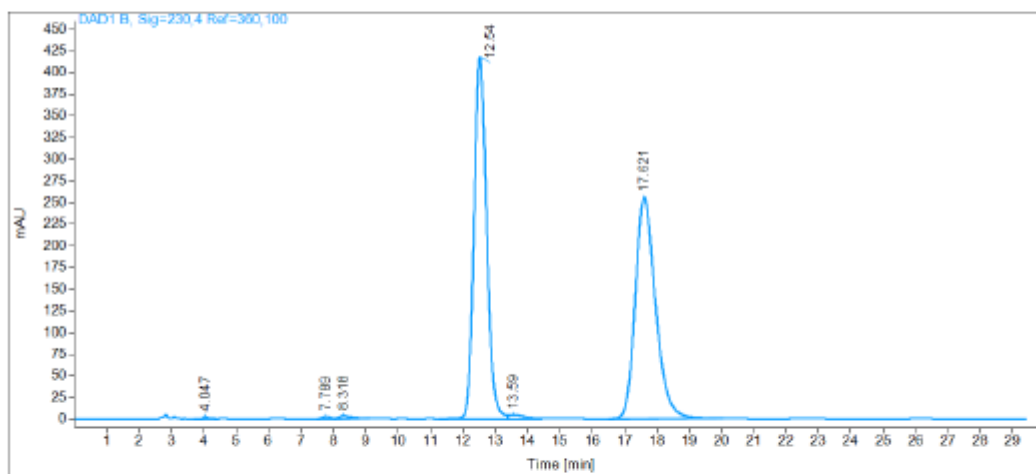

| Name     | Zou 263 rac |        |          |        |             |
|----------|-------------|--------|----------|--------|-------------|
| RT [min] | Type        | Area%  | Area     | Height | Width [min] |
| 4.05     | BV          | 0.15   | 33.86    | 3.02   | 0.15        |
| 7.79     | BV          | 0.20   | 46.68    | 3.02   | 0.24        |
| 8.32     | VB          | 0.46   | 105.17   | 3.57   | 0.41        |
| 12.54    | BV          | 49.46  | 11281.25 | 417.56 | 0.42        |
| 13.59    | VV          | 0.74   | 169.44   | 4.73   | 0.53        |
| 17.62    | BB          | 48.98  | 11170.14 | 255.35 | 0.67        |
|          | Sum         | 100.00 | 22806.54 |        |             |

# Chiral HPLC analysis: 4h

AK Prof. Enders - Analytiklabor 4.04

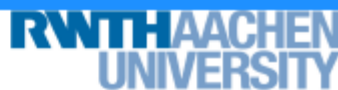

**Sample name:** Zou 310  
**Data file:** C:\SNOOPY\ZOU\310IC.D  
**Description:** Laufmittel: n-Heptan/EtOH 97:3;  
 Probe ist in LM/DCM gelöst.  
**Injection date:** 8/25/2014 4:36:20 PM  
**Acq. Analysis method:** CHIRALPAKIC1-6LNP.M  
**Column:** Chiralpak IC, (150 x 4,6) mm, 5µ, SN: IC00CD-QF015  
**Pressure at start:** 29 bar    **Start flow:** 0.700 ml/min    **Column oven:** 29.98 °C

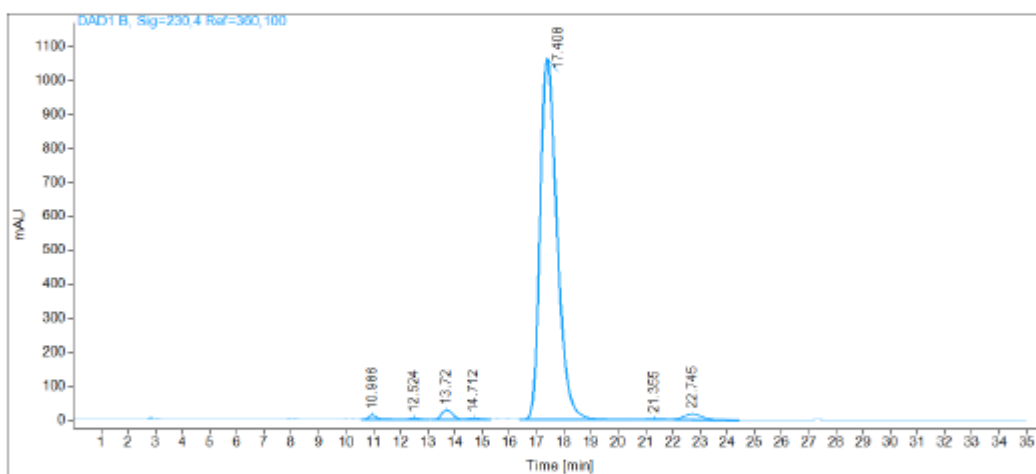

| Name    | RT [min] | Type | Area%  | Area     | Height  | Width [min] |
|---------|----------|------|--------|----------|---------|-------------|
| Zou 310 | 10.99    | VB   | 0.77   | 370.70   | 12.58   | 0.43        |
|         | 12.52    | BB   | 0.34   | 165.56   | 6.42    | 0.40        |
|         | 13.72    | BV   | 1.69   | 818.99   | 27.95   | 0.45        |
|         | 14.71    | VV   | 0.46   | 222.62   | 6.31    | 0.53        |
|         | 17.41    | BB   | 94.65  | 45762.80 | 1063.97 | 0.66        |
|         | 21.36    | BV   | 0.32   | 153.49   | 3.39    | 0.71        |
|         | 22.74    | VB   | 1.77   | 854.53   | 16.06   | 0.82        |
|         | Sum      |      | 100.00 | 48348.69 |         |             |

# <sup>1</sup>H NMR of 4i

e/Zou\_302

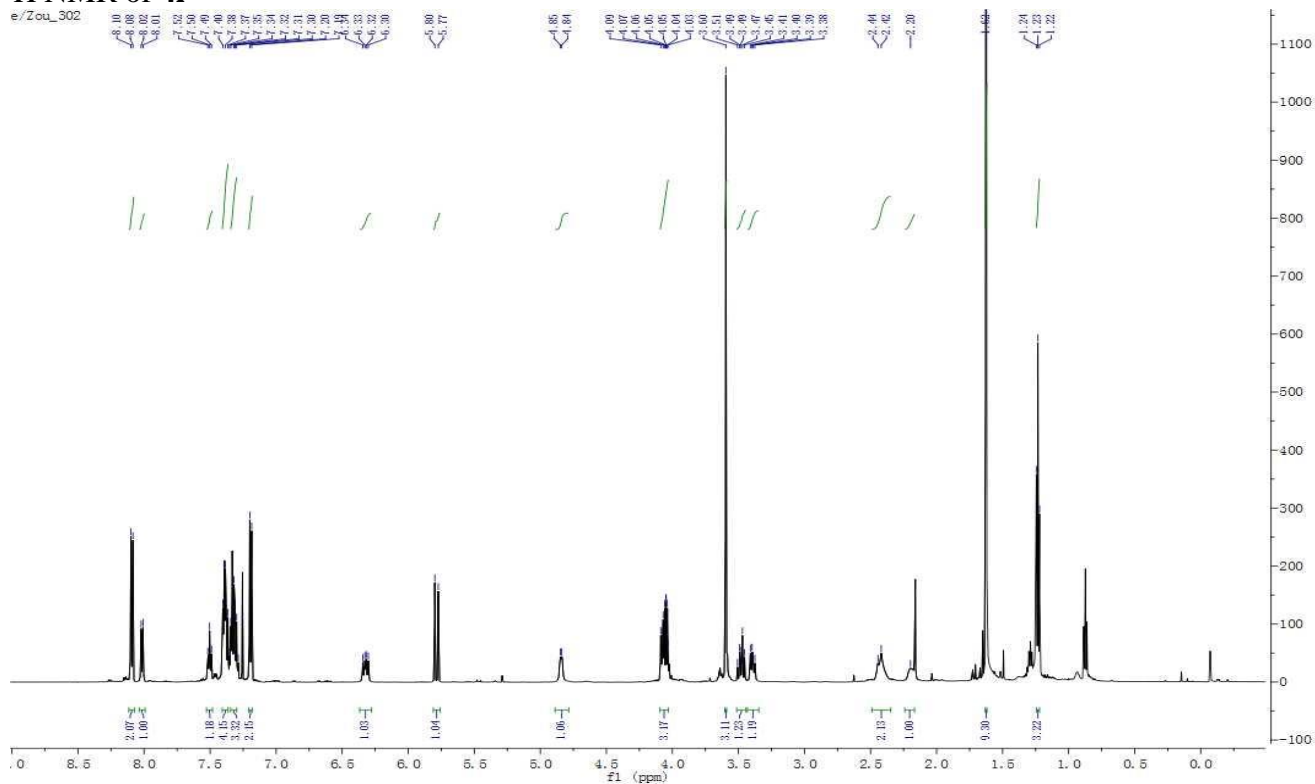

# <sup>13</sup>C NMR of 4i

CARBON\_01

e/zou\_302

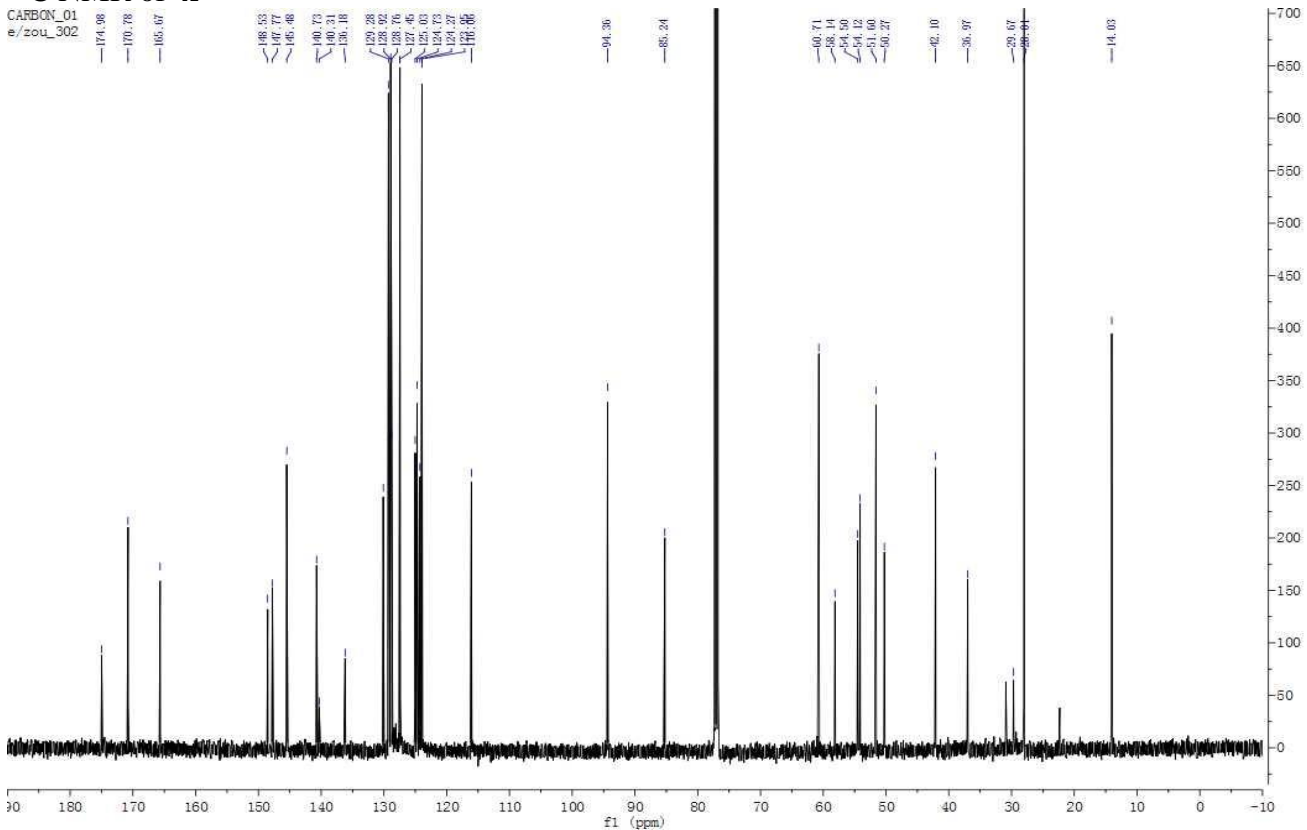

Chiral HPLC analysis: rac-4i

AK Prof. Enders - Analytiklabor 4.04

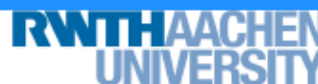

Sample name: Zou 345 rac  
 Data file: C:\SNOOPY\ZOU\ZOU 345 RAC NIA.D  
 Description: Laufmittel: n-Heptan/EtOH 7:3 Die Probe ist DCM/LM gelöst.

Injection date: 9/2/2014 2:05:42 PM  
 Acq. Analysis method: CHIRALPAKIARNP.M

Column: Chiralpak IA, (250 x 4,6) mm, 5µ, SN: IA00CE-RC036

Pressure at start: 42 bar Start flow: 0.700 ml/min Column oven: 29.98 °C

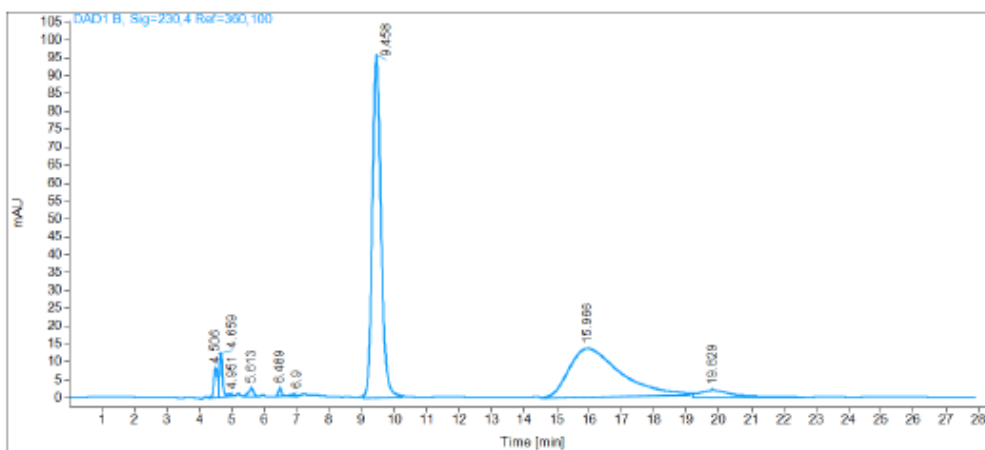

| Name     | Zou 345 rac |        |         |        |             |  |
|----------|-------------|--------|---------|--------|-------------|--|
| RT [min] | Type        | Area%  | Area    | Height | Width [min] |  |
| 4.51     | VV          | 1.83   | 66.16   | 8.35   | 0.12        |  |
| 4.66     | VV          | 2.16   | 78.10   | 12.48  | 0.09        |  |
| 4.95     | VB          | 0.19   | 6.85    | 0.68   | 0.14        |  |
| 5.81     | VV          | 0.65   | 23.62   | 2.15   | 0.16        |  |
| 6.49     | BB          | 0.43   | 15.50   | 2.25   | 0.11        |  |
| 6.90     | BV          | 0.20   | 7.14    | 0.49   | 0.20        |  |
| 9.46     | MM          | 48.88  | 1766.74 | 95.85  | 0.31        |  |
| 15.97    | MM          | 41.28  | 1491.92 | 13.53  | 1.84        |  |
| 19.83    | VB          | 4.38   | 158.24  | 1.98   | 1.08        |  |
|          | Sum         | 100.00 | 3614.26 |        |             |  |

AK Prof. Enders - Analytiklabor 4.04

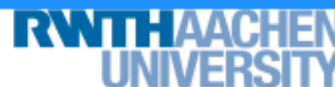

**Sample name:** Zou 302  
**Data file:** C:\SNOOPY\ZOU\ZOU 302 IA.D  
**Description:** Laufmittel: n-Heptan/EtOH 7:3 Die Probe ist DCMLM gelöst.  
**Injection date:** 9/2/2014 1:35:13 PM  
**Acq. Analysis method:** CHIRALPAKIARNP.M  
**Column:** Chiralpak IA, (250 x 4,6) mm, 5µ, SN: IA00CE-RC036

**Pressure at start:** 42 bar      **Start flow:** 0.700 ml/min      **Column oven:** 29.99 °C

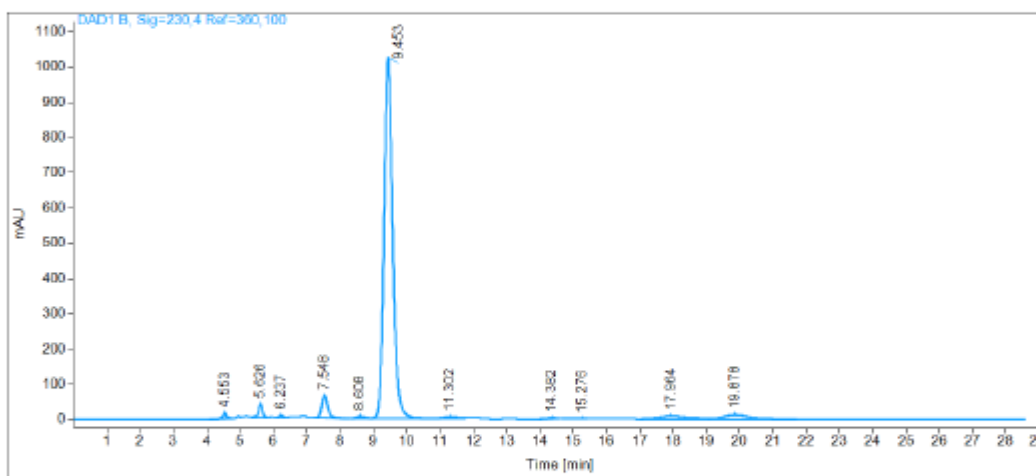

| Name     | Zou 302 |        |          |         |             |  |
|----------|---------|--------|----------|---------|-------------|--|
| RT [min] | Type    | Area%  | Area     | Height  | Width [min] |  |
| 4.55     | BB      | 0.66   | 143.43   | 17.66   | 0.12        |  |
| 5.63     | VV      | 1.55   | 337.05   | 37.96   | 0.13        |  |
| 6.24     | BB      | 0.31   | 66.37    | 7.85    | 0.13        |  |
| 7.55     | BB      | 3.78   | 820.58   | 65.35   | 0.19        |  |
| 8.61     | BV      | 0.49   | 106.52   | 6.11    | 0.26        |  |
| 9.45     | VV      | 86.81  | 18841.98 | 1023.63 | 0.28        |  |
| 11.30    | VV      | 0.98   | 211.93   | 5.65    | 0.59        |  |
| 14.38    | MM      | 0.17   | 37.12    | 2.44    | 0.25        |  |
| 15.28    | MM      | 0.04   | 9.55     | 0.27    | 0.45        |  |
| 17.96    | BV      | 2.29   | 497.00   | 8.62    | 0.88        |  |
| 19.88    | VB      | 2.92   | 632.95   | 12.48   | 0.78        |  |
|          | Sum     | 100.00 | 21704.48 |         |             |  |

# <sup>1</sup>H NMR of 4j

e/zou\_283

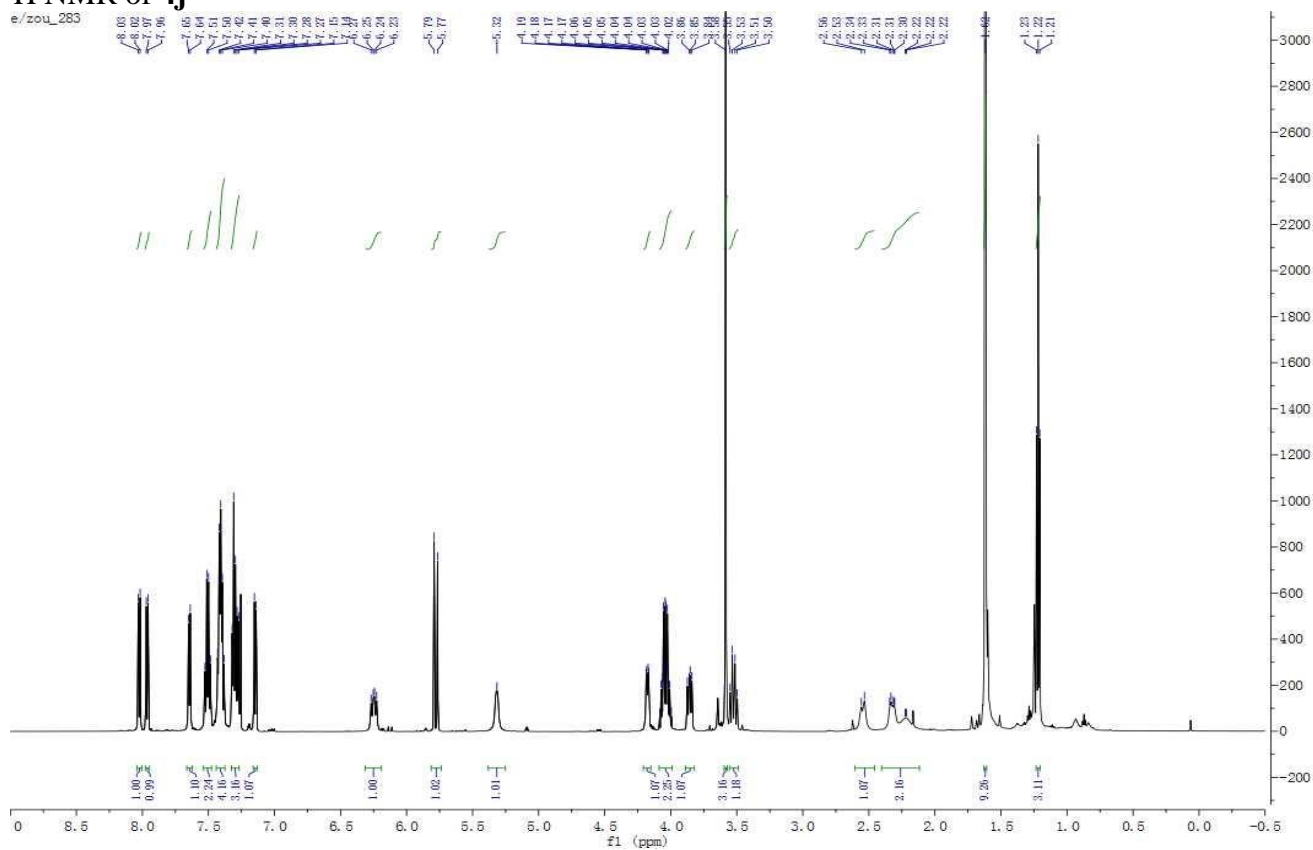

# <sup>13</sup>C NMR of 4j

e/zou\_283

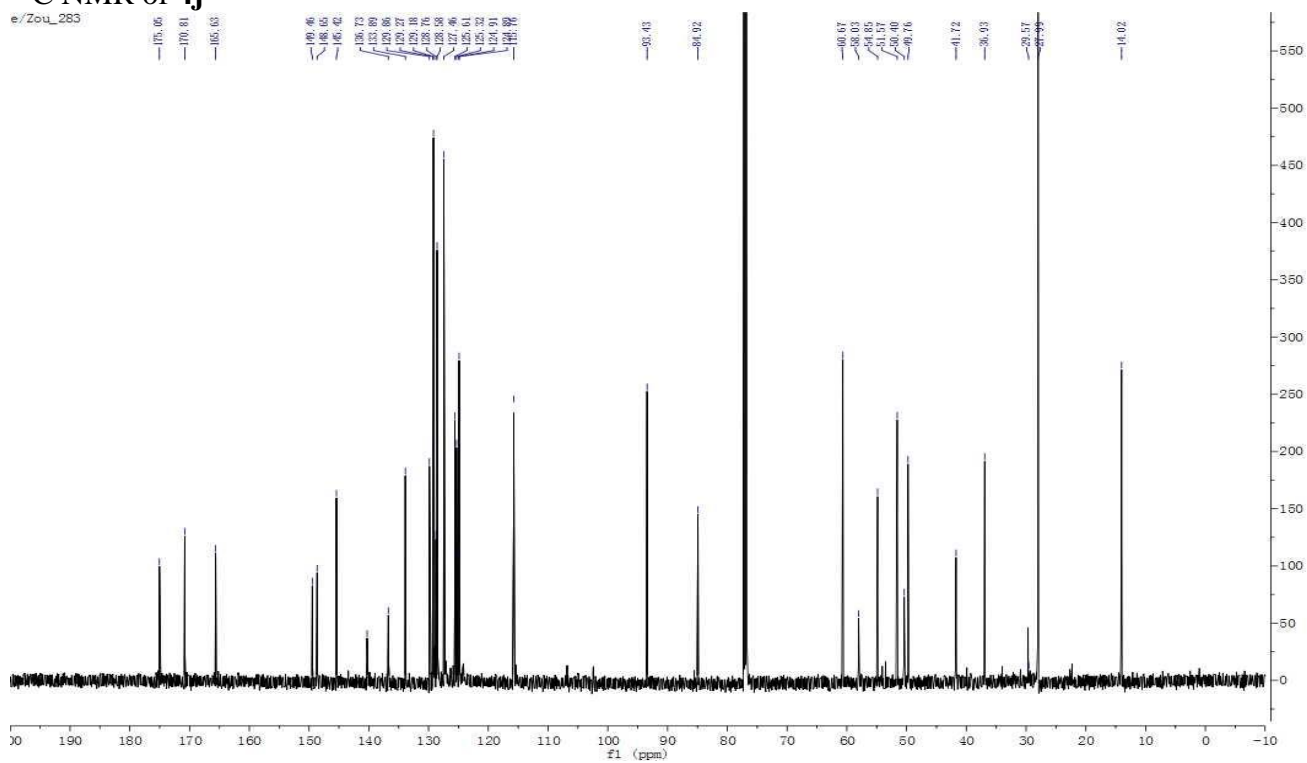



Chiral HPLC analysis: rac-4j

AK Prof. Enders - Analytiklabor 4.04

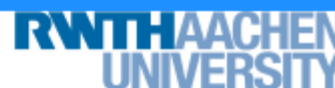

Sample name: Zou 259 rac  
 Data file: C:\SNOOPY\ZOU\ZOU 259 RAC 3IA.D  
 Description: Laufmittel: n-Heptan/EtOH 9:1 Die Probe ist DCM/LM gelöst.

Injection date: 6/23/2014 3:28:50 PM  
 Acq. Analysis method: CHIRALPAKIARNP.M

Column: Chiralpak IA, (250 x 4,6) mm, 5µ, SN: IA00CE-RC036

Pressure at start: 47 bar Start flow: 1.000 ml/min Column oven: 29.98 °C

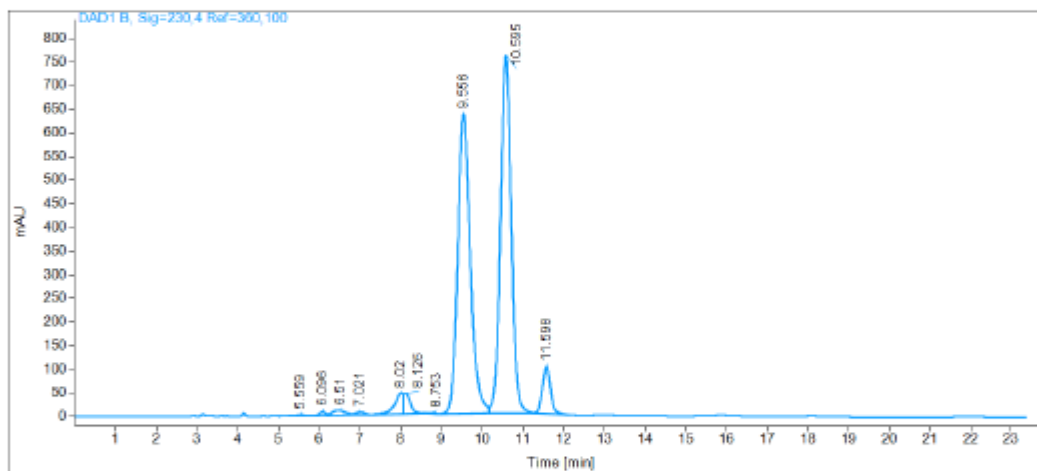

| Name        | RT [min] | Type | Area%  | Area     | Height | Width [min] |
|-------------|----------|------|--------|----------|--------|-------------|
| Zou 259 rac | 5.56     | VB   | 0.13   | 39.77    | 2.81   | 0.20        |
|             | 6.10     | BV   | 0.26   | 78.15    | 7.88   | 0.15        |
|             | 6.51     | VV   | 0.75   | 228.39   | 10.48  | 0.29        |
|             | 7.02     | VB   | 0.30   | 91.68    | 6.19   | 0.22        |
|             | 8.02     | BV   | 1.98   | 602.73   | 43.35  | 0.20        |
|             | 8.13     | VB   | 1.69   | 513.65   | 43.30  | 0.18        |
|             | 8.75     | BB   | 0.04   | 11.32    | 1.20   | 0.15        |
|             | 9.56     | BV   | 45.07  | 13731.75 | 633.11 | 0.33        |
|             | 10.59    | VB   | 45.25  | 13787.54 | 756.58 | 0.28        |
|             | 11.60    | BB   | 4.55   | 1384.87  | 99.54  | 0.21        |
|             | Sum      |      | 100.00 | 30469.85 |        |             |

Chiral HPLC analysis: 4j

AK Prof. Enders - Analytiklabor 4.04

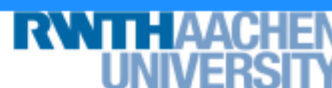

**Sample name:** Zou 283  
**Data file:** C:\SNOOPY\ZOU\ZOU 283 I.A.D  
**Description:** Laufmittel: n-Heptan/EtOH 9:1 Die Probe ist DCM/LM gelöst.  
**Injection date:** 7/1/2014 2:36:11 PM  
**Acq. Analysis method:** CHIRALPAKIARNP.M  
**Column:** Chiralpak IA, (250 x 4,6) mm, 5µ, SN: IA00CE-RC036

**Pressure at start:** 46 bar      **Start flow:** 1.000 ml/min      **Column oven:** 29.98 °C

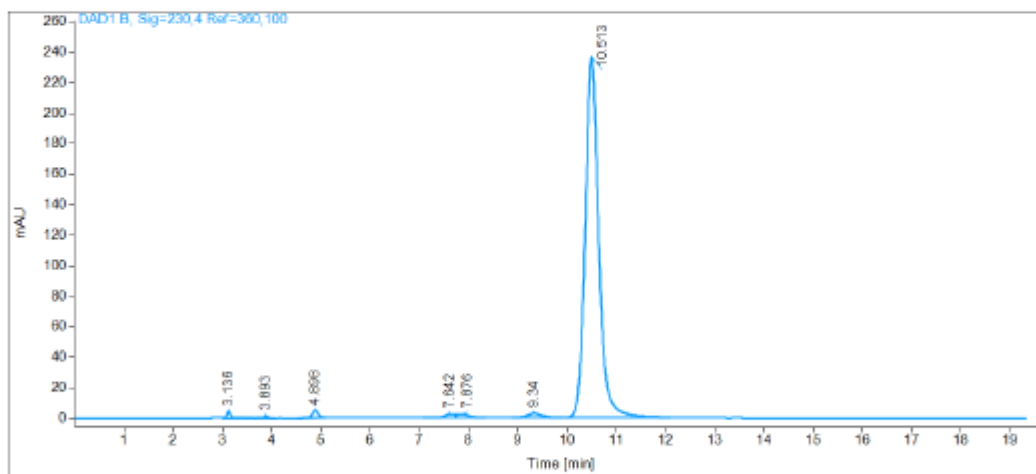

| Name     | Zou 283 |        |         |        |             |  |
|----------|---------|--------|---------|--------|-------------|--|
| RT [min] | Type    | Area%  | Area    | Height | Width [min] |  |
| 3.14     | VV      | 0.51   | 24.42   | 4.15   | 0.09        |  |
| 3.89     | VV      | 0.17   | 7.96    | 1.24   | 0.09        |  |
| 4.90     | BB      | 0.86   | 40.92   | 4.81   | 0.13        |  |
| 7.64     | BV      | 0.78   | 37.06   | 2.57   | 0.21        |  |
| 7.88     | VV      | 0.89   | 42.28   | 2.52   | 0.25        |  |
| 8.34     | BB      | 1.28   | 61.09   | 2.77   | 0.34        |  |
| 10.51    | BB      | 95.52  | 4555.23 | 236.59 | 0.29        |  |
| Sum      |         | 100.00 | 4768.97 |        |             |  |

# <sup>1</sup>H NMR of 4k

e/Zou\_zou328

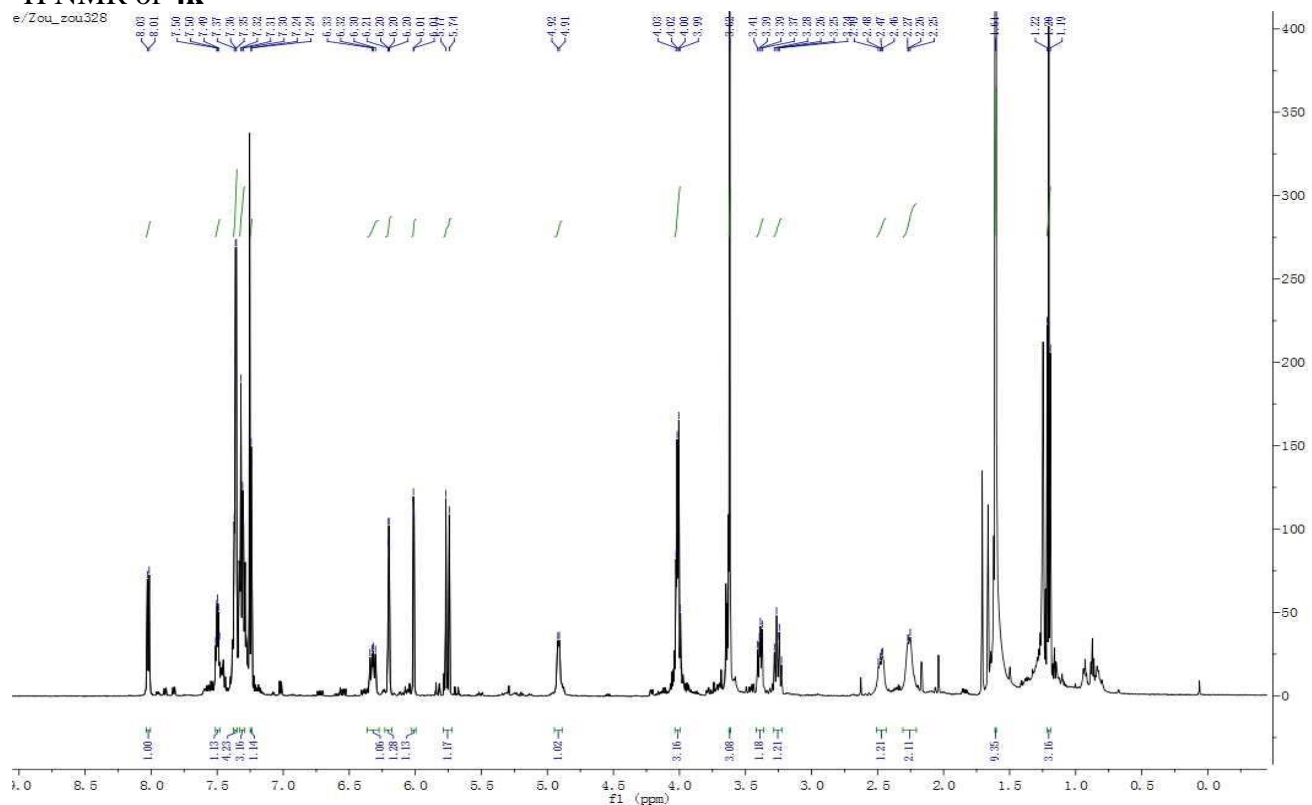

# <sup>13</sup>C NMR of 4k

e/Zou\_zou328

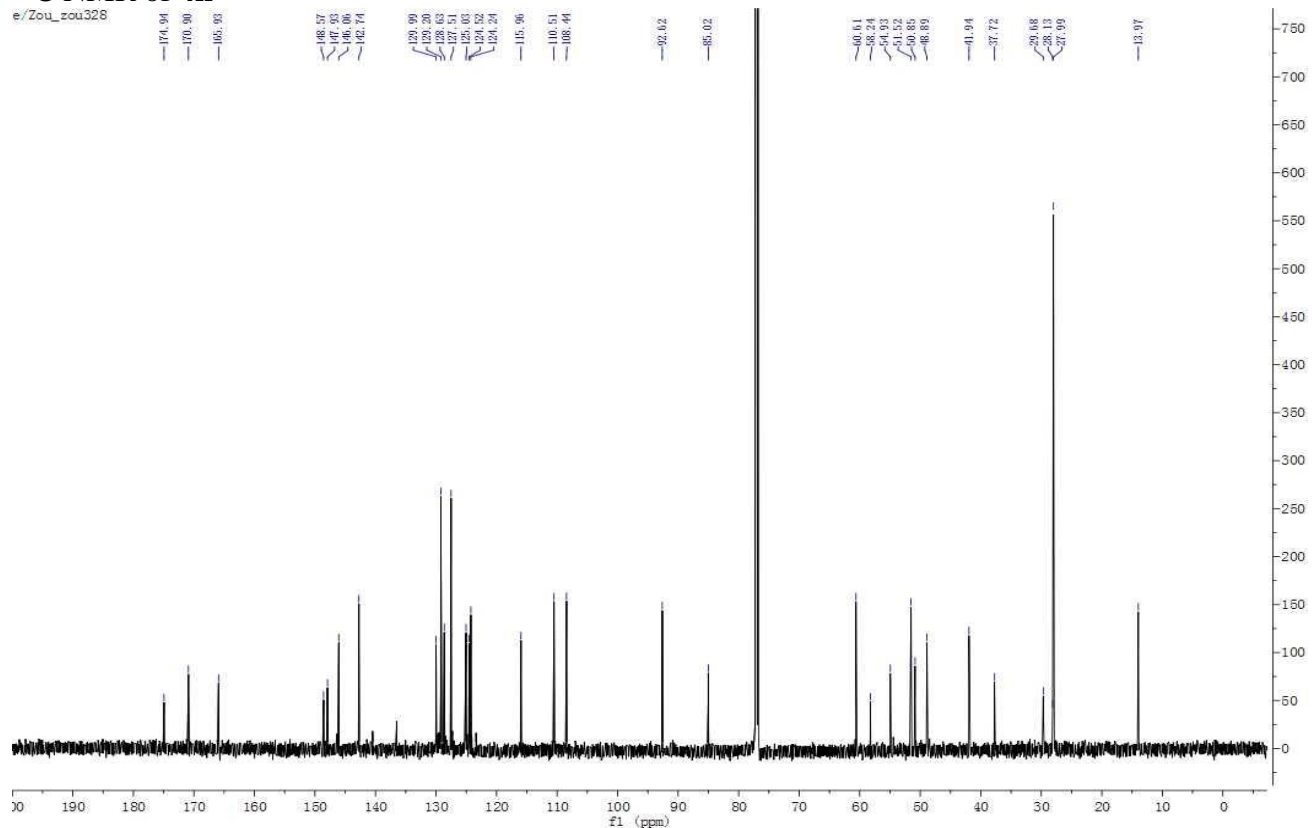

Chiral HPLC analysis: rac-4k (note: An eluent n-Heptane/isopropanol = 9:1)

AK Prof. Enders - Analytiklabor 4.04

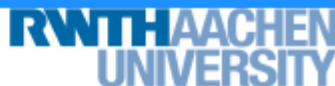

Sample name: Zou 309 rac  
 Data file: C:\SNOOPY\ZOU\309RNIC.D  
 Description: Laufmittel: n-Heptan/EtOH 97:3;  
 Probe ist in LM/DCM gelöst.  
 Injection date: 8/15/2014 9:18:36 AM  
 Acq. Analysis method: CHIRALPAKIC1-8LNP.M

Column: Chiralpak IC, (150 x 4,6) mm, 5µ, SN: IC00CD-QF015

Pressure at start: 29 bar      Start flow: 0.700 ml/min      Column oven: 30.01 °C

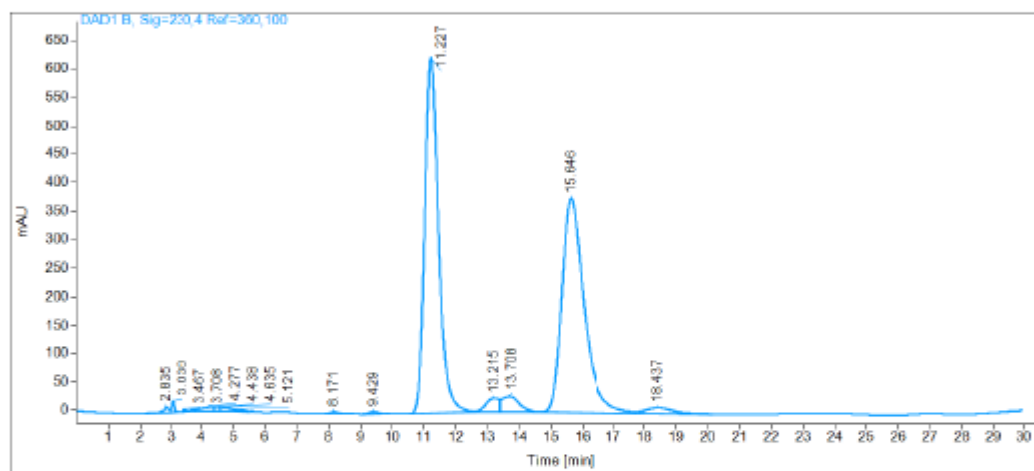

| Name | Zou 309 rac |      | Area%  | Area     | Height | Width [min] |
|------|-------------|------|--------|----------|--------|-------------|
|      | RT [min]    | Type |        |          |        |             |
|      | 2.84        | BV   | 0.26   | 107.11   | 10.14  | 0.15        |
|      | 3.04        | VB   | 0.26   | 106.82   | 20.30  | 0.08        |
|      | 3.47        | BB   | 0.05   | 21.65    | 4.22   | 0.08        |
|      | 3.71        | BV   | 0.05   | 20.40    | 3.05   | 0.10        |
|      | 4.28        | VV   | 0.53   | 215.09   | 9.89   | 0.28        |
|      | 4.44        | VV   | 0.21   | 84.20    | 8.03   | 0.14        |
|      | 4.64        | VV   | 0.41   | 164.40   | 7.14   | 0.35        |
|      | 5.12        | VB   | 0.17   | 68.85    | 4.15   | 0.26        |
|      | 8.17        | VB   | 0.20   | 79.19    | 3.39   | 0.33        |
|      | 9.43        | BV   | 0.21   | 86.29    | 3.80   | 0.36        |
|      | 11.23       | BB   | 46.25  | 18772.53 | 624.27 | 0.46        |
|      | 13.22       | BV   | 1.65   | 668.92   | 23.73  | 0.44        |
|      | 13.71       | VB   | 2.58   | 1048.67  | 27.58  | 0.56        |
|      | 15.65       | BV   | 45.68  | 18539.09 | 375.47 | 0.75        |
|      | 18.44       | VB   | 1.49   | 604.22   | 10.04  | 0.90        |
|      | Sum         |      | 100.00 | 40587.22 |        |             |

Chiral HPLC analysis: **4k** (note: An eluent n-Heptane/isopropanol = 9:1 was used)

AK Prof. Enders - Analytiklabor 4.04

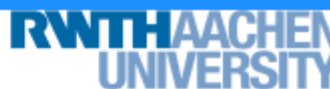

Sample name: Zou 328

Data file: C:\SNOOPY\ZOU\328IC.D

Description: Laufmittel: n-Heptan/EtOH 97:3;  
Probe ist in LM/DCM gelöst.

Injection date: 8/15/2014 8:47:30 AM

Acq. Analysis method: CHIRALPAKIC1-8LNP.M

Column: Chiralpak IC, (150 x 4,6) mm, 5µ, SN: IC00CD-QF015

Pressure at start: 29 bar

Start flow: 0.700 ml/min

Column oven: 30 °C

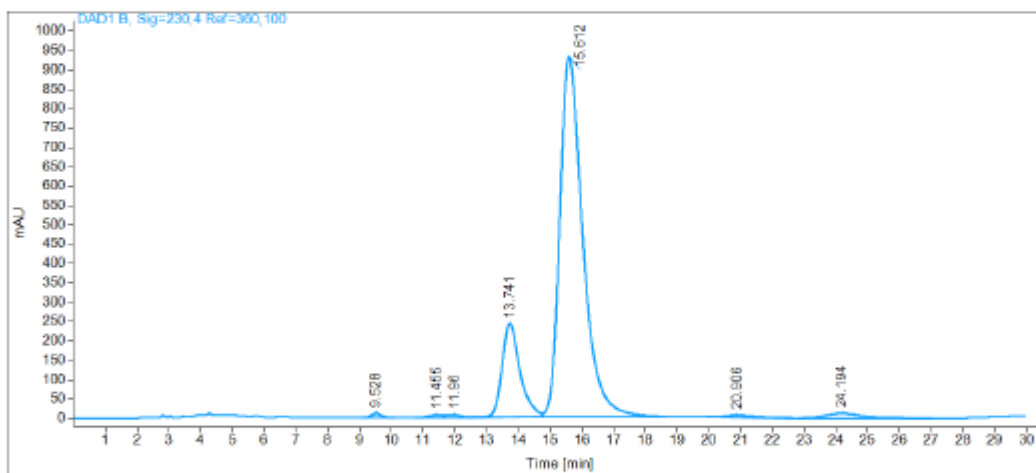

| Name     | Zou 328 |        |          |        |             |  |
|----------|---------|--------|----------|--------|-------------|--|
| RT [min] | Type    | Area%  | Area     | Height | Width [min] |  |
| 9.53     | BB      | 0.43   | 253.58   | 11.48  | 0.34        |  |
| 11.46    | BV      | 0.33   | 194.36   | 6.07   | 0.50        |  |
| 11.96    | VB      | 0.35   | 202.57   | 6.69   | 0.46        |  |
| 13.74    | BV      | 16.34  | 9552.84  | 241.64 | 0.60        |  |
| 15.61    | VB      | 80.16  | 46663.13 | 930.84 | 0.76        |  |
| 20.91    | BB      | 0.65   | 381.84   | 6.01   | 0.94        |  |
| 24.19    | BB      | 1.73   | 1011.19  | 12.18  | 1.21        |  |
|          | Sum     | 100.00 | 58459.50 |        |             |  |

# <sup>1</sup>H NMR of 4I

e/Zou\_308-2

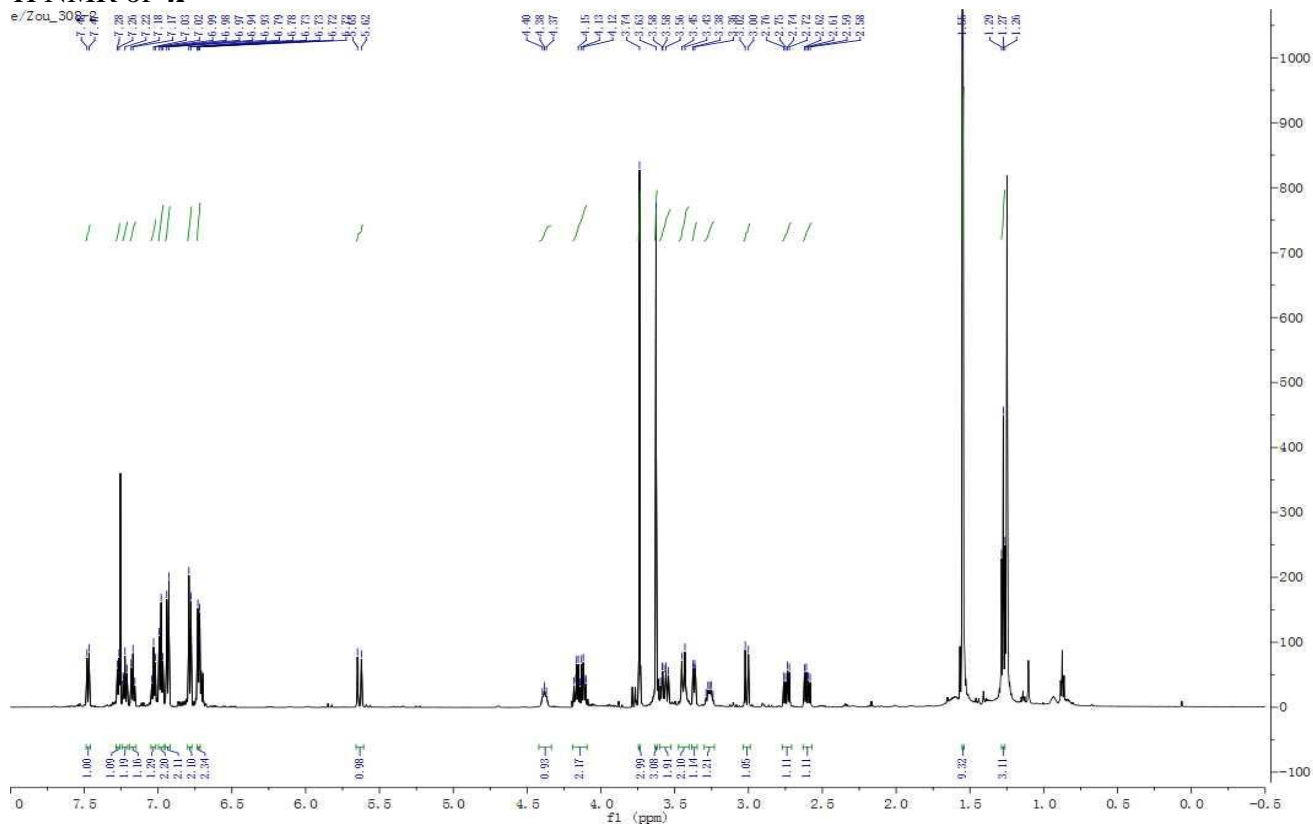

# <sup>13</sup>C NMR of 4I

e/Zou\_308-2

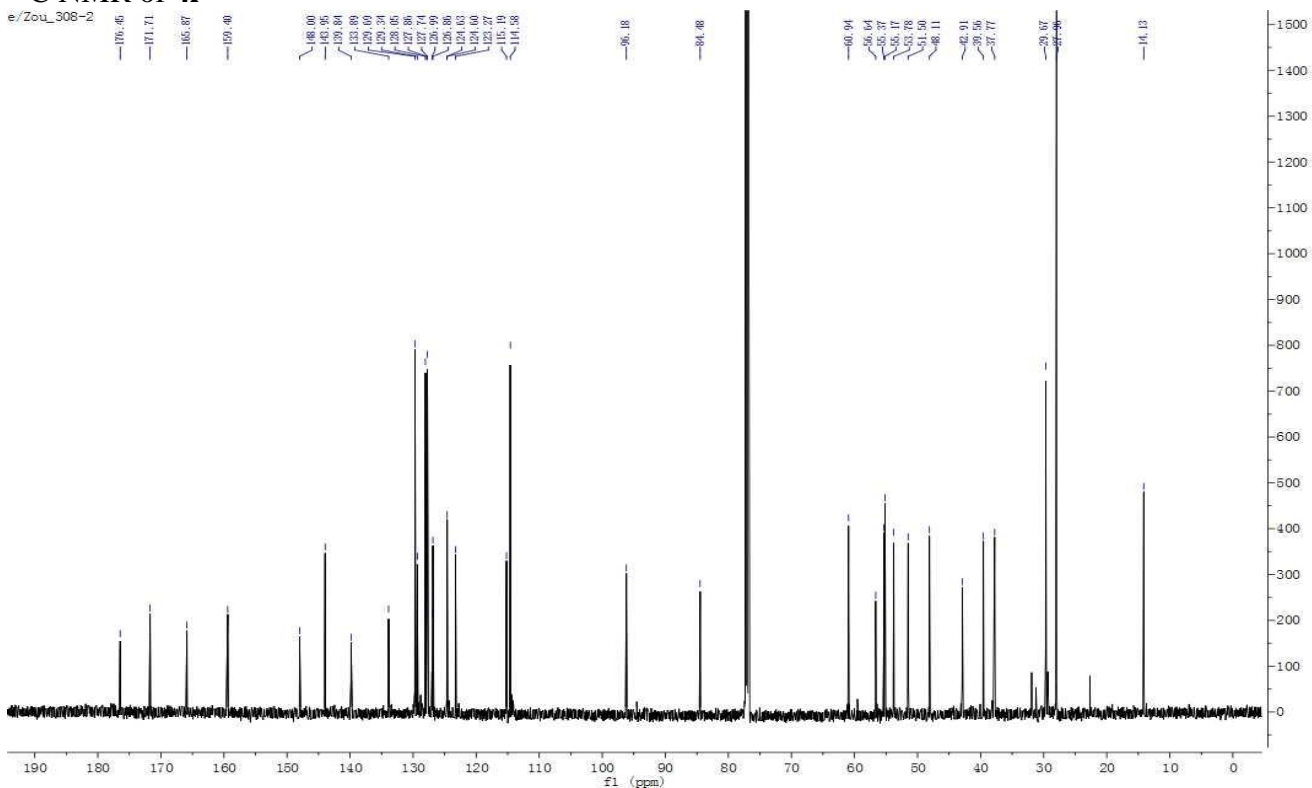

# Chiral HPLC analysis: rac-41

AK Prof. Enders - Analytiklabor 4.04

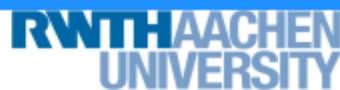

Sample name: Zou 342  
 Data file: C:\SNOOPY\ZOU\ZOU 342 I.A.D  
 Description: Laufmittel: n-Heptan/IP 9:1 Die Probe ist DCM/LM gelöst.

Injection date: 8/29/2014 8:29:29 AM  
 Acq. Analysis method: CHIRALPAKIARNP.M

Column: Chiralpak IA, (250 x 4,6) mm, 5µ, SN: IA00CE-RC038

Pressure at start: 50 bar Start flow: 1.000 ml/min Column oven: 30 °C

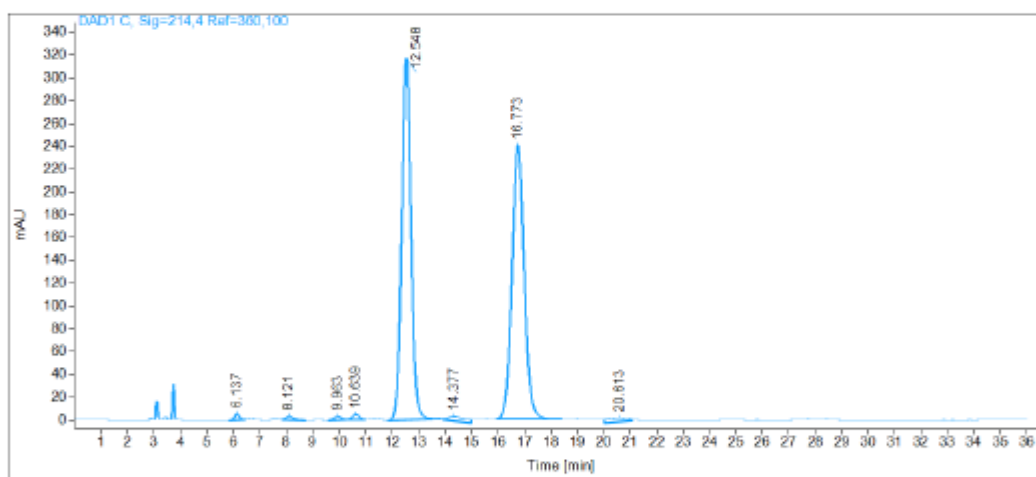

| Name     | Zou 342 |        |          |        |             |  |
|----------|---------|--------|----------|--------|-------------|--|
| RT [min] | Type    | Area%  | Area     | Height | Width [min] |  |
| 6.14     | BB      | 0.41   | 66.87    | 5.39   | 0.19        |  |
| 8.12     | BB      | 0.39   | 63.05    | 3.12   | 0.30        |  |
| 9.96     | BB      | 0.37   | 59.31    | 3.28   | 0.29        |  |
| 10.64    | BB      | 0.49   | 78.90    | 4.34   | 0.29        |  |
| 12.55    | BB      | 48.35  | 7817.13  | 316.67 | 0.38        |  |
| 14.38    | MM      | 1.06   | 172.15   | 3.87   | 0.74        |  |
| 16.77    | BB      | 47.83  | 7732.28  | 239.76 | 0.50        |  |
| 20.61    | MM      | 1.09   | 176.95   | 3.39   | 0.65        |  |
|          | Sum     | 100.00 | 16166.64 |        |             |  |

Chiral HPLC analysis: **41** (note: An eluent n-Heptane/isopropanol = 9:1 was used)

AK Prof. Enders - Analytiklabor 4.04

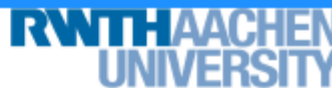

Sample name: Zou 354  
 Data file: C:\SNOOPY\ZOU\354\A.D  
 Description: Laufmittel: n-Heptan/IP 95:5;  
 Probe ist in LM/DCM gelöst.  
 Injection date: 9/4/2014 11:49:04 AM  
 Acq. Analysis method: CHIRALPAKIARNP.M

Column: Chiralpak IA, (250 x 4,6) mm, 5µ, SN: IA00CE-RC036

Pressure at start: 50 bar      Start flow: 1.000 ml/min      Column oven: 29.99 °C

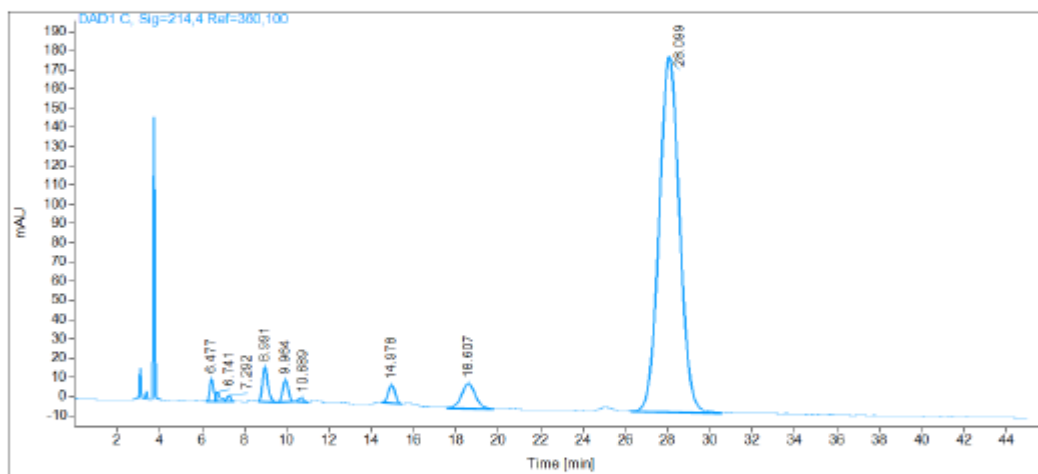

| Name | RT [min] | Type | Area%  | Area     | Height | Width [min] |
|------|----------|------|--------|----------|--------|-------------|
|      | 6.48     | BV   | 1.06   | 148.41   | 11.40  | 0.20        |
|      | 6.74     | VV   | 0.53   | 73.70    | 4.89   | 0.21        |
|      | 7.29     | VB   | 0.26   | 36.67    | 2.91   | 0.19        |
|      | 8.99     | BB   | 2.28   | 319.16   | 17.92  | 0.27        |
|      | 9.96     | BB   | 1.50   | 210.38   | 11.36  | 0.29        |
|      | 10.69    | BB   | 0.27   | 37.24    | 2.22   | 0.27        |
|      | 14.98    | BB   | 1.60   | 223.62   | 9.64   | 0.37        |
|      | 18.61    | BB   | 4.24   | 593.15   | 12.87  | 0.74        |
|      | 28.10    | BB   | 88.26  | 12351.44 | 185.05 | 1.04        |
|      | Sum      |      | 100.00 | 13993.76 |        |             |



# <sup>1</sup>H NMR of 4m

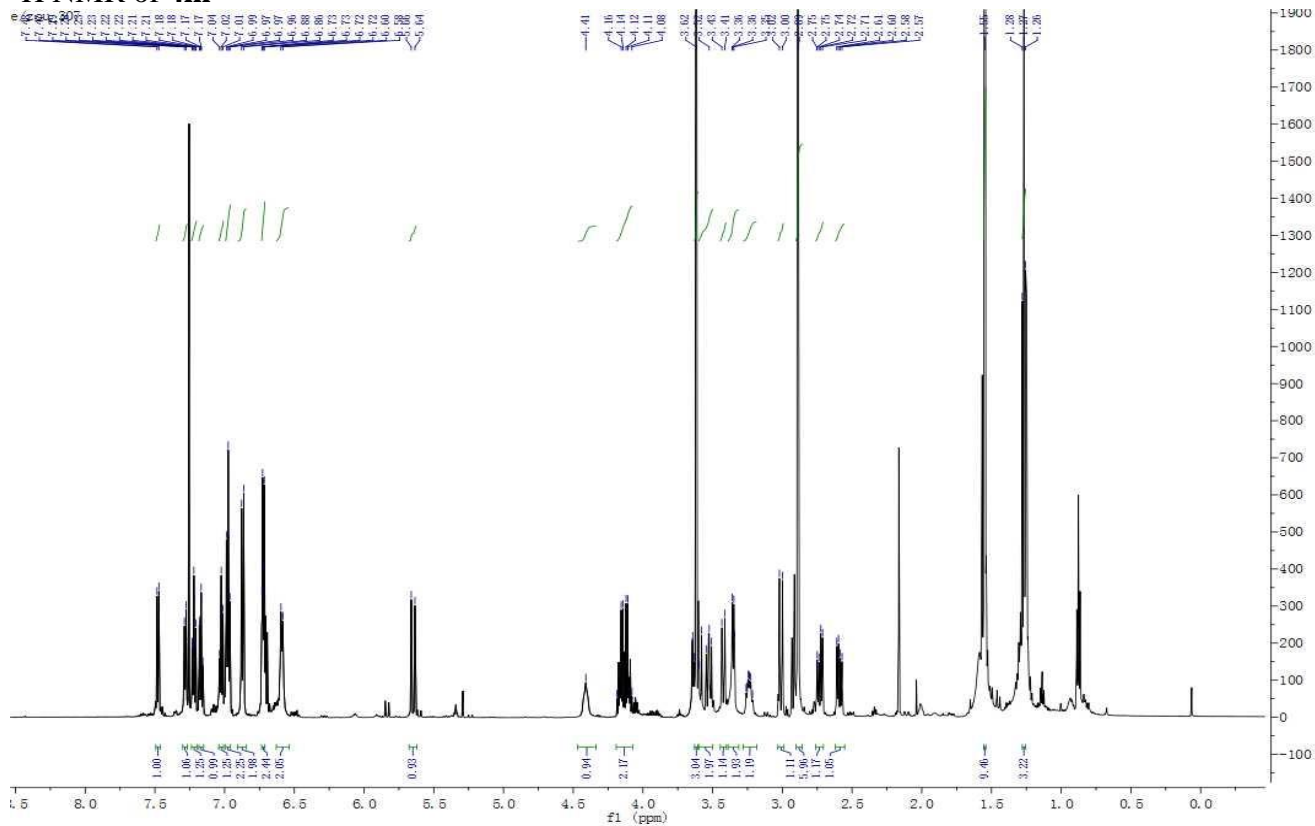

# <sup>13</sup>C NMR of 4m

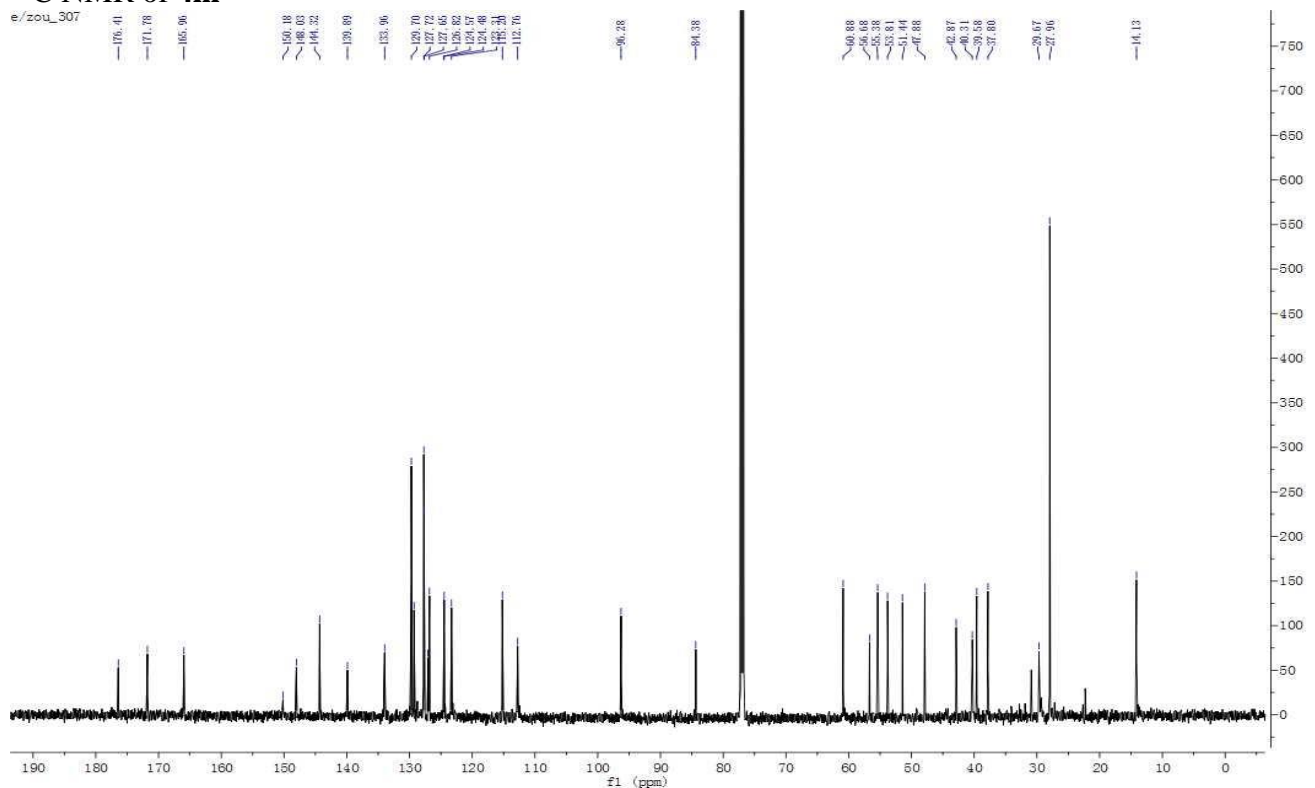

# Chiral HPLC analysis: rac-4m

AK Prof. Enders - Analytiklabor 4.04

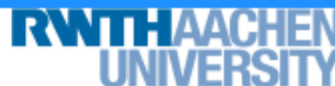

**Sample name:** Zou 343  
**Data file:** C:\SNOOPY\ZOU\343IA.D  
**Description:** Laufmittel: n-Heptan/IP 95:5;  
 Probe ist in LM/DCM gelöst.  
**Injection date:** 8/28/2014 4:26:56 PM  
**Acq. Analysis method:** CHIRALPAKIARNP.M

**Column:** Chiralpak IA, (250 x 4,6) mm, 5µ, SN: IA00CE-RC036

**Pressure at start:** 33 bar      **Start flow:** 0.700 ml/min      **Column oven:** 30 °C

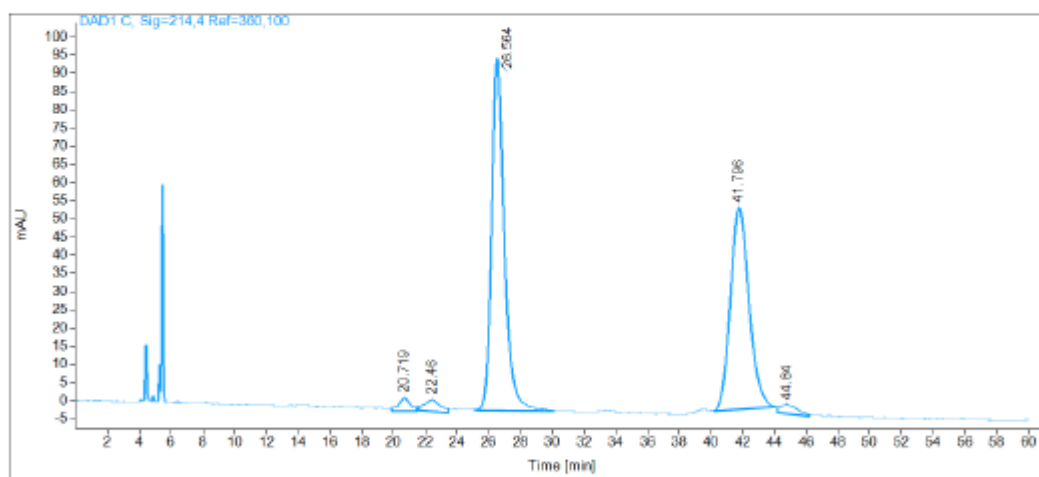

| Name     | Zou 343 |        |          |        |             |  |
|----------|---------|--------|----------|--------|-------------|--|
| RT [min] | Type    | Area%  | Area     | Height | Width [min] |  |
| 20.72    | MM      | 1.78   | 185.17   | 3.60   | 0.86        |  |
| 22.46    | MM      | 2.01   | 209.32   | 3.14   | 1.11        |  |
| 26.56    | BB      | 51.26  | 5344.58  | 96.64  | 0.83        |  |
| 41.80    | BB      | 43.20  | 4504.24  | 55.45  | 1.23        |  |
| 44.84    | MM      | 1.75   | 182.90   | 2.30   | 1.32        |  |
|          | Sum     | 100.00 | 10426.21 |        |             |  |

# Chiral HPLC analysis: 4m

AK Prof. Enders - Analytiklabor 4.04

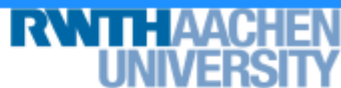

**Sample name:** Zou 307  
**Data file:** C:\SNOOPY\ZOU\307IA.D  
**Description:** Laufmittel: n-Heptan/IP 95:5;  
 Probe ist in LM/DCM gelöst.  
**Injection date:** 8/21/2014 3:30:09 PM  
**Acq. Analysis method:** CHIRALPAKIARNP.M

**Column:** Chiralpak IA, (250 x 4,6) mm, 5µ, SN: IA00CE-RC038

**Pressure at start:** 32 bar      **Start flow:** 0.700 ml/min      **Column oven:** 29.97 °C

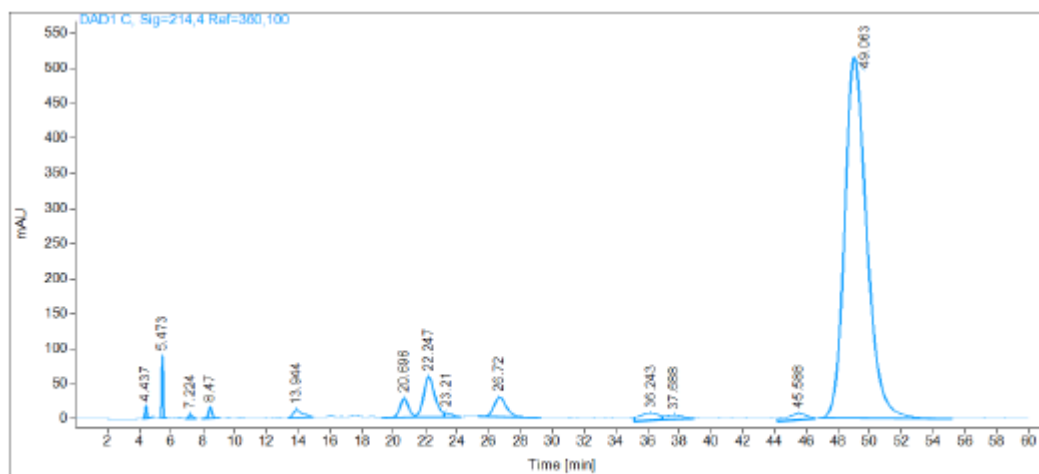

| Name     | Zou 307 |        |          |        |             |  |
|----------|---------|--------|----------|--------|-------------|--|
| RT [min] | Type    | Area%  | Area     | Height | Width [min] |  |
| 4.44     | BB      | 0.19   | 113.93   | 16.14  | 0.11        |  |
| 5.47     | BB      | 0.04   | 556.80   | 87.75  | 0.10        |  |
| 7.22     | BB      | 0.15   | 85.90    | 5.71   | 0.21        |  |
| 8.47     | BB      | 0.45   | 263.24   | 15.88  | 0.25        |  |
| 13.94    | BB      | 0.74   | 437.93   | 11.11  | 0.58        |  |
| 20.70    | BV      | 1.75   | 1028.86  | 27.21  | 0.57        |  |
| 22.25    | MF      | 4.76   | 2807.74  | 56.74  | 0.82        |  |
| 23.21    | FM      | 0.29   | 170.09   | 5.52   | 0.51        |  |
| 26.72    | BB      | 2.58   | 1519.25  | 28.02  | 0.82        |  |
| 36.24    | MF      | 1.47   | 865.78   | 10.19  | 1.42        |  |
| 37.89    | FM      | 0.86   | 508.48   | 6.40   | 1.32        |  |
| 45.59    | MM      | 1.25   | 736.10   | 8.35   | 1.47        |  |
| 49.06    | BB      | 84.57  | 49641.05 | 514.68 | 1.48        |  |
| Sum      |         | 100.00 | 58934.96 |        |             |  |

# <sup>1</sup>H NMR of 6

e/Zou\_311-2

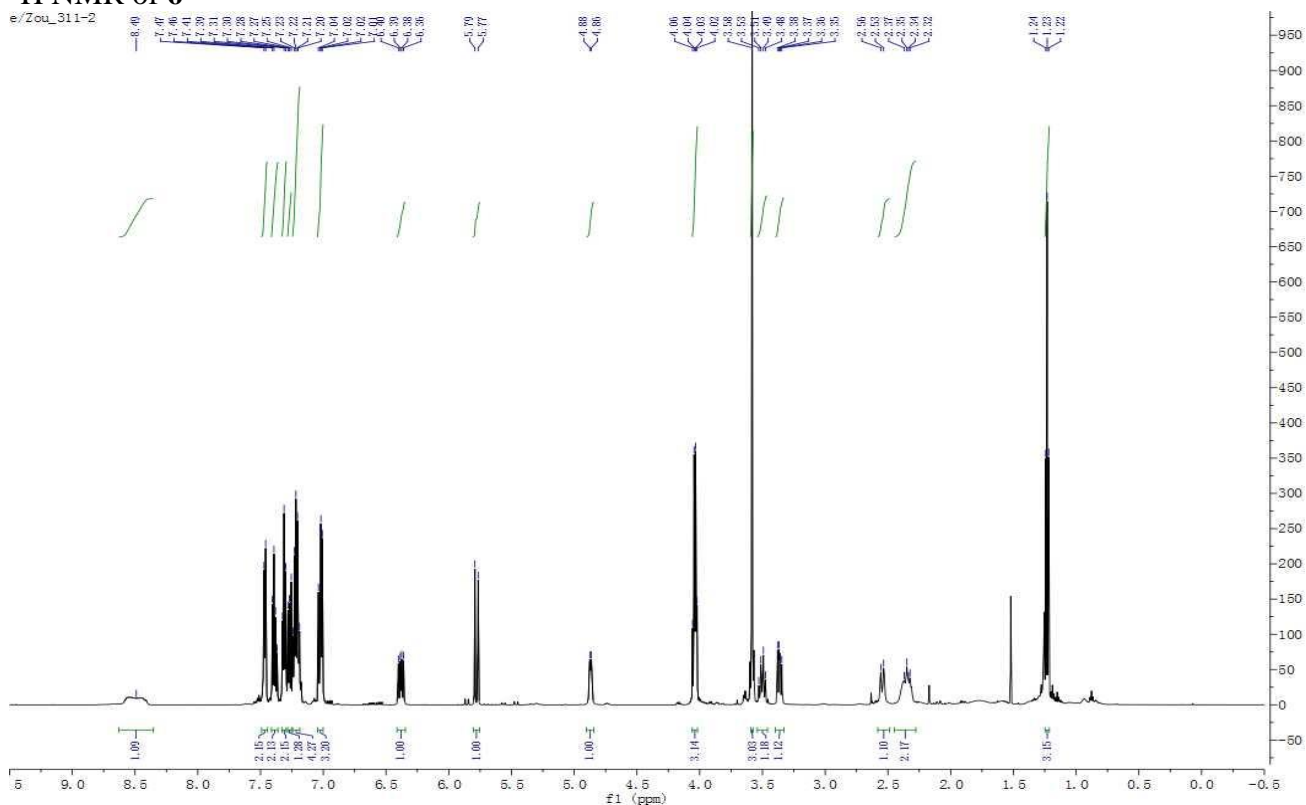

# <sup>13</sup>C NMR of 6

e/Zou\_311-2

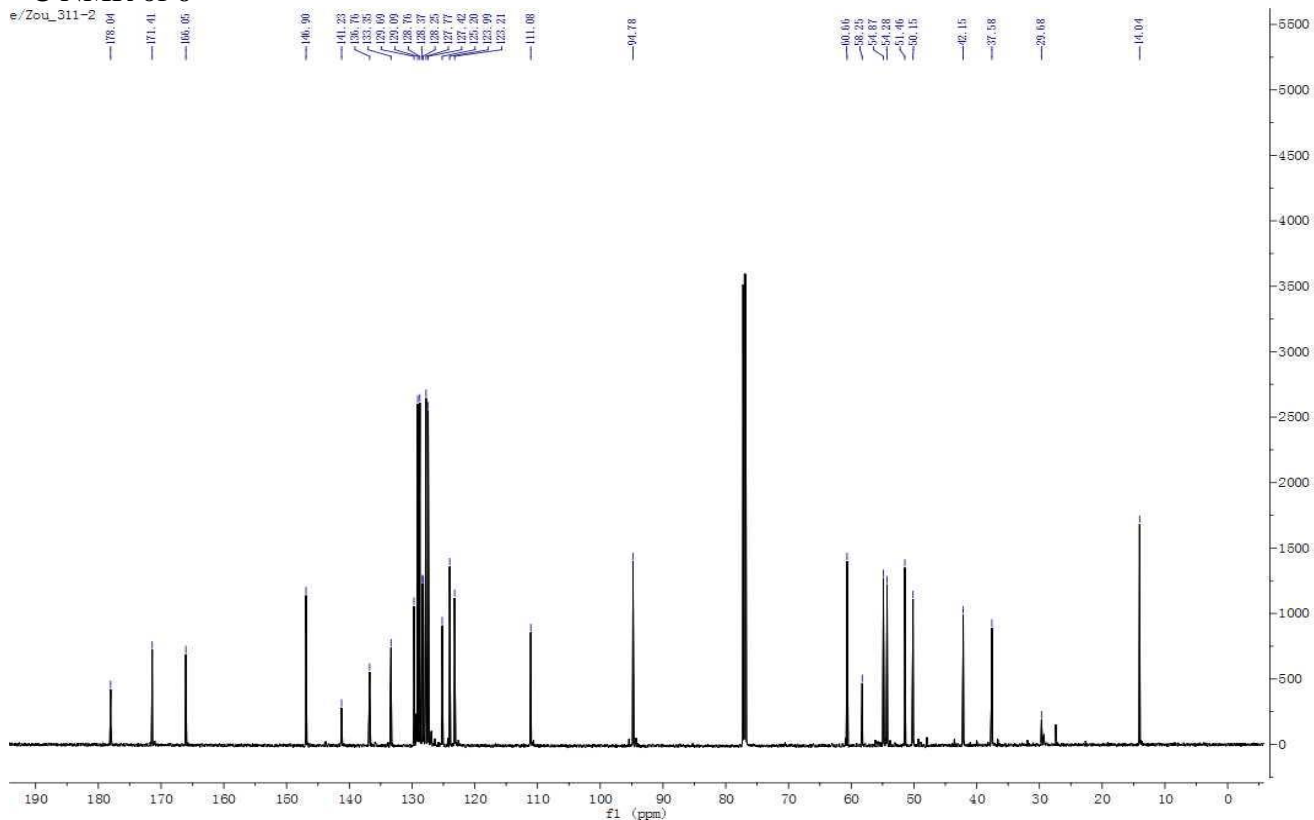

# Chiral HPLC analysis: rac-6

AK Prof. Enders - Analytiklabor 4.04

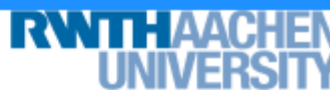

Sample name: Zou 293 rac

Data file: C:\SNOOPY\ZOU\293R2\IC.D

Description: Laufmittel: n-Heptan/EtOH 9:1;  
Probe ist in LM/DCM gelöst

Injection date: 9/24/2014 3:54:22 PM

Acq. Analysis method: CHIRALPAKIC1-6LNP.M

Column: Chiralpak IC, (150 x 4,6) mm, 5µ, SN: IC00CD-QF015

Pressure at start: 24 bar      Start flow: 0.700 ml/min      Column oven: 30 °C

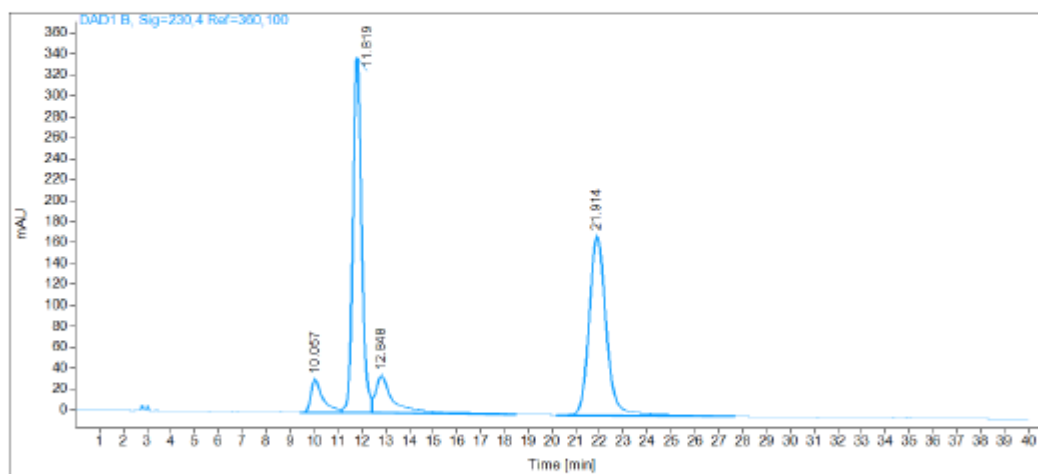

| Name     | Zou 293 rac |        |          |        |             |
|----------|-------------|--------|----------|--------|-------------|
| RT [min] | Type        | Area%  | Area     | Height | Width [min] |
| 10.06    | BV          | 5.53   | 1120.57  | 31.44  | 0.51        |
| 11.82    | VV          | 42.80  | 8670.87  | 339.38 | 0.39        |
| 12.85    | VB          | 9.44   | 1912.01  | 35.35  | 0.74        |
| 21.91    | BB          | 42.23  | 8554.98  | 170.39 | 0.77        |
|          | Sum         | 100.00 | 20258.43 |        |             |

# Chiral HPLC analysis: 6

AK Prof. Enders - Analytiklabor 4.04

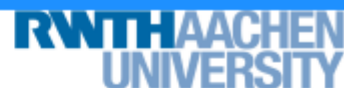

**Sample name:** Zou 373  
**Data file:** C:\SNOOPY\ZOU\373\IC.D  
**Description:** Laufmittel: n-Heptan/EtOH 9:1;  
 Probe ist in LM/DCM gelöst  
**Injection date:** 9/24/2014 3:13:14 PM  
**Acq. Analysis method:** CHIRALPAKIC1-6LNP.M  
**Column:** Chiralpak IC, (150 x 4,6) mm, 5µ, SN: IC00CD-QF015

**Pressure at start:** 24 bar      **Start flow:** 0.700 ml/min      **Column oven:** 30 °C

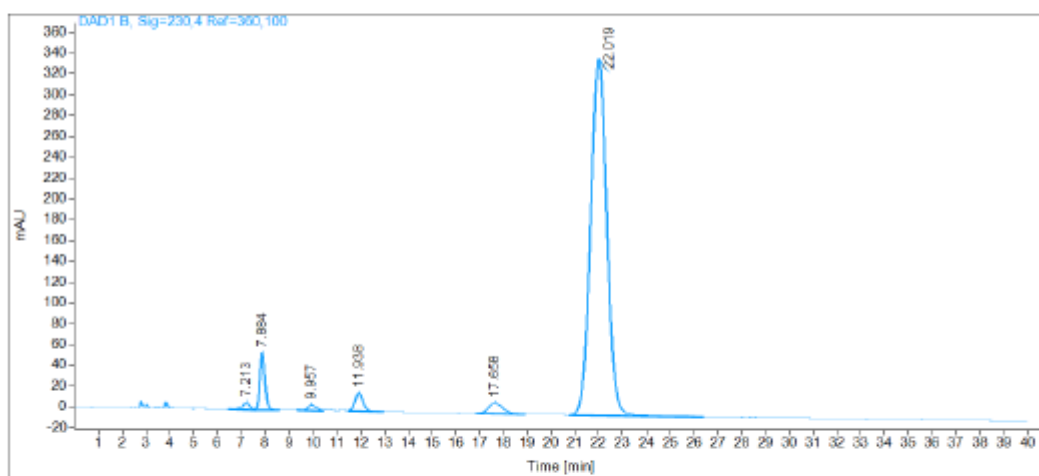

| Name     | Zou 373 |        |          |        |             |  |
|----------|---------|--------|----------|--------|-------------|--|
| RT [min] | Type    | Area%  | Area     | Height | Width [min] |  |
| 7.21     | BV      | 0.77   | 138.52   | 6.55   | 0.32        |  |
| 7.88     | VB      | 4.64   | 840.29   | 54.47  | 0.24        |  |
| 9.98     | BV      | 0.74   | 134.53   | 5.27   | 0.39        |  |
| 11.94    | VB      | 2.40   | 434.64   | 17.51  | 0.38        |  |
| 17.66    | BB      | 2.31   | 417.37   | 10.11  | 0.64        |  |
| 22.02    | BB      | 89.14  | 16127.83 | 342.30 | 0.74        |  |
|          | Sum     | 100.00 | 18093.17 |        |             |  |
